# Supplementary material for: Pro-cognitive restoration of experience-dependent parvalbumin inhibitory neuron plasticity in neurodevelopmental disorders
Source: Research Square preprint supplement (doi:10.21203/rs.3.rs-5624085/v1), 2025-01-16
Supplement: Supplementary file 1 [file 10317460352413f644717a17.xlsx]

## Sheet: Sheet 1 - Supp table 1. all Gen
Supp table 1. all Genes_cpm_shR_vs_NT
Row.names	shR_1	shR_2	shR_3	shR_4	NT_1	NT_2	NT_3	NT_4	NT_5	logFC	logCPM	PValue	FDR
Ylpm1	115.157	100.764	108.418	118.912	54.4771	57.6922	41.8439	34.3061	35.6384	1.23889	6.19064	2.78e-12	4.18e-08
Fbxo46	138.372	81.9257	125.542	34.0375	27.3088	9.30191	11.8848	9.04828	9.54601	2.79917	5.64986	4.13e-10	3.11e-06
Usp53	34.3957	18.5671	26.3027	32.6147	12.6527	11.3859	7.53914	7.59669	5.55404	1.57139	4.09169	6.7e-10	3.36e-06
Dock4	110.98	103.847	113.353	198.534	60.9089	55.5065	42.8974	24.3868	27.4231	1.54563	6.30481	9.7e-10	3.64e-06
Lima1	168.131	89.0069	144.492	41.6439	29.98	10.6235	10.2717	6.8225	5.06228	3.13408	5.82366	1.56e-09	4.68e-06
2310046A06Rik	32.3569	29.3753	33.9517	19.5907	12.1255	6.45542	4.77369	3.53222	3.21093	2.2303	4.01336	2.02e-09	5.06e-06
Arhgap21	146.1	142.337	162.06	189.231	87.9014	72.5346	63.5395	38.9996	37.5766	1.3411	6.67753	5.16e-09	9.43e-06
Dlg5	87.2388	49.7721	68.6436	48.4843	28.3984	27.7532	19.1277	14.3708	13.1908	1.58975	5.2995	5.56e-09	9.43e-06
St5	69.9752	79.0119	129.688	60.578	35.8494	13.6733	11.819	9.14506	8.82282	2.38862	5.53768	5.65e-09	9.43e-06
Gm7224	3.48561	1.49079	2.07263	0.656672	0.281172	0.0508301	0.098766	0.14516	0.0289273	3.91615	0.0187584	7.63e-09	1.15e-05
Nhsl1	30.4168	18.6349	24.4768	41.8081	13.3557	13.9274	9.81076	8.61281	7.08719	1.35228	4.18072	1.05e-08	1.44e-05
Epb4.1l4b	61.4256	42.352	61.8335	33.4355	21.6502	22.5177	16.4281	13.645	11.5709	1.50494	4.98355	1.48e-08	1.74e-05
Ift172	114.203	68.5425	108.024	65.0105	40.9808	29.5323	20.9713	13.1611	13.3066	1.88465	5.70835	1.5e-08	1.74e-05
St18	21.6042	18.7026	21.1211	33.4903	9.10294	13.0125	9.81076	5.46768	6.39293	1.34929	3.90727	1.88e-08	2.02e-05
Gsn	968.078	461.366	768.749	164.551	136.755	73.8053	54.6176	21.1933	22.1294	3.27207	8.22612	2.15e-08	2.15e-05
Myo6	342.116	170.153	235.145	190.763	94.5792	66.8924	30.5845	24.7255	18.9763	2.28767	7.00356	2.67e-08	2.51e-05
Crocc	56.8877	19.9224	31.1882	56.8021	15.8159	17.3331	10.8313	7.35476	8.64926	1.68864	4.59302	3.11e-08	2.75e-05
Ppp1r9b	2740.97	1112.91	1958.54	446.427	429.525	236.004	133.4	91.2086	158.927	2.89359	9.67761	3.49e-08	2.92e-05
Sorbs2	567.989	498.161	599.287	185.017	163.888	67.604	71.8358	38.6609	29.3033	2.6351	7.95839	4.05e-08	3.2e-05
Lrch3	44.9512	28.1217	32.2245	51.1109	21.2636	18.6038	17.3828	13.7418	11.137	1.1581	4.69631	4.96e-08	3.72e-05
Kcnq5	50.9688	40.5224	52.9015	41.3156	24.1105	19.4679	18.7655	9.48376	10.6742	1.44264	4.88581	5.63e-08	4.03e-05
Pcdh20	42.189	56.3112	67.1138	81.4273	28.3632	22.8735	32.8562	17.2256	15.7075	1.30754	5.30937	6.01e-08	4.11e-05
Nedd4l	76.5189	69.0846	89.6167	105.396	47.5181	44.0697	44.4447	26.8061	26.4974	1.08768	5.85331	6.33e-08	4.13e-05
Gdap10	16.9677	8.94474	7.30356	26.8141	2.24938	5.94712	1.87655	2.61287	1.07031	2.35684	2.95462	6.98e-08	4.37e-05
Mcf2l	163.297	169.747	230.013	249.864	119.99	84.6321	81.2515	59.2251	45.9655	1.30184	7.03442	7.57e-08	4.54e-05
Usp54	36.8948	35.6096	41.4033	49.5787	20.4904	19.5188	20.5763	10.2579	10.0088	1.26173	4.7361	7.85e-08	4.54e-05
Pde1a	65.1743	76.0303	80.3885	110.704	37.5365	42.3923	47.1772	23.0804	31.5018	1.0981	5.80676	8.56e-08	4.59e-05
Scin	11.7721	4.67566	9.47489	3.22864	1.86276	1.11826	0.757206	0.241933	0.376055	3.0509	1.92705	8.32e-08	4.59e-05
Grik4	29.3317	23.6832	30.2506	38.3058	16.1674	15.0457	15.0454	10.5967	8.41784	1.13412	4.34983	9.1e-08	4.72e-05
Trpm3	16.2771	11.8247	15.9889	25.2819	8.64604	5.08301	5.30044	2.90319	2.95058	1.69843	3.34745	9.56e-08	4.79e-05
Plekhg1	14.633	10.876	16.1369	34.1469	7.20503	7.21787	4.14817	4.49995	2.40097	1.78151	3.42352	1.18e-07	5.7e-05
Tes	16.3429	3.62533	6.2179	7.55172	2.10879	2.23652	0.592596	1.0645	0.896746	2.5642	2.16622	1.21e-07	5.7e-05
Phlpp1	49.6206	52.8892	60.0077	82.3576	38.5557	28.3632	25.9425	19.6449	18.2242	1.13625	5.35165	1.26e-07	5.75e-05
Grm7	33.2119	30.9	29.609	76.2834	17.2921	20.0271	18.1729	13.4515	11.1659	1.27774	4.73606	1.58e-07	6.77e-05
Syne2	71.5865	54.1767	71.6539	71.6867	41.6837	28.1599	22.8479	15.3869	15.6786	1.37908	5.42531	1.54e-07	6.77e-05
Plekhg3	12.7586	9.72402	17.0252	12.2031	4.5339	5.79463	2.83129	2.03224	1.33066	1.94382	2.90841	1.67e-07	6.96e-05
Dennd2a	20.7163	16.8053	18.3576	33.928	11.985	11.081	8.5268	6.96766	6.71113	1.20376	3.86787	1.77e-07	7.18e-05
Tjp1	167.309	121.262	183.675	109.883	69.5901	42.6973	26.0084	15.3869	14.6951	2.08992	6.36895	1.87e-07	7.38e-05
Sorcs3	12.7586	12.3329	12.5345	18.551	5.93976	7.06538	6.02473	2.99997	4.51266	1.31202	3.1752	1.97e-07	7.59e-05
Hectd2	24.3006	17.0424	15.3474	22.7646	9.20838	9.86104	8.39511	5.22575	4.07875	1.36474	3.66602	2.12e-07	7.95e-05
2900026A02Rik	127.258	111.267	191.472	56.5285	43.2302	23.7885	15.4404	5.66123	8.82282	2.65535	6.02754	2.3e-07	8.42e-05
Arhgef26	34.7903	33.6105	37.4554	78.4175	23.6887	22.8227	15.5721	12.0966	12.2941	1.29861	4.85415	2.54e-07	9.1e-05
Vps13b	48.2066	43.504	43.9201	90.7849	31.7724	28.8207	22.4528	21.0965	16.1414	1.12228	5.21965	2.67e-07	9.32e-05
Arhgap39	200.718	140.642	165.515	136.478	87.7959	69.7389	57.1526	35.6609	27.452	1.49334	6.66103	2.81e-07	9.43e-05
Myo9a	257.672	163.309	212.198	144.085	105.123	90.6809	52.6423	42.9189	44.4612	1.49963	6.93999	2.82e-07	9.43e-05
Actn1	439.614	354.842	581.472	118.748	116.089	28.8715	33.5475	13.1128	14.9554	3.18196	7.58111	3.08e-07	9.7e-05
Baiap3	3.91309	6.70855	11.4488	11.5465	1.15983	3.30396	2.37038	1.4516	1.73564	1.98626	2.25135	3.1e-07	9.7e-05
Mpdz	207.69	126.344	179.085	81.1537	71.1716	45.7979	50.1731	28.9352	32.0514	1.67194	6.51832	3.03e-07	9.7e-05
Gas2l3	19.7298	23.3783	30.4973	11.3276	9.45441	5.64214	6.68317	5.17736	3.99197	1.75067	3.70502	3.54e-07	0.000107
Iqgap1	95.0321	75.4204	119.028	83.2331	48.6779	23.026	12.7408	14.516	7.86822	2.08863	5.71689	3.57e-07	0.000107
Sv2b	95.3938	137.864	156.533	177.192	68.7114	56.0656	76.5107	32.6125	41.366	1.2797	6.52233	3.63e-07	0.000107
Kit	27.3258	34.0171	38.9852	50.509	18.8737	15.6557	19.9837	9.3386	10.5585	1.24819	4.61639	3.8e-07	0.00011
Myo10	118.215	64.375	105.902	155.358	48.0804	48.6952	18.0413	14.3708	12.3809	1.90629	5.96588	4.15e-07	0.000118
Mical1	30.088	13.6882	19.4926	20.1927	8.61089	4.77803	2.73253	2.03224	1.01246	2.40181	3.48617	4.4e-07	0.000119
Thsd4	22.3934	19.5836	23.8846	27.5802	12.3716	10.3693	10.7655	5.37091	5.0912	1.33608	3.90893	4.45e-07	0.000119
Zfp667	33.1461	21.0743	24.1314	22.1627	12.9339	12.555	11.5885	9.09667	7.955	1.15528	4.09688	4.41e-07	0.000119
BC018507	63.1355	51.7372	59.909	78.527	37.3959	42.6465	31.1771	24.6288	26.266	0.883759	5.50336	4.92e-07	0.00013
Fgd4	41.5313	37.4053	30.6947	54.066	24.0753	25.8725	16.1976	17.3224	15.6497	0.956376	4.83809	5.14e-07	0.000133
Azi1	150.933	66.1707	94.0087	47.2804	39.4695	27.2958	30.1236	21.9675	19.902	1.6527	5.79163	5.24e-07	0.000134
Nwd1	21.7686	15.8905	15.9889	67.9655	11.1063	9.75938	5.30044	5.32252	5.0912	1.89302	4.03352	5.71e-07	0.000143
Arhgef10	21.3411	18.0928	23.1937	43.2856	10.7197	13.8258	12.1811	8.22571	6.364	1.25773	4.07706	6.25e-07	0.000153
Pde4b	35.9083	41.5727	45.4499	84.5465	26.8871	23.331	25.9096	18.5804	17.2696	1.08984	5.10609	6.31e-07	0.000153
Gm14636	11.8379	6.09869	4.24396	9.85007	1.93306	3.40562	1.11935	0.532252	0.838891	2.30725	2.11708	6.44e-07	0.000154
Slit1	55.7697	37.7441	52.8521	103.699	26.3599	27.4483	24.2306	10.3063	9.97992	1.56515	5.21144	6.7e-07	0.000157
Slc24a4	9.43744	6.09869	7.8464	17.0187	3.44436	3.91392	4.1811	2.75803	2.34311	1.47382	2.61963	7.35e-07	0.00017
C77370	63.2013	55.9046	69.4825	65.7219	42.1055	34.717	25.6462	21.0481	19.0631	1.09671	5.44551	7.62e-07	0.000173
Met	1.05226	0.914803	1.5298	2.9003	0.246025	0.10166	0.427986	0.14516	0.3182	2.44148	-0.193385	7.72e-07	0.000173
Tnrc18	55.3422	36.9648	48.9043	57.021	29.9448	17.0789	18.568	9.7257	8.88068	1.48427	4.94346	8.95e-07	0.000198
Acvr1c	8.45095	5.92928	7.94509	11.3823	2.98745	4.26973	3.48973	1.88708	2.45882	1.38774	2.41738	9.61e-07	0.000209
Arrdc3	35.2835	30.1885	32.4712	54.5585	22.1774	19.7221	19.819	18.774	15.5918	0.87796	4.75905	1.06e-06	0.000221
Ddx26b	85.7919	55.6675	55.7637	114.589	42.7381	43.9172	37.992	33.677	27.5966	0.959366	5.74996	1.05e-06	0.000221
Mtmr10	17.2307	10.8082	10.3632	30.3711	7.5565	6.7604	5.43213	4.40318	3.06629	1.53431	3.35353	1.03e-06	0.000221
Cnr1	53.6323	62.5793	71.2591	100.361	41.2268	32.5313	36.8727	17.5159	22.679	1.15802	5.57331	1.29e-06	0.000255
Dock9	109.303	109.065	122.433	164.496	78.2712	71.8229	55.0456	33.4835	35.4359	1.12726	6.40179	1.32e-06	0.000255
Nin	53.5994	32.7635	44.0188	67.8561	27.9766	28.2107	15.9013	12.5321	12.0916	1.27656	4.99185	1.28e-06	0.000255
Odf2	99.5042	59.2928	67.5086	103.754	45.9365	52.9141	41.4488	34.7899	32.1961	0.904723	5.87111	1.32e-06	0.000255
Prpf8	72.3757	64.375	84.5832	74.587	47.026	41.1724	39.8686	29.7577	26.2949	0.941769	5.72546	1.25e-06	0.000255
Tspyl2	147.481	113.368	125.69	226.99	86.8118	84.7846	82.3709	75.1443	63.3508	0.853397	6.76952	1.32e-06	0.000255
Mink1	260.27	199.02	215.406	149.721	114.226	75.4319	98.6343	58.1122	45.0398	1.35165	7.0738	1.35e-06	0.000257
Il16	43.0768	43.0635	52.1613	25.2271	18.4871	14.3849	9.67907	3.72576	4.65729	1.99811	4.57457	1.4e-06	0.000261
Sorbs1	600.248	570.6	790.068	362.319	319.692	103.49	173.697	110.902	99.1338	1.80904	8.44678	1.41e-06	0.000261
Gm12264	3.78155	1.01645	1.82589	0.766117	0.456904	0.304981	0.131688	0.0967731	0.202491	2.89746	0.0571981	1.75e-06	0.000317
Plekhh1	13.3176	13.2477	17.5187	16.5262	5.30712	8.13282	7.44037	3.29029	3.03737	1.4221	3.26963	1.74e-06	0.000317
Prex1	33.6065	36.4905	43.8707	69.3336	27.8009	18.9088	19.3911	11.0805	11.5131	1.2662	4.87521	1.84e-06	0.000329
Nrp2	31.9624	32.6957	33.3595	61.5082	20.4201	19.4679	23.1442	13.3547	13.8851	1.02821	4.75671	1.91e-06	0.000337
Exph5	9.89781	11.5197	14.0643	6.51199	3.97155	2.33818	1.11935	0.677412	0.376055	2.63027	2.5004	1.97e-06	0.000344
Pkp2	48.8314	25.75	29.2636	33.4355	13.9883	22.2128	8.95479	7.2096	6.94255	1.49619	4.42187	2e-06	0.000346
Mast4	99.8659	78.8425	92.775	112.127	56.2344	64.91	39.0784	27.29	27.8281	1.09274	6.02629	2.05e-06	0.000349
Fbxo34	2317.11	1153.46	1741.01	428.697	500.697	124.432	128.956	58.451	58.2596	3.01698	9.51028	2.13e-06	0.00036
Myh14	212.26	138.881	214.221	69.6072	81.083	32.4296	42.7657	27.0965	30.3447	1.86626	6.57233	2.24e-06	0.000374
Rin1	33.7052	25.3773	34.3958	50.8373	20.9122	18.248	15.0454	9.09667	8.07071	1.25023	4.54283	2.3e-06	0.00038
Dcc	9.10861	7.1829	8.43858	26.5405	4.28787	4.16807	3.8848	2.61287	1.38851	1.82704	2.82776	2.33e-06	0.000381
Dock10	43.0111	35.7112	45.0057	56.0907	23.9348	28.2107	16.889	9.7257	10.0378	1.27816	4.8639	2.73e-06	0.000436
Prkcc	183.619	185.095	210.57	252.436	133.381	112.944	123.82	80.1765	79.0583	0.889772	7.2189	2.7e-06	0.000436
Myo18a	248.3	263.938	328.068	155.412	143.538	94.4932	90.1405	52.4994	55.9454	1.48574	7.31727	2.81e-06	0.000443
Zfp185	25.8461	25.1401	41.4033	17.4565	11.2469	2.79566	1.77779	0.967731	1.18602	2.91838	3.83174	2.83e-06	0.000443
Ahdc1	50.1796	30.5273	37.11	31.4655	21.0176	21.0945	11.9507	8.85474	11.6577	1.27824	4.62542	3.01e-06	0.000461
Cyfip1	64.1878	59.5977	75.1083	142.881	47.4478	39.5967	41.1196	24.532	22.6211	1.1681	5.79217	2.99e-06	0.000461
Myh9	367.14	186.518	306.404	115.027	101.398	44.1205	26.6668	12.9676	12.1784	2.62742	7.02563	3.04e-06	0.000461
Kalrn	589.594	228.26	361.033	265.186	133.908	162.301	65.1197	32.5158	36.4484	2.05974	7.67902	3.09e-06	0.000464
Plekha5	56.0328	30.0191	37.8996	39.5097	19.7875	25.9234	14.5186	8.9999	10.2981	1.31586	4.73206	3.23e-06	0.000481
Nkd2	12.66	9.11415	10.2645	21.6702	6.36151	6.04878	5.89304	4.25802	3.61591	1.23952	3.10898	3.31e-06	0.000488
Gprin3	5.68877	7.21678	8.19183	10.6709	2.70628	1.93154	4.24694	2.22578	1.82242	1.50434	2.30079	3.42e-06	0.000498
Svil	25.6159	22.7684	32.1752	20.0832	11.6335	8.28531	3.02882	1.98385	1.88027	2.21989	3.81237	3.45e-06	0.000498
Ccnt2	123.147	58.6152	55.7143	130.24	40.4888	57.438	28.7738	26.1287	21.2616	1.31493	5.85927	3.6e-06	0.000515
Syde2	2.66353	2.67665	2.22068	5.52699	1.08954	1.27075	0.82305	0.241933	0.520691	1.93684	0.905998	3.63e-06	0.000515
Akap11	208.544	202.307	251.381	313.615	164.204	144.612	96.264	78.7733	95.1419	0.992279	7.40332	3.68e-06	0.000516
Ssh2	212.063	104.118	167.933	48.3748	59.8193	21.3995	26.9302	12.145	13.0462	2.30687	6.22045	3.74e-06	0.000521
March1	15.5537	14.8063	14.5084	40.7684	8.15399	11.3859	7.73667	6.43541	6.364	1.28177	3.74	4.03e-06	0.000545
Pxdn	41.8602	22.6329	26.6975	82.3576	12.8285	25.3642	12.0165	8.37087	8.85175	1.56899	4.6609	4.01e-06	0.000545
Sall3	4.80093	3.96415	4.83614	10.3426	2.70628	2.13486	1.58026	1.54837	1.04138	1.60965	1.83371	4.06e-06	0.000545
Zfp619	4.04462	1.76184	3.65178	4.76087	1.30042	1.16909	1.18519	0.870958	0.781037	1.63581	1.12306	3.97e-06	0.000545
Spna2	8539.83	4673.08	7963.01	1928.48	1987.89	970.753	434.373	172.74	272.148	2.93026	11.5572	4.11e-06	0.000547
Cecr2	10.1609	4.6079	5.62572	15.596	2.60084	4.62554	1.74487	1.83869	1.50422	1.76822	2.36461	4.3e-06	0.000561
Pogz	35.7439	38.049	39.232	36.1717	22.3883	22.6702	18.8972	11.0805	14.7529	0.995386	4.72155	4.29e-06	0.000561
Rasal1	27.1614	25.0385	30.9908	48.1559	18.2762	19.7729	16.6256	10.7902	11.8313	0.986843	4.49966	4.44e-06	0.000575
Kdm5b	66.1936	58.0392	63.7581	103.371	44.8118	42.8498	40.2965	29.7093	36.2459	0.800904	5.7241	4.52e-06	0.000581
Gm16185	3.6829	1.52467	1.18436	4.92504	0.70293	0.864112	0.197532	0.14516	0.433909	2.46866	0.591895	4.61e-06	0.000587
Bms1	48.5025	27.5796	39.3307	38.6889	20.0335	24.1443	20.4775	16.645	14.4058	0.942252	4.78168	4.7e-06	0.000594
Mast3	122.884	129.224	163.343	217.96	93.5951	75.6352	78.3873	37.1125	37.4608	1.21227	6.69246	4.8e-06	0.000601
Raver2	32.7844	22.023	25.7599	35.1867	15.2184	19.1121	11.6215	7.16121	7.955	1.17786	4.265	4.95e-06	0.000615
Lgi1	71.9482	63.0198	61.2907	94.7249	44.9524	46.3062	42.5682	28.0642	25.2246	0.872478	5.70188	5.08e-06	0.000625
Amot	144.159	70.6092	149.476	29.4955	39.118	13.7241	10.1071	4.16124	7.2029	2.73251	5.71761	5.4e-06	0.000627
Dock7	23.347	25.4112	25.2664	41.7534	17.5381	15.9607	15.0454	11.2257	9.57493	0.961183	4.33046	5.45e-06	0.000627
Gm17195	5.39282	1.49079	1.08566	5.47226	0.738076	0.813282	0.32922	0.0483866	0.289273	2.80637	0.783528	5.22e-06	0.000627
Guf1	76.782	37.9474	35.2348	90.4018	29.4176	34.6661	20.247	20.9514	18.4267	1.17431	5.28861	5.37e-06	0.000627
Lcp1	59.7814	31.8148	41.354	13.0787	15.0427	7.4212	4.9383	2.12901	2.31418	2.52297	4.31638	5.47e-06	0.000627
Pclo	233.075	200.342	265.248	319.635	176.576	143.951	93.301	105.725	112.209	0.922644	7.49377	5.43e-06	0.000627
Peg3	1916.1	766.097	1250.93	392.197	381.48	409.691	191.178	111.047	126.441	2.15821	9.26922	5.17e-06	0.000627
Scn2a1	101.181	93.9198	115.031	126.683	64.6344	71.3146	54.4859	29.8545	34.221	1.03704	6.23719	5.26e-06	0.000627
Zmym6	48.8971	27.1392	27.0923	73.1642	20.1741	22.4669	19.0948	13.2095	9.37244	1.27166	4.79727	5.4e-06	0.000627
Actn4	2053.55	2071.55	3188.35	699.082	703.808	95.2048	180.149	64.0154	58.491	3.18618	10.0024	5.53e-06	0.00063
Syne1	310.35	257.602	384.523	572.125	232.494	181.667	105.252	73.5959	81.0253	1.41212	7.88066	5.62e-06	0.000635
Tanc1	83.1284	73.6925	84.9286	137.19	59.4679	51.745	41.6793	23.2255	25.4271	1.14209	5.96828	5.86e-06	0.000657
Dbn1	9501.57	4163.4	6911.54	1986.92	2219.15	584.394	513.485	206.369	295.29	2.88111	11.5246	6.05e-06	0.000674
Gabrb1	53.6652	52.7536	59.5142	112.783	39.9616	42.1382	33.2183	28.161	28.6669	0.900364	5.60401	6.18e-06	0.000683
Cadps2	25.7146	22.7684	25.8586	37.2661	15.8159	14.3849	12.2141	5.22575	6.82684	1.27582	4.17105	6.33e-06	0.000689
Dmxl2	117.031	109.099	129.392	156.014	81.1532	87.6819	72.4943	54.7736	61.4126	0.755262	6.57268	6.31e-06	0.000689
Agxt2l1	6.44508	6.91184	8.09314	13.7901	3.93641	4.42222	1.84363	1.83869	2.80595	1.46391	2.44125	6.4e-06	0.000692
Map4k5	42.3534	26.3599	25.2664	73.1642	18.3816	24.9068	15.1112	11.6128	11.0502	1.24897	4.72161	6.72e-06	0.000721
Fa2h	16.5402	14.7724	16.5811	34.2564	8.75148	11.9451	9.97537	6.62896	6.47971	1.11372	3.75979	6.83e-06	0.000728
Mcm3ap	41.0381	56.2434	61.6362	66.9258	34.6193	23.2294	31.0455	15.9676	14.3769	1.16656	5.23994	7.04e-06	0.000745
D630045J12Rik	41.8273	28.3589	34.9387	54.066	24.0402	24.6526	20.5433	15.0966	13.1041	0.939079	4.80112	7.55e-06	0.000793
Hhip	2.30182	2.33783	3.30634	3.99475	1.01925	0.965772	1.3498	0.725798	0.578546	1.57726	0.898745	7.67e-06	0.000797
Ppp2r3a	30.2853	27.3763	29.461	45.8028	21.7205	19.5188	16.8561	12.9192	11.4552	0.916526	4.55086	7.72e-06	0.000797
Tro	146.297	147.249	176.124	171.008	98.9374	112.436	75.0622	51.5801	52.6477	0.980934	6.81927	7.76e-06	0.000797
Zcchc24	29.3646	30.9339	38.1957	92.9738	26.149	17.3839	15.6709	14.3224	9.83528	1.38141	4.86247	7.79e-06	0.000797
Pdgfra	9.47033	12.2313	15.9395	18.934	7.27532	7.37037	6.38687	4.54834	3.87626	1.1784	3.23329	7.91e-06	0.000803
Ptprz1	66.1279	58.5474	83.3988	221.791	45.6553	55.2015	26.4693	27.4836	22.3319	1.46632	5.98946	8.12e-06	0.000813
Rev3l	79.1167	49.7721	60.4518	80.1687	40.4888	43.3072	19.6215	16.2579	19.2656	1.21381	5.47006	8.08e-06	0.000813
Clk1	234.193	97.1385	102.201	278.155	56.7264	113.097	45.169	59.08	39.1676	1.409	6.76732	8.37e-06	0.000833
Sipa1l1	364.64	401.666	575.797	214.567	224.586	109.844	121.318	64.0638	70.1776	1.70257	7.90611	8.46e-06	0.000837
Clk4	129.263	66.95	67.6567	160.83	45.339	69.9422	36.6422	45.1447	33.3242	1.10088	6.13537	8.67e-06	0.000846
Nfrkb	20.0587	19.7868	20.3809	29.6597	14.0937	11.6401	11.6544	8.03217	6.33508	1.02967	3.95014	8.62e-06	0.000846
Kcnf1	10.9172	18.2961	15.15	25.5007	7.76737	7.47203	8.79018	3.38706	5.81439	1.28666	3.48779	9.54e-06	0.000925
Kcna4	19.7627	15.2806	16.3343	42.5195	10.2628	12.4534	8.03297	3.87092	5.4094	1.43497	3.82888	9.84e-06	0.000948
Ptk2b	277.994	254.654	328.414	337.639	175.416	166.214	167.145	74.0798	91.4681	1.08517	7.67785	9.98e-06	0.000956
Rgnef	54.9147	45.2658	50.5821	94.2324	34.4436	40.2066	20.7738	15.2901	15.7364	1.18746	5.31518	1.03e-05	0.000981
Dlg1	42.4192	32.9668	34.8893	64.901	29.3122	24.1443	20.5104	16.8869	15.0133	0.942903	4.92726	1.04e-05	0.000984
Morc3	39.7885	41.7421	40.7124	42.3553	29.8394	24.6018	18.8972	17.9514	15.4761	0.881373	4.90257	1.06e-05	0.000991
Atr	9.37168	5.96316	5.62572	16.3621	4.18243	4.06641	2.60084	2.99997	2.11169	1.42193	2.51643	1.08e-05	0.00101
Erc2	337.249	133.765	172.571	143.756	93.9817	108.929	71.2432	49.1123	48.7136	1.36622	6.99484	1.13e-05	0.00102
Myh10	1412.53	771.043	1081.12	235.198	395.925	183.7	148.742	85.0636	95.6625	2.26791	8.95095	1.12e-05	0.00102
Myo7a	20.3217	20.1934	27.7338	22.8741	14.1992	6.70957	8.19758	4.20963	3.09522	1.58902	3.81126	1.12e-05	0.00102
Per2	17.2636	18.4655	20.7757	28.6747	13.3908	8.64112	10.963	6.24187	5.61189	1.15191	3.82669	1.11e-05	0.00102
Tpm2	36.5989	30.8661	27.9805	34.53	50.7515	64.0968	41.4159	73.3056	79.174	-1.02296	5.6318	1.13e-05	0.00102
Acsbg1	46.694	49.2977	60.0077	201.325	37.2904	27.0924	29.0043	27.919	21.7533	1.46375	5.70735	1.16e-05	0.00103
Dgkh	45.1813	35.9145	39.5774	95.0532	29.5231	25.2626	21.2347	11.2741	10.5295	1.34688	5.05799	1.16e-05	0.00103
Mmp16	37.3552	26.8003	23.8353	50.1259	21.7908	16.2148	15.8026	14.7579	9.57493	1.03712	4.54977	1.15e-05	0.00103
Nek1	266.189	90.6333	153.77	76.7759	58.5541	73.297	27.7862	22.6933	23.0551	1.83427	6.45272	1.16e-05	0.00103
Aloxe3	4.93246	3.65921	3.40504	7.82534	2.21423	1.47407	1.67902	0.967731	1.73564	1.47328	1.61894	1.21e-05	0.00106
Kcng1	11.805	16.0599	15.0019	18.1132	8.29457	7.16704	8.5268	4.74188	5.95902	1.04666	3.40002	1.22e-05	0.00106
Magel2	2.30182	2.64276	3.70113	4.76087	0.386611	1.47407	1.28396	0.774185	0.491764	1.84445	0.982793	1.24e-05	0.00106
Mical3	84.3122	35.474	55.8624	38.6889	24.462	29.5831	10.3046	7.93539	12.4098	1.63896	5.04049	1.23e-05	0.00106
Phrf1	125.646	82.1629	96.5255	55.051	50.2595	31.413	44.4447	26.9029	20.7119	1.33022	5.89189	1.23e-05	0.00106
Psd3	110.882	118.721	145.43	272.136	94.052	85.6996	49.5805	33.4351	53.2262	1.24542	6.68564	1.24e-05	0.00106
Tspan18	13.2519	10.3	15.298	19.0982	7.09959	6.7604	8.32927	4.49995	4.33909	1.127	3.28409	1.22e-05	0.00106
Neo1	28.97	26.9697	26.6481	58.0607	21.1582	12.5042	17.1853	8.85474	9.28566	1.22443	4.49399	1.28e-05	0.00108
Spnb4	386.047	303.918	436.832	336.216	265.778	153.202	139.556	99.144	120.771	1.17343	7.94958	1.3e-05	0.00109
Il1rap	70.3698	26.7326	25.1183	62.0007	16.4486	28.1599	12.6091	8.46765	8.30213	1.5669	4.78806	1.32e-05	0.0011
Scn3a	27.852	15.2806	18.8511	32.0675	9.03265	16.0623	7.53914	4.16124	4.74408	1.43583	3.86657	1.32e-05	0.0011
Gm15787	1.44686	0.474342	0.740226	1.80585	0.316318	0.304981	0.197532	0.0967731	0.173564	2.20656	-0.589865	1.33e-05	0.0011
Gas2l1	147.086	117.061	146.071	133.961	95.8796	75.0252	70.4202	67.4509	47.0936	0.869498	6.63265	1.35e-05	0.00111
Mtmr12	36.27	36.7615	39.0839	57.2399	29.8394	22.3144	22.5845	19.3546	18.5424	0.808235	4.94652	1.37e-05	0.00112
Trpc5	9.99646	5.86152	9.08011	11.9843	4.07699	4.52388	4.57616	2.46771	2.37204	1.26733	2.59038	1.38e-05	0.00112
Adamts2	2.56488	2.60888	2.9609	4.81559	1.15983	1.5249	1.28396	0.919344	0.75211	1.41833	1.0486	1.41e-05	0.00114
Med23	19.7956	20.5661	20.0848	35.0225	13.9883	12.3517	13.07	8.61281	6.71113	1.02293	4.02694	1.47e-05	0.00118
Gpr37	18.4803	21.1421	25.7599	41.5892	12.5824	15.249	14.8478	10.5483	8.50462	1.00767	4.19083	1.48e-05	0.00118
Kcnv1	18.4803	18.1605	20.2822	23.8591	12.1255	9.65772	12.247	7.01605	8.21535	0.94468	3.84108	1.51e-05	0.0012
Exd2	69.1202	49.0267	46.7823	89.2526	41.1917	33.5479	33.5475	30.7738	29.5348	0.801528	5.52533	1.54e-05	0.00121
Ccdc39	18.9407	10.8082	11.893	35.4603	7.80252	10.2169	6.45271	5.70961	6.39293	1.26135	3.59831	1.54e-05	0.00122
Ak4	25.6817	27.3424	29.7571	42.6837	18.1004	16.8248	17.712	10.4515	15.7075	0.886972	4.48223	1.56e-05	0.00122
Ptpn13	6.74103	5.62434	7.89574	19.3171	4.28787	2.94815	1.54733	2.56449	0.809964	1.89699	2.45176	1.58e-05	0.00123
2700049A03Rik	35.7768	14.5352	21.6639	20.904	10.6845	14.7916	7.04531	6.53218	6.30615	1.31151	3.92477	1.61e-05	0.00124
Senp7	374.505	213.623	369.669	107.311	134.892	74.3136	39.3089	27.1932	25.1667	2.15167	7.25264	1.61e-05	0.00124
Flnb	57.4139	52.5842	82.9053	62.0007	36.1306	24.0426	8.59264	7.11282	5.98795	1.93515	5.2009	1.67e-05	0.00128
C230081A13Rik	39.5912	31.1372	42.7357	49.6334	27.8009	23.2294	14.7161	9.7257	11.8891	1.15239	4.76991	1.68e-05	0.00129
Scn3b	77.3739	53.7701	54.8261	89.4168	39.7155	38.9359	36.6093	16.1127	18.0217	1.12255	5.52439	1.73e-05	0.00131
Mycl1	23.5114	26.9359	26.9936	31.4108	17.8896	14.2324	13.926	7.16121	9.48815	1.04192	4.23553	1.74e-05	0.00132
Plce1	7.9577	8.60592	8.19183	27.1424	6.36151	4.11724	2.33746	2.61287	2.97951	1.65904	2.88988	1.76e-05	0.00132
Hgf	1.5455	0.779277	1.4311	2.4078	0.246025	0.559131	0.49383	0.193546	0.404982	1.87544	-0.10148	1.78e-05	0.00133
Ano3	47.8449	37.5408	42.6864	61.8913	23.513	35.6827	24.6586	13.645	15.6207	0.994886	5.03936	1.79e-05	0.00133
1700071M16Rik	2.36758	1.32138	0.986968	7.93478	0.456904	1.06743	0.32922	0.290319	0.347127	2.49403	0.665425	1.81e-05	0.00134
Kank1	12.0681	9.04638	13.0773	37.3756	7.41591	7.57369	4.74077	5.41929	3.21093	1.51133	3.39282	1.82e-05	0.00134
Ntng1	5.06399	4.57401	6.71138	9.74063	2.77657	2.94815	2.79837	2.41933	2.11169	1.20671	2.1029	1.84e-05	0.00134
Zdhhc23	4.37345	3.79474	3.70113	4.92504	1.9682	0.762452	1.87655	0.580639	0.75211	1.71225	1.35344	1.84e-05	0.00134
Adarb2	14.0082	7.79277	8.29053	25.5555	5.69373	6.65874	4.34571	2.46771	2.16955	1.58753	3.02818	1.88e-05	0.00134
Cpeb1	81.6487	57.4632	59.2181	88.0487	45.4796	46.0012	43.6875	36.3383	33.0639	0.715491	5.74867	1.87e-05	0.00134
Reln	12.0023	12.9089	14.9526	23.2024	9.13809	8.08199	7.40745	4.3064	4.773	1.12487	3.39468	1.87e-05	0.00134
Setdb1	35.3164	27.9862	28.2273	38.9078	22.9858	17.8922	17.745	14.8063	12.5544	0.836371	4.56982	1.88e-05	0.00134
Ak5	128.803	154.941	161.123	206.085	104.701	102.626	99.3257	61.838	64.4789	0.827146	6.88778	1.94e-05	0.00137
Kcnn2	49.5219	33.5767	33.6556	64.518	28.8904	25.8217	23.5392	16.645	14.6661	0.948029	4.97759	1.92e-05	0.00137
Med12l	14.9618	12.7056	12.5345	22.6004	9.20838	6.35376	8.42803	4.54834	5.20691	1.10453	3.39595	1.93e-05	0.00137
Slit2	31.9952	35.4401	37.3567	49.0315	22.4938	21.0437	25.1195	16.7417	11.9759	0.894583	4.78029	1.98e-05	0.00139
Skil	33.9025	29.9174	30.0038	60.1402	25.1649	20.4337	18.2717	11.9515	12.4098	1.01512	4.70756	2e-05	0.00139
Adnp2	83.5888	49.8398	66.3243	27.7991	30.6829	23.3818	22.0907	15.145	12.728	1.42887	5.21156	2.05e-05	0.00142
Kif1b	500.711	508.258	690.631	689.232	404.817	364.909	288.792	220.933	258.523	0.882891	8.75014	2.06e-05	0.00142
Lca5	18.9078	10.5711	11.1527	20.904	7.34562	9.55606	5.39921	3.2419	4.54158	1.27058	3.31211	2.12e-05	0.00146
C330019G07Rik	73.2306	70.5415	77.8718	87.6657	60.1708	41.0707	40.1319	34.3545	29.1009	0.838356	5.81983	2.15e-05	0.00146
Gldc	21.8344	21.3454	26.1547	128.16	18.1356	9.04776	9.94245	12.145	6.21937	1.94604	4.68823	2.15e-05	0.00146
Nckap5	5.75454	3.76086	4.93484	27.0877	2.28452	3.55811	1.90948	1.69353	1.35958	2.0783	2.41742	2.13e-05	0.00146
Actn2	612.48	677.564	1106.74	150.487	217.943	32.5313	46.0579	9.96763	19.7863	3.30289	8.34667	2.26e-05	0.00153
D630003M21Rik	1.80857	1.72796	2.22068	4.37781	0.948955	0.813282	0.724284	0.677412	0.781037	1.52946	0.652589	2.27e-05	0.00153
D7Ertd443e	13.6794	8.06382	12.6825	3.3928	4.21758	2.74483	2.07409	2.22578	1.21495	1.91365	2.5137	2.3e-05	0.00155
Ncor1	1024.34	414.677	552.949	475.047	309.113	372.076	159.54	158.321	157.596	1.38	8.63489	2.32e-05	0.00155
Mtap2	569.37	731.232	849.434	956.388	546.387	336.648	399.212	264.868	271.193	1.0095	9.07376	2.36e-05	0.00157
Pvrl3	36.3358	33.1701	33.5569	71.3583	20.877	31.1589	20.8726	14.9514	14.9843	0.977486	4.89583	2.39e-05	0.00158
C77080	17.3294	16.8053	29.5103	10.7256	10.1573	7.47203	4.9383	2.90319	3.67377	1.66088	3.53583	2.4e-05	0.00158
Wasf1	269.51	219.79	242.399	298.676	168.457	144.815	165.466	117.095	132.4	0.732282	7.59515	2.49e-05	0.00163
Ash1l	457.305	201.426	275.808	195.907	151.868	158.031	74.9634	58.9348	61.8465	1.45795	7.49217	2.54e-05	0.00165
Palm2	23.3141	13.8576	20.3315	18.8793	10.8954	8.9461	10.8313	7.35476	7.66573	0.984992	3.75802	2.54e-05	0.00165
Lad1	0.526129	0.542105	1.03632	0.601949	0.105439	0.15249	0.16461	0	0.202491	2.23612	-1.18507	2.73e-05	0.00177
Iqgap2	51.4949	34.627	33.2115	59.9213	24.462	31.2605	18.9302	11.1773	17.1539	1.03624	4.9343	2.8e-05	0.0018
Nrp1	88.6199	68.7796	69.4332	106.819	52.5089	60.5895	50.1731	37.9834	37.4319	0.716581	5.96504	2.88e-05	0.00185
Neu4	5.91895	3.38816	6.95812	8.31784	2.14394	3.60894	2.17285	1.35482	1.30173	1.46433	1.94462	2.91e-05	0.00186
Gria2	850.06	513.001	526.547	972.312	369.671	514.147	351.047	268.4	279.119	0.913469	8.97293	3e-05	0.00191
Wnt7b	15.2577	17.6523	21.96	53.5187	13.7423	9.70855	10.963	8.61281	7.92608	1.25691	4.08306	3.01e-05	0.00191
2610008E11Rik	29.6277	18.7026	21.9107	31.5202	16.1674	11.5893	14.4198	11.6612	9.80635	0.899707	4.18204	3.02e-05	0.00191
Gabra2	42.3534	36.5582	40.2683	60.3043	26.149	32.5821	26.8644	22.9352	20.0755	0.709431	5.07169	3.07e-05	0.00193
Ralgds	70.0081	66.9161	86.6558	120.609	59.6436	38.9867	43.3912	24.7255	20.7409	1.10678	5.84816	3.09e-05	0.00193
Kdm4c	22.788	21.6165	20.4796	36.3906	15.0427	12.1992	15.1112	12.7257	10.0956	0.844249	4.18377	3.11e-05	0.00194
Arhgap23	128.639	119.466	158.112	78.527	78.0955	52.965	56.5271	32.2738	33.6424	1.22515	6.36191	3.17e-05	0.00197
3110047P20Rik	19.1708	18.2961	20.5783	21.5607	10.2979	15.4524	9.94245	7.64507	7.69466	0.903711	3.84505	3.24e-05	0.002
Arhgef17	569.403	615.798	967.179	269.345	353.152	160.166	178.997	109.063	94.4476	1.74782	8.54058	3.29e-05	0.00203
Brd8	101.346	72.3033	77.9211	136.15	58.5541	68.9256	53.3337	48.6285	43.9695	0.725004	6.16714	3.34e-05	0.00203
Gpr21	1.70992	1.18586	1.03632	2.73613	0.456904	0.660791	0.625518	0.241933	0.404982	1.6629	0.0587363	3.34e-05	0.00203
Notch2	5.39282	3.18487	5.97116	23.1477	2.88201	3.2023	1.38272	1.54837	1.64886	1.96437	2.31967	3.31e-05	0.00203
Rassf2	14.896	13.8576	16.0876	28.1822	10.3682	10.8776	7.63791	4.40318	5.58297	1.13195	3.59522	3.32e-05	0.00203
Cpne4	35.7439	36.9648	46.5849	46.6784	22.7749	28.3124	24.066	12.1934	17.6167	0.913669	4.89514	3.37e-05	0.00203
Sema5a	16.7046	15.8566	20.1341	30.8636	13.2502	9.70855	8.55972	4.01608	5.52511	1.24945	3.75355	3.37e-05	0.00203
Prex2	46.0692	32.5941	40.7124	131.827	33.108	27.1433	12.5433	12.5321	12.5544	1.53889	5.18749	3.44e-05	0.00205
Stxbp5l	57.5454	58.5135	56.5533	64.0255	40.1724	23.1277	34.5681	19.9353	13.5669	1.09812	5.33674	3.43e-05	0.00205
Zfp445	49.2588	44.6221	49.1017	53.3546	35.1113	18.248	27.9837	16.7901	13.7405	1.05491	5.08325	3.48e-05	0.00206
Gm13110	1.61127	0.84704	0.838923	5.58171	0.316318	0.660791	0.32922	0.387092	0.144636	2.42595	0.196628	3.51e-05	0.00208
Ptgs2	9.37168	7.14902	9.2775	8.2084	3.90126	4.16807	4.54324	2.32255	1.70671	1.29728	2.49251	3.52e-05	0.00208
Mprip	8356.21	4077.38	6453.19	747.128	1657.4	411.876	393.813	95.9989	145.88	3.19982	11.2986	3.66e-05	0.00215
Kdm6a	17.9213	14.6368	14.311	20.7399	9.10294	11.2843	9.02063	4.93543	6.01688	0.988307	3.56303	3.68e-05	0.00215
Myo5a	2067.79	1199.68	1731.24	449.984	712.208	412.181	383.772	260.223	243.683	1.75014	9.70894	3.71e-05	0.00216
Slc12a2	31.5678	30.7984	35.4322	56.7474	24.0753	24.6526	21.959	17.8063	14.8976	0.799301	4.80897	3.78e-05	0.00219
Rreb1	41.2025	12.1296	15.8902	64.901	10.2979	17.5364	5.66259	4.79027	5.52511	1.81883	4.2129	3.83e-05	0.00221
Cbx2	2.23605	1.79572	2.02328	3.33808	0.70293	0.355811	0.855972	0.14516	0.867819	1.82225	0.497188	3.9e-05	0.00225
Dock11	11.7393	11.0454	12.5838	18.0037	6.88871	7.4212	6.97947	3.09674	3.21093	1.19036	3.14172	4.02e-05	0.0023
Klhl34	23.8073	16.8392	23.2924	29.6049	16.9055	10.8268	7.11115	5.66123	5.23584	1.27771	3.92184	4.03e-05	0.0023
Gpr17	7.85906	10.1645	11.5969	10.6162	4.04185	4.98135	5.8272	2.95158	1.96706	1.28803	2.73176	4.12e-05	0.00235
Ascc3	25.9119	17.1441	18.6537	28.6747	15.9917	12.1992	9.67907	9.14506	8.64926	0.928528	3.99792	4.22e-05	0.00239
Grhl1	12.1339	8.87698	9.12945	26.6499	6.5021	6.96372	5.89304	4.06447	4.07875	1.229	3.16969	4.27e-05	0.00241
Cttnbp2	198.153	86.5675	84.5338	235.143	62.3499	99.8812	51.095	34.1609	32.0225	1.343	6.5538	4.29e-05	0.00241
Cobl	4.53786	3.72697	4.39201	7.88006	2.24938	1.47407	2.13993	1.7903	2.05384	1.25858	1.74172	4.31e-05	0.00242
Gli3	3.6829	4.47237	6.0205	29.5502	2.84687	2.89732	1.9424	1.74192	2.05384	2.03744	2.49373	4.36e-05	0.00244
Dopey1	19.96	20.329	22.4535	28.8936	14.2343	11.7418	13.9589	9.82247	6.65328	0.935159	4.02001	4.45e-05	0.00247
Dapk1	53.994	43.8089	51.9639	79.2384	36.3063	34.2595	26.3705	12.4353	14.9265	1.12193	5.25476	4.56e-05	0.00253
Mtap7	245.308	75.3188	105.556	82.5217	58.6595	67.8074	33.6134	22.7417	23.8072	1.5987	6.29691	4.62e-05	0.00255
6820431F20Rik	14.633	8.57204	6.3166	21.9985	5.76402	6.65874	3.02882	3.2419	1.82242	1.54792	2.93993	4.88e-05	0.00267
Incenp	89.2118	45.0286	71.7526	28.5105	34.6896	22.9752	15.2429	9.62892	10.8477	1.63747	5.19178	4.88e-05	0.00267
Neurod1	16.0141	10.1984	12.2878	20.904	6.32637	8.28531	6.84778	2.66126	6.0458	1.19561	3.28498	4.9e-05	0.00267
Thsd7b	7.92482	6.84408	6.56334	20.521	3.76067	5.64214	3.39097	1.59676	2.2274	1.52797	2.63095	4.86e-05	0.00267
Limch1	2101.69	1079.6	1555.17	290.358	569.408	155.947	135.803	54.822	74.4588	2.6727	9.40087	4.93e-05	0.00267
Prox1	40.3475	30.0869	39.4787	56.1454	29.4176	22.9244	21.9919	14.0321	13.8562	0.929257	4.86762	5.01e-05	0.0027
Zkscan2	13.7451	7.65724	7.89574	12.2579	5.69373	5.2355	4.01649	4.79027	3.09522	1.10281	2.8255	5.01e-05	0.0027
Wsb1	188.157	59.6655	65.3373	282.588	59.2921	74.5169	34.8973	35.1286	32.63	1.5222	6.44573	5.09e-05	0.00273
Olfml2b	22.5249	14.9418	17.7654	17.1282	9.17323	11.5893	10.568	6.14509	6.56649	0.978546	3.68638	5.14e-05	0.00275
Zbtb16	23.5772	19.4819	22.0094	49.0315	18.0301	15.5032	10.996	8.9999	8.96746	1.06982	4.24288	5.27e-05	0.00281
Xpo4	13.3834	9.48685	9.42554	15.4865	7.41591	5.79463	5.5309	4.74188	3.12415	1.07614	3.02644	5.32e-05	0.00282
Atad2	59.4197	34.627	48.9043	26.3763	25.8327	18.7563	8.06589	8.2741	5.32262	1.66514	4.70519	5.34e-05	0.00282
Tnks1bp1	45.7404	39.7092	52.6054	74.4228	39.7507	24.0935	20.4775	12.1934	13.8272	1.17711	5.12714	5.39e-05	0.00284
Xylt1	11.1802	7.21678	6.41529	24.1327	3.51465	7.2687	2.96298	1.69353	1.82242	1.71587	2.79749	5.41e-05	0.00284
Esyt3	1.08514	0.982566	1.38176	4.1042	0.210879	0.711621	0.460908	0.387092	0.347127	1.99589	0.091637	5.52e-05	0.00289
Sbf2	48.5354	29.1043	29.9051	79.1837	25.7272	27.9057	16.9219	10.9354	10.761	1.2318	4.89158	5.58e-05	0.00291
Alpk1	3.15678	2.0329	1.67785	8.7009	0.773223	1.62656	0.625518	1.0645	0.6364	1.89066	1.10928	5.62e-05	0.00292
Cdc7	29.0358	13.3155	11.3008	39.6192	7.66193	14.3341	6.84778	7.69346	7.05826	1.30088	3.86678	5.63e-05	0.00292
Sbf1	121.667	116.654	138.373	170.352	101.257	71.3655	80.6918	48.3382	46.5729	0.889467	6.61209	5.78e-05	0.00298
Spnb1	795.935	468.447	750.688	556.693	398.807	167.689	77.9593	43.2576	70.4669	2.05135	8.50902	5.82e-05	0.003
Ints2	15.8168	14.2641	15.298	31.7939	9.45441	11.7418	10.3704	7.64507	7.08719	0.939953	3.73743	6.03e-05	0.00309
Ap4e1	12.4298	9.55461	7.79705	17.0187	7.4862	5.94712	3.91772	3.43545	3.47127	1.16906	2.9497	6.07e-05	0.00309
Epn2	69.1202	52.1099	63.3633	87.994	45.3038	49.1527	40.6258	32.3222	29.4769	0.703403	5.67974	6.06e-05	0.00309
2610005L07Rik	31.8308	16.297	11.9917	46.2954	11.7389	14.8932	6.15642	6.38702	4.02089	1.51864	3.98334	6.24e-05	0.00315
Acot11	12.6929	11.9941	15.5447	45.584	10.79	5.08301	7.20992	6.91928	5.4094	1.42282	3.67858	6.21e-05	0.00315
Herc1	99.833	96.3931	112.514	155.193	80.1691	85.2929	61.7617	50.8059	52.0113	0.725269	6.43507	6.26e-05	0.00315
Slc9a2	13.1532	6.70855	7.40226	23.3118	4.9908	6.86206	4.08233	4.11286	3.03737	1.32567	2.97203	6.27e-05	0.00315
Tprn	89.3104	56.3451	107.629	32.8883	38.9775	24.7543	24.8561	28.4029	20.683	1.34836	5.57483	6.44e-05	0.00322
Dio2	8.25365	8.19934	10.0177	28.5105	6.15064	5.2355	4.74077	2.95158	4.51266	1.37788	3.05896	6.49e-05	0.00323
Unc13c	2.56488	3.99803	5.28028	4.5967	2.35481	1.32158	0.625518	0.580639	0.462837	1.88695	1.28423	6.49e-05	0.00323
Egf	1.31532	0.84704	0.986968	1.86057	0.421758	0.660791	0.230454	0.193546	0.3182	1.68154	-0.313581	6.54e-05	0.00324
Dusp28	40.3475	30.7306	28.7701	29.003	46.6394	72.1279	42.206	56.4671	62.6565	-0.867739	5.5222	6.58e-05	0.00325
Tbr1	8.84555	9.72402	11.5969	17.1282	6.25608	5.79463	5.62966	2.17739	3.99197	1.20651	2.95573	6.62e-05	0.00326
Prpf39	66.6869	38.1507	37.4061	107.147	31.8076	39.7491	22.2224	25.4513	21.0301	1.03008	5.37877	6.68e-05	0.00327
Rev1	20.9136	16.6359	13.028	32.8883	12.7933	9.9627	10.2058	8.17733	5.81439	1.03554	3.81672	6.67e-05	0.00327
Tiam2	14.7316	10.7743	13.7682	15.5412	8.64604	6.45542	6.05765	2.85481	2.69024	1.2933	3.16104	6.77e-05	0.0033
Fam178a	72.277	42.2503	53.2963	69.3336	31.8779	45.8488	19.0618	14.7579	13.4223	1.19662	5.29311	6.82e-05	0.00332
Nrtn	9.63474	8.43652	7.649	7.71589	11.8795	23.026	10.963	19.7901	20.9144	-1.12175	3.76371	6.89e-05	0.00333
Nup205	10.1609	9.72402	11.893	14.4468	6.60754	6.96372	6.15642	4.6935	3.8184	0.950586	3.03368	6.89e-05	0.00333
Myo5b	85.496	71.4563	107.974	53.6829	52.9306	33.1921	37.7286	19.4998	19.1209	1.2615	5.74247	6.99e-05	0.00337
Il33	22.1303	21.4809	26.4014	48.1559	17.4327	19.2646	12.4445	10.5483	11.7156	0.93681	4.35368	7.02e-05	0.00337
Fnip1	36.7304	33.7122	35.5802	49.3051	27.5548	25.6184	22.2224	21.1933	17.3274	0.679109	4.88332	7.14e-05	0.0034
Lonrf3	2.79506	1.99901	2.56612	3.77586	1.5113	0.813282	1.02058	0.387092	0.694255	1.52995	0.814669	7.12e-05	0.0034
N4bp2	10.4568	4.16744	5.23093	9.57646	2.10879	4.67637	1.51441	0.919344	1.9092	1.65868	2.14409	7.13e-05	0.0034
Gpd2	57.2823	66.4079	78.8587	147.313	55.0746	43.2056	45.8274	26.1287	31.4729	0.994583	5.89075	7.21e-05	0.00342
Nbea	154.781	146.233	159.149	262.559	134.435	109.437	91.0952	68.225	70.4669	0.831572	7.01889	7.44e-05	0.0035
Rorb	11.542	12.0957	13.6695	82.3576	9.24353	7.82784	6.35395	6.77412	5.38048	1.85251	3.97654	7.45e-05	0.0035
Tns3	15.1262	15.179	18.407	26.2669	11.1414	12.6059	7.67083	6.8225	4.51266	1.05439	3.67507	7.44e-05	0.0035
Itgb8	22.8209	23.3105	26.056	65.5577	18.5925	18.1972	14.9466	11.9515	11.6288	1.05321	4.50561	7.48e-05	0.0035
Med12	8.9442	6.67467	7.99444	28.401	5.44771	5.13384	4.1811	3.04835	1.82242	1.57417	2.90783	7.54e-05	0.00352
Micalcl	3.48561	1.99901	3.94787	1.80585	1.05439	1.27075	0.296298	0.14516	0.376055	2.15811	0.727363	7.72e-05	0.00359
Slc6a11	16.3429	21.2776	30.8921	137.354	17.749	9.91187	13.3005	11.1289	10.0956	1.82866	4.77301	8.11e-05	0.00376
Tex15	3.05813	2.37171	4.54005	2.68141	1.26527	1.11826	1.3498	0.387092	0.925673	1.57247	1.01956	8.17e-05	0.00378
Cnksr2	229.228	192.414	251.43	273.996	182.797	145.476	97.8442	74.1282	77.3805	0.968503	7.37897	8.24e-05	0.00378
Lrig2	21.9988	21.4132	22.1081	31.1372	16.8352	11.4876	13.7285	12.0966	11.3395	0.779413	4.15661	8.22e-05	0.00378
Synpo	43.2084	38.6589	52.8028	54.3943	32.4051	24.1951	26.4035	11.4676	14.0876	1.05087	5.02671	8.25e-05	0.00378
Akap13	75.4995	45.8079	47.6706	108.296	39.0829	50.6268	26.2718	23.2739	22.3897	1.00123	5.55647	8.34e-05	0.00379
Alms1	5.49147	4.06579	5.08289	7.497	3.23348	2.84649	1.84363	1.40321	1.64886	1.24127	1.86898	8.34e-05	0.00379
Serf1	11.9366	8.8431	7.79705	9.74063	13.8477	24.5001	13.07	18.0966	19.7863	-0.97332	3.84358	8.29e-05	0.00379
Gcn1l1	37.684	35.474	40.1203	65.1747	27.1682	28.414	27.9837	16.4998	15.3893	0.851565	4.99461	8.4e-05	0.00379
Mlh3	24.5637	21.5826	21.0718	30.4258	14.9021	16.3673	15.5063	10.8386	9.37244	0.781122	4.17305	8.43e-05	0.00379
Rlf	29.2659	25.9533	29.0169	41.1514	20.9825	18.858	20.0824	13.4998	13.1908	0.760222	4.53641	8.43e-05	0.00379
Sec14l5	4.24192	2.87994	3.01025	7.497	1.93306	2.33818	1.21811	1.01612	0.723182	1.50642	1.43432	8.47e-05	0.0038
Dgat2l6	1.15091	0.271053	0.394787	0.766117	0.175732	0.15249	0	0	0.0578546	2.93085	-1.32452	8.64e-05	0.00386
Usp36	78.3275	43.8767	54.2339	49.1957	35.7791	36.4452	29.5969	23.1772	23.084	0.871853	5.36775	8.66e-05	0.00386
Ahctf1	26.7011	20.329	23.934	45.4198	16.2728	21.6536	11.9507	10.3063	10.2981	0.94673	4.33155	9e-05	0.00399
Zfml	535.961	265.733	469.205	150.268	190.74	135.869	63.2761	37.4512	37.7212	1.94339	7.71341	8.98e-05	0.00399
Ankfy1	25.8461	29.8158	32.718	57.5135	23.3021	16.469	21.2018	15.9192	12.4098	0.910866	4.67246	9.13e-05	0.00403
D330022K07Rik	0.723428	0.575987	0.444136	1.6964	0.140586	0.355811	0	0.0967731	0.115709	2.49883	-0.994785	9.15e-05	0.00403
Akap2	2.23605	1.08421	2.22068	1.53223	0.913809	0.254151	0.49383	0.387092	0.202491	1.88588	0.138054	9.42e-05	0.0041
Gprasp1	1950.72	1173.35	2101.9	803.985	820.178	782.631	314.636	218.03	235.642	1.67393	9.86335	9.42e-05	0.0041
Leng8	149.782	90.3622	95.6372	663.512	71.8746	101.914	54.3872	47.7575	30.8076	1.84051	7.04211	9.4e-05	0.0041
Nup153	34.8561	35.5079	41.9461	25.2819	21.2636	16.6214	21.0372	13.1128	11.7156	0.991723	4.6265	9.38e-05	0.0041
Phka1	21.8015	22.5651	24.9209	58.3891	18.6276	15.0965	15.9013	10.9837	9.69064	1.04749	4.40506	9.43e-05	0.0041
Adamts9	6.64238	4.30296	4.4907	13.9543	2.91716	4.01558	2.20577	1.40321	1.76456	1.45081	2.15525	9.46e-05	0.0041
Spata2l	43.2741	34.0171	36.3698	59.6477	31.1046	24.1951	25.6462	20.9514	19.1788	0.733747	5.00666	9.49e-05	0.0041
Adcy2	50.5742	42.0809	45.7953	104.301	37.2904	29.329	32.9549	17.7095	15.505	1.0706	5.32887	9.63e-05	0.00415
Sh3d19	10.3582	6.23421	7.40226	16.1432	4.21758	6.81123	3.16051	2.56449	3.03737	1.24246	2.69148	9.73e-05	0.00418
Nr3c2	64.3522	62.6471	69.7293	112.783	50.7164	56.6756	35.8521	23.7094	28.2041	0.898426	5.76938	9.8e-05	0.0042
Sec24d	9.24014	9.45296	11.4488	22.1079	8.08369	5.54048	5.59674	4.06447	4.10768	1.12544	3.1058	9.94e-05	0.00425
Vwa3b	1.28244	0.474342	0.592181	3.06447	0.175732	0.304981	0.395064	0.241933	0.144636	2.22404	-0.401158	0.0001	0.00427
Fnbp4	68.9887	37.2697	36.8633	90.0187	30.1908	42.1382	20.6421	22.5481	16.7489	1.04186	5.29131	0.000101	0.00429
Greb1l	8.18789	8.67369	7.649	12.422	4.67448	4.87969	5.36629	3.72576	3.84733	0.932956	2.71146	0.000102	0.00429
Nup214	33.0146	38.4217	39.2813	43.4498	28.3281	21.6028	22.6833	12.9676	14.1454	0.87678	4.8032	0.000102	0.00429
Zfp106	266.912	134.645	199.861	162.909	130.85	107.607	66.8317	42.7737	48.9739	1.22605	6.99456	0.000102	0.00429
Fezf2	9.53609	8.60592	10.4125	22.1627	6.95901	5.69297	5.56382	2.95158	4.4548	1.17238	3.04061	0.000103	0.0043
Taf1	63.9576	55.0576	70.7163	76.3381	46.4988	46.7637	39.1443	28.5481	34.626	0.68664	5.66587	0.000103	0.0043
Trio	450.498	147.758	273.045	119.241	117.038	131.091	61.0374	41.3705	47.7879	1.63061	7.26545	0.000103	0.0043
Sema3e	18.3159	21.4132	21.0224	36.8283	11.7038	14.5374	11.9507	4.01608	9.05424	1.15024	4.00878	0.000105	0.00435
1700024P16Rik	20.5848	7.01349	14.7058	3.72114	5.06109	2.694	1.21811	0.483866	0.723182	2.50888	2.66678	0.000105	0.00436
Grm3	13.9753	19.753	22.5029	66.4333	15.113	7.82784	11.819	8.9999	7.81037	1.39656	4.19857	0.000106	0.00438
Lama2	8.05635	5.99704	6.66203	27.9085	4.85022	5.2355	2.37038	3.29029	2.05384	1.61156	2.79047	0.000106	0.00438
Lrrc7	59.3211	61.5629	84.5338	79.8403	50.7164	37.2076	26.9302	14.0321	13.4223	1.27404	5.54364	0.000109	0.0045
Ralgapa1	109.04	99.0698	115.327	145.726	87.339	73.907	71.7041	45.193	48.135	0.762284	6.44274	0.000111	0.00456
Camkv	344.45	267.698	314.201	792.876	226.343	269.4	189.005	139.16	162.427	0.992197	8.16983	0.000114	0.00467
Scaf11	282.926	119.026	184.119	116.231	94.8955	115.283	51.7534	51.0962	50.7095	1.24544	6.87884	0.000114	0.00467
Rimbp3	1.44686	1.32138	1.08566	1.91529	0.527197	0.20332	0.757206	0.241933	0.289273	1.67917	-0.111472	0.000115	0.00469
Cacna1h	23.5443	15.8566	20.3315	32.4505	10.7548	18.6038	10.1071	7.83862	6.33508	1.02723	3.978	0.000116	0.00472
Rapgef2	79.5442	101.17	109.356	116.176	76.8654	53.7274	59.951	36.8706	35.1177	0.878243	6.19836	0.000118	0.00477
Dpyd	9.43744	13.6543	10.4125	26.6499	6.43181	7.37037	8.13174	5.70961	4.1366	1.11331	3.30619	0.000119	0.00481
Cdc42bpb	142.055	68.678	93.4659	31.9033	42.5975	35.5811	23.0125	10.645	10.356	1.78713	5.67479	0.00012	0.00482
Ep300	48.2724	40.8951	49.9899	59.1552	37.4662	31.9213	27.7862	20.4675	17.7614	0.796239	5.19146	0.00012	0.00482
Fam184a	79.4455	21.9553	34.0997	25.2819	15.7105	23.2802	12.5104	12.145	11.7445	1.37868	4.70754	0.00012	0.00482
Sncaip	3.18966	1.99901	2.41807	7.71589	1.47615	1.67739	1.02058	1.0645	0.694255	1.54956	1.19704	0.000124	0.00495
Tanc2	108.448	102.051	114.982	131.389	87.9014	76.8551	66.5683	48.4833	50.9699	0.71191	6.43384	0.000124	0.00495
Sema6a	13.2519	14.1625	16.1863	36.5547	11.8444	10.4202	7.96713	7.2096	5.38048	1.09931	3.71784	0.000125	0.00495
Stard13	13.2848	9.21579	9.91903	25.5007	8.25943	6.45542	6.05765	5.56445	3.38449	1.15515	3.23376	0.000126	0.005
Folh1	2.92659	2.91382	3.1583	10.2331	1.33557	2.33818	1.11935	1.25805	1.41744	1.53012	1.51303	0.000127	0.005
Tnik	226.499	74.8783	92.1828	187.918	58.8704	105.472	37.4652	30.7255	38.1551	1.35586	6.51377	0.000128	0.00503
Kdm5a	69.8437	53.6346	55.7143	97.5705	43.6168	52.2025	31.4076	37.7899	35.0599	0.688993	5.69714	0.00013	0.00508
Nrip1	68.068	76.5046	81.1288	110.157	62.7013	40.2066	52.4118	29.7577	29.5926	0.874568	5.91003	0.00013	0.00508
Shroom3	8.97708	6.77632	8.14249	9.68591	5.30712	1.98237	3.85188	2.90319	1.61993	1.32945	2.44805	0.000129	0.00508
Vill	0.394597	0.677632	0.444136	2.35307	0.175732	0.20332	0.230454	0.14516	0.115709	2.24742	-0.851194	0.00013	0.00508
Wdr90	8.61537	5.42105	8.33988	30.5352	4.14729	6.91289	2.9959	2.85481	2.5456	1.61196	2.91005	0.00013	0.00508
Arap2	51.1332	51.5	54.7767	83.2879	46.0068	37.5126	32.6257	29.8061	24.7328	0.720624	5.48724	0.000131	0.0051
Ep400	60.472	43.4701	43.3279	73.5472	39.1883	40.2574	24.5598	21.7739	21.088	0.824716	5.31961	0.000132	0.0051
Nptx1	146.297	168.493	203.167	189.778	118.092	85.0896	114.997	49.2091	52.3873	1.00919	6.95304	0.000132	0.0051
Cntnap5c	18.0857	14.2303	16.7291	27.1424	10.7197	13.165	10.6338	7.11282	8.24428	0.833154	3.77995	0.000133	0.00512
Olig2	10.3582	9.7579	12.6825	13.8995	5.90461	8.4378	5.2346	4.20963	5.43833	0.920885	3.06499	0.000137	0.00526
Slc4a4	69.9094	72.2694	92.1335	323.466	75.3541	41.4265	39.0455	40.6931	30.4894	1.43951	6.35102	0.000137	0.00526
Scd1	17.0006	20.0918	24.4768	55.8718	15.4645	17.3331	11.0289	9.14506	7.43431	1.15699	4.23994	0.000138	0.00527
Myst4	115.88	50.9579	71.6045	52.8621	37.7122	48.2886	17.5474	12.2902	12.9884	1.48714	5.5264	0.00014	0.00532
Spnb3	4998.62	3061.27	5192.83	3151.86	2314.96	683.919	306.833	127.74	256.093	2.45319	11.1075	0.00014	0.00532
Zc3h7a	78.2288	40.353	37.4061	85.9145	30.7532	44.9338	24.922	24.6288	22.6211	0.936266	5.39444	0.00014	0.00532
Igsf1	2.43335	2.43947	3.45439	4.81559	0.878662	1.62656	1.51441	1.11289	0.462837	1.46743	1.05521	0.000142	0.00537
2610029I01Rik	56.5918	53.3635	46.7329	50.9468	67.5164	92.7649	67.556	87.1442	96.0097	-0.745207	6.12076	0.000145	0.0054
9830001H06Rik	31.5349	11.9263	18.6043	28.0727	11.9498	14.6391	5.46505	4.93543	4.07875	1.39765	3.82507	0.000145	0.0054
A530058N18Rik	24.1691	19.6513	18.555	17.566	30.4369	37.8176	26.1072	38.3221	32.63	-0.794043	4.78748	0.000147	0.0054
Ank2	2981.94	2913.51	4970.96	2522.28	2222.56	1079.02	489.287	302.609	412.995	1.87835	10.9474	0.000145	0.0054
Clip2	258.888	131.664	236.922	44.7631	92.0135	40.6133	48.56	34.0157	29.2744	1.7715	6.691	0.000143	0.0054
Cnp	131.598	142.066	189.498	258.236	90.5022	143.138	101.531	80.2249	79.2608	0.775107	7.04462	0.000144	0.0054
Gm17388	7.43158	1.89737	1.67785	4.1042	0.878662	1.82988	0.230454	0.725798	0.520691	2.13299	1.10859	0.000145	0.0054
Gm20459	15.9154	10.2661	12.4358	2.9003	5.02595	1.62656	2.9959	2.32255	1.04138	1.97781	2.6371	0.000144	0.0054
Itga4	12.3312	5.59046	6.0205	17.7301	4.14729	5.69297	2.33746	0.967731	2.37204	1.64288	2.60954	0.000147	0.0054
Krt73	2.49911	1.93125	2.61547	4.37781	1.68703	0.711621	0.855972	0.629025	0.867819	1.44319	0.860493	0.000146	0.0054
Lmo7	640.168	299.75	485.144	237.387	203.533	126.008	37.2677	16.403	20.7409	2.37299	7.83175	0.000146	0.0054
Rpp25	62.6423	51.5339	42.8838	44.4895	77.006	88.9019	66.0745	87.3377	92.0756	-0.782798	6.10948	0.000146	0.0054
4932438A13Rik	70.0738	65.798	82.3625	117.435	54.5122	65.825	39.671	28.6932	29.4769	0.862864	5.90616	0.000148	0.00542
Gm98	13.4821	14.0609	20.1341	23.0382	8.61089	13.2667	8.95479	6.96766	5.17798	0.969604	3.6329	0.000149	0.00542
Sox8	18.0199	11.6214	16.5317	39.8381	8.04855	14.0799	8.85602	6.53218	4.04982	1.25807	3.75767	0.000148	0.00542
Heatr1	11.0158	12.1635	12.7319	20.3021	8.57574	7.31953	7.90128	4.98381	3.76055	1.01224	3.27395	0.000149	0.00543
Klf10	13.8438	15.5517	14.8539	34.0922	9.87616	9.60689	11.1935	4.83866	6.82684	1.07875	3.69906	0.00015	0.00543
Arpp21	100.754	54.1089	52.3093	156.835	32.3699	68.9256	27.852	16.4514	23.9807	1.32556	5.81714	0.000151	0.00546
Diap2	12.4298	11.6214	13.7682	41.2061	8.75148	9.09859	8.42803	6.14509	6.59542	1.17851	3.64508	0.000151	0.00546
Dock1	9.63474	8.80921	11.6956	42.6289	9.03265	6.2521	4.21402	4.01608	3.99197	1.54888	3.3836	0.000152	0.00546
Grin2a	41.4656	32.628	28.5727	62.6574	23.759	22.9244	19.3911	7.83862	6.94255	1.26494	4.72186	0.000153	0.00546
Ncor2	179.739	127.395	169.068	110.102	106.353	87.2245	61.1691	41.4673	43.8827	1.07369	6.67882	0.000152	0.00546
Spon1	29.8907	31.9503	28.5234	68.8411	25.6569	20.8912	21.0701	14.7095	14.4926	0.910665	4.78322	0.000153	0.00546
Tnfaip8l3	9.47033	12.5362	13.7682	15.3223	6.11549	7.52286	8.06589	4.49995	5.32262	0.9338	3.1897	0.000152	0.00546
Gm20515	2.23605	1.08421	1.4311	7.497	0.632637	1.37241	0.427986	0.387092	0.289273	2.15283	0.694617	0.000155	0.00553
Dab1	89.9681	68.4408	78.612	102.879	63.5097	60.742	48.4283	35.7577	36.2459	0.71643	5.99839	0.000159	0.00563
Cpne2	15.4222	18.2622	18.0615	43.997	9.38411	12.5042	12.9713	7.5483	10.6742	1.02787	3.9983	0.00016	0.00564
Mga	89.0474	79.7234	93.2191	84.3823	52.4386	67.8074	22.0248	20.7094	19.6995	1.21827	5.8516	0.000159	0.00564
Ranbp2	97.5641	64.2056	78.2666	80.0592	47.3775	66.8924	32.3294	23.1288	25.0221	0.996135	5.81391	0.00016	0.00564
Tet2	62.708	33.8816	30.6947	97.5705	31.1046	34.3612	21.531	15.0966	15.2158	1.1435	5.1851	0.00016	0.00564
Gab1	14.9618	15.4839	16.433	46.0765	11.036	14.0799	8.2305	7.45153	5.03335	1.21421	3.87512	0.000162	0.0057
Snapc4	32.8502	28.6638	32.3726	59.593	25.7975	20.942	21.3993	16.0159	10.5874	0.910274	4.74549	0.000165	0.00576
Slc7a10	15.9812	13.2816	13.6202	73.8756	9.70043	10.0135	9.8766	8.56442	5.75653	1.53437	4.0484	0.000166	0.00581
Acss1	24.3664	21.3793	22.5029	91.4415	16.4134	19.3154	12.247	12.145	12.6702	1.28121	4.60154	0.000167	0.00584
Ptprk	20.0258	15.9243	15.8408	51.9865	11.3875	16.7231	6.97947	5.12897	4.65729	1.4144	3.96239	0.000168	0.00586
Rasgef1b	3.48561	2.84605	4.19461	6.89505	1.5113	2.18569	2.10701	1.25805	1.53315	1.21674	1.51959	0.000169	0.00586
Bcl11a	52.7773	39.777	48.7562	77.9798	34.8302	43.2564	27.7533	21.6772	22.7947	0.775536	5.32461	0.00017	0.00588
Chdh	2.03875	1.15197	2.07263	5.03448	0.667783	1.37241	0.691362	0.290319	0.376055	1.80454	0.578788	0.000171	0.00592
Gpm6b	394.893	377.272	453.611	1063.21	314.702	343.713	258.734	217.691	225.112	0.938275	8.60468	0.000172	0.00592
Prickle2	102.957	109.166	123.272	147.915	93.4897	71.1621	68.379	38.9512	44.7794	0.853117	6.45071	0.000173	0.00597
Herc2	116.011	95.3089	111.33	164.551	79.5717	100.898	54.2225	53.7575	57.9124	0.727821	6.50179	0.000175	0.00602
Atp13a4	7.39869	4.03191	5.67507	35.5697	3.93641	4.42222	2.86421	2.08062	2.31418	1.87035	2.79746	0.000177	0.00605
Sdk2	7.56311	3.96415	3.60243	12.3126	2.84687	3.55811	1.74487	2.17739	2.02491	1.34375	2.09978	0.000179	0.00611
Clmn	543.393	136.238	220.193	178.834	129.585	107.912	27.1277	17.3224	26.3528	2.11986	7.24406	0.000183	0.00625
Gabra5	66.9499	72.8115	83.8923	108.953	55.9532	47.2212	56.988	28.0642	29.5637	0.844566	5.90868	0.000184	0.00626
Ints6	25.583	22.599	22.0587	37.7586	17.7138	12.0467	18.0413	10.8386	8.96746	0.890085	4.26023	0.000185	0.00627
Fam59b	8.48383	8.40263	12.5345	33.7639	5.83432	5.28633	5.33337	7.30637	4.33909	1.31798	3.27322	0.000187	0.0063
Serinc5	22.1632	21.6842	24.5262	53.6829	16.3431	18.0955	16.7902	11.0321	8.50462	0.987691	4.36894	0.000187	0.0063
March7	70.9946	60.0382	59.2674	80.0045	52.1574	42.1382	43.1937	33.7738	29.7951	0.663461	5.6936	0.000188	0.00633
4930503L19Rik	11.7393	7.08125	6.76073	15.5412	5.44771	4.82886	5.36629	3.62899	3.84733	1.03065	2.80918	0.000191	0.00638
Narg2	13.219	9.24967	8.24118	13.6259	5.90461	6.96372	6.22226	4.45156	3.96304	0.926045	2.9819	0.00019	0.00638
Shfm1	86.6469	63.8668	63.3633	61.3441	86.9524	179.888	86.9141	128.757	157.191	-0.964323	6.6838	0.000191	0.00638
Cdh8	35.711	28.2911	31.8791	45.0367	22.9155	23.0769	24.1648	17.4192	14.8397	0.690611	4.73629	0.000195	0.0065
Cep250	176.418	45.0964	70.4695	49.2504	32.5105	48.7969	13.498	7.98378	10.5874	1.91641	5.63997	0.000197	0.00655
Spnb2	6644.19	4483.01	7741.48	4483.32	3588.42	1517.69	501.04	292.448	516.092	2.17048	11.6755	0.000198	0.00657
Vipr1	4.30768	4.13355	4.04657	8.2084	1.44101	3.76143	1.6461	0.822571	0.896746	1.52443	1.66602	0.000198	0.00658
Atp11b	55.3422	43.4701	41.8968	141.896	34.4787	42.3415	30.1566	26.661	20.683	1.05118	5.52897	0.000202	0.0067
Fam59a	42.2876	46.1128	51.3717	77.4325	39.1883	19.7221	33.0208	16.5966	16.5175	1.01187	5.21852	0.000203	0.00671
Anapc1	36.7633	47.0954	52.0626	73	33.0728	23.636	36.4447	19.9353	17.0092	0.903713	5.20861	0.000204	0.00672
Pik3c2a	21.0452	19.753	17.3213	37.8681	15.0427	16.2148	11.2593	8.17733	7.08719	0.953501	4.05077	0.000205	0.00672
Sidt1	19.3681	20.2612	21.0718	27.2519	12.4419	14.3849	13.8272	7.59669	5.4094	0.963796	3.95176	0.000205	0.00672
G2e3	16.9019	9.65625	8.58662	20.7946	8.36486	7.77701	5.79427	5.46768	4.4548	1.0268	3.25192	0.000206	0.00674
Thoc2	56.3616	42.1487	41.2553	86.407	31.9833	44.2222	26.996	28.2094	25.5717	0.742339	5.37279	0.000207	0.00675
Cpd	39.1309	41.0645	44.0188	77.5967	33.1783	26.6858	33.1195	19.1611	19.0342	0.829927	5.17463	0.000207	0.00676
Trpm7	59.7814	37.8119	38.7878	70.2639	32.8971	39.5967	23.9014	20.6611	16.4886	0.868748	5.20264	0.000209	0.00681
Atp1a1	52.7116	51.7372	70.9137	141.458	48.3616	35.4286	45.4324	26.032	26.5263	0.989325	5.74057	0.000211	0.00684
Nr4a2	16.4744	12.5023	15.7421	26.6499	13.1096	8.84444	7.67083	5.17736	6.13259	1.01588	3.60822	0.000213	0.00689
D14Abb1e	47.9435	30.629	34.5932	54.5585	24.954	34.8186	19.7203	17.6127	18.1953	0.780315	4.94454	0.000213	0.0069
0610007P08Rik	23.3141	12.2651	16.285	15.0487	10.4034	9.75938	8.46096	6.87089	5.20691	0.98218	3.57499	0.000214	0.0069
Tmem229a	34.9876	40.3191	44.8577	119.076	35.8846	24.5001	24.1318	25.4997	19.1209	1.05731	5.29215	0.000222	0.00713
BC057079	24.9911	30.4934	29.7077	40.2211	18.8034	16.0115	22.354	13.7418	8.96746	0.884076	4.49052	0.000223	0.00716
Fbxo10	27.2601	31.3744	35.2348	38.4153	21.5097	12.3517	23.4405	12.9676	11.9759	0.916524	4.56468	0.000224	0.00716
Hrk	19.7956	15.9582	17.9135	38.47	13.426	14.6899	9.15232	5.56445	9.31459	1.02691	3.95566	0.000224	0.00716
Efnb3	48.4697	43.775	54.8261	86.5712	31.4561	42.7481	34.8315	16.9837	24.1254	0.863215	5.37646	0.000225	0.00716
Shprh	46.0034	35.3046	33.6063	52.6979	28.2578	31.2605	25.0207	17.0321	17.3564	0.734092	4.96742	0.000225	0.00716
Zfp521	3.8802	3.18487	4.54005	16.3621	2.60084	2.33818	2.27162	0.919344	0.694255	1.821	1.94237	0.000225	0.00716
Aldh1a1	15.5208	15.8227	16.8772	48.3201	13.0042	12.0976	9.97537	9.14506	6.33508	1.11022	3.96476	0.00023	0.00719
Arc	60.8666	42.2503	56.7013	102.496	43.1599	28.3124	36.2471	14.274	14.6372	1.15558	5.42243	0.000228	0.00719
Chrm5	0.394597	0.914803	0.542832	1.03973	0.281172	0.254151	0.197532	0.0967731	0.115709	1.81087	-1.03257	0.00023	0.00719
Galnt3	7.9577	3.28651	3.25699	6.18366	1.58159	3.65977	1.0535	1.0645	0.867819	1.61125	1.66857	0.000229	0.00719
Hip1	31.7979	16.7036	37.2087	52.0412	22.072	19.1121	9.1194	8.17733	5.87224	1.33828	4.438	0.000228	0.00719
Lyst	18.8091	12.5701	12.3864	26.3216	10.7197	11.8434	5.99181	6.33864	6.94255	0.963781	3.59951	0.000229	0.00719
Sntb2	14.7645	8.67369	9.32685	24.1327	7.0293	8.79361	6.18934	4.6935	5.03335	1.04201	3.25378	0.000229	0.00719
Zfp407	9.27303	10.5372	8.29053	23.8043	7.59164	6.81123	4.87246	3.67738	3.84733	1.14574	3.07627	0.000228	0.00719
Fat4	9.07573	5.35329	5.13223	20.521	3.33892	6.2521	2.04116	1.88708	2.31418	1.5346	2.55739	0.000234	0.00726
Gm13889	78.7879	56.1418	51.5197	53.6829	80.5206	121.281	78.0581	110.708	127.164	-0.865122	6.41642	0.000234	0.00726
Ogt	270.562	198.411	202.378	401.664	165.681	196.255	149.17	129.144	124.503	0.702707	7.63648	0.000234	0.00726
Plekha7	11.0816	9.58849	13.2747	14.9393	8.40001	4.26973	5.59674	6.19348	4.1366	0.997264	3.09782	0.000234	0.00726
Tomm5	49.8179	34.9997	34.7906	33.9828	53.2469	101.457	44.2143	71.854	83.4842	-0.949964	5.83319	0.000235	0.00726
Znfx1	24.6294	24.598	31.583	29.0577	21.0527	12.8092	16.0001	10.9354	10.2403	0.875635	4.32221	0.000235	0.00726
Dleu7	25.879	23.3444	20.0848	18.934	32.2996	46.2554	28.3129	35.7093	39.7461	-0.788466	4.92781	0.000236	0.00728
Klhl5	33.1461	25.4112	31.7804	80.7706	25.3406	23.1785	19.0948	17.3708	15.2158	0.952586	4.85599	0.000237	0.00728
Pld2	8.5496	7.65724	8.63597	32.2864	5.93976	5.48965	4.37863	5.61284	3.06629	1.37128	3.09881	0.00024	0.00736
Mc4r	3.32119	1.99901	2.22068	3.00975	0.843516	1.11826	0.888894	1.20966	1.18602	1.23145	0.854318	0.000241	0.00737
A330050F15Rik	54.4873	52.8553	47.8186	37.1567	70.539	81.7348	70.6506	84.4829	90.3978	-0.793436	6.0607	0.000244	0.00742
Man1a	14.1068	12.5023	14.9032	41.8628	11.7741	9.50523	8.75725	4.93543	5.26477	1.22778	3.71123	0.000243	0.00742
Ttc21b	20.9794	13.6543	14.3604	22.6552	10.1222	11.7418	10.3375	9.14506	8.53355	0.749069	3.7384	0.000244	0.00742
Vwa5b1	1.08514	2.06678	3.65178	3.83058	1.19498	0.508301	0.65844	0.967731	0.347127	1.74383	0.682243	0.000244	0.00742
Gm13543	1.34821	0.406579	0.0986968	3.94003	0.105439	0.355811	0.098766	0.14516	0.0578546	3.06393	-0.476342	0.000248	0.00752
Mas1	18.3159	12.6378	17.1239	17.6754	9.27867	12.0976	9.1194	5.99993	7.2029	0.842987	3.59354	0.000249	0.00752
Ngef	27.1614	25.479	30.8921	93.521	21.9314	21.8061	20.0166	10.7902	12.8148	1.18683	4.79967	0.000252	0.00762
2900010M23Rik	85.3316	63.799	67.2125	66.1049	91.2051	176.685	82.305	127.353	149.149	-0.898629	6.67201	0.000255	0.00765
Pcsk5	5.42571	4.20132	4.4907	9.30285	2.81172	3.35479	2.33746	1.93546	2.40097	1.06876	1.99008	0.000254	0.00765
Jun	52.4814	52.0082	60.4518	205.046	42.5624	38.2751	42.8645	28.3061	30.5761	1.16611	5.85961	0.000258	0.00772
Unc13a	112.066	107.642	123.963	183.978	96.1959	86.5637	80.0992	52.6446	63.2351	0.701458	6.62588	0.000258	0.00774
Plxnb3	10.1609	7.1829	8.63597	21.7796	4.21758	8.9461	2.60084	2.37094	2.42989	1.44461	2.85626	0.000262	0.00781
Gm13205	8.91131	5.72599	5.37898	5.85532	11.6335	13.8258	8.2305	14.1773	14.5504	-1.02501	3.32604	0.000265	0.0079
Znrf3	11.7721	6.8102	8.58662	29.0577	5.13139	8.03116	4.24694	4.83866	4.25231	1.25769	3.1284	0.000266	0.00791
Nav3	60.6035	59.5977	66.2749	60.3591	47.3423	29.5323	37.2019	22.161	16.0546	0.958798	5.45976	0.000268	0.00797
Cacna1e	37.8813	19.7191	22.4535	46.952	10.5791	25.5167	6.55148	3.87092	5.26477	1.56293	4.24839	0.000272	0.00806
Ankrd28	15.9483	13.9931	16.4824	29.4408	12.477	10.776	9.84368	7.01605	4.94657	0.969839	3.70971	0.000274	0.0081
Numa1	36.5331	35.2707	40.1696	85.1484	29.8042	31.3622	26.0742	16.2095	19.5838	0.879713	5.1039	0.000274	0.0081
Spg11	8.02347	8.02994	8.83336	13.5712	5.48285	3.50728	5.95888	3.43545	2.34311	1.10522	2.6988	0.000275	0.0081
Hif3a	1.08514	1.25362	1.87524	3.66642	1.01925	0.457471	0.296298	0.532252	0.404982	1.7034	0.246756	0.000278	0.00818
Pfdn1	78.3933	61.0207	58.1818	57.2946	85.5114	145.272	76.1815	109.354	121.726	-0.823889	6.47492	0.000279	0.00819
Cacna2d1	27.1285	24.4625	28.2766	58.6079	17.8544	26.8891	14.6832	9.3386	11.0213	1.01588	4.54488	0.000284	0.00833
Tia1	144.62	70.4737	70.0747	195.031	52.2277	95.8656	34.8973	31.9835	32.5432	1.18483	6.27206	0.000286	0.00835
Camk2n2	120.582	101.475	96.7229	70.1544	136.333	208.556	134.19	192.385	198.297	-0.89847	7.15108	0.00029	0.00845
Dpcd	63.6945	52.1099	50.9769	59.3193	71.6285	116.452	65.3831	90.4345	102.345	-0.740276	6.23378	0.000291	0.00847
Add3	63.2342	66.5434	82.4612	190.982	62.8419	47.8311	48.2966	43.0156	34.6838	0.947434	6.09491	0.000292	0.00847
2310061C15Rik	45.7404	37.6763	35.9256	28.3463	47.8695	83.0056	49.9098	70.6928	80.8228	-0.911423	5.7608	0.000292	0.00848
Map3k14	8.25365	5.15	4.5894	11.054	4.60419	2.89732	2.50207	2.56449	1.41744	1.26726	2.22984	0.000293	0.00848
Itih3	8.51672	7.99606	9.82033	41.1514	6.60754	7.82784	4.1811	4.16124	3.52913	1.50734	3.27922	0.000293	0.00848
Ust	25.1884	27.0036	27.5858	43.8328	21.5448	14.3341	20.1153	10.016	11.4263	0.890124	4.45463	0.000294	0.00848
6330503K22Rik	86.8442	52.8214	60.3037	102.167	50.857	55.7606	40.3295	37.1609	35.9855	0.68205	5.82937	0.0003	0.0085
Gm17338	1.61127	1.08421	0.29609	2.02474	0.562344	0.304981	0.16461	0.193546	0.144636	2.06503	-0.395406	0.000297	0.0085
Mxra7	177.667	146.131	135.264	122.633	206.907	274.076	185.417	267.723	296.071	-0.832548	7.67532	0.0003	0.0085
Nek5	0.986492	0.474342	0.93762	5.69115	0.421758	0.508301	0.197532	0.338706	0.289273	2.29731	0.0613652	0.000299	0.0085
Pcp4l1	514.85	441.172	403.176	351.757	608.034	827.26	586.111	793.83	748.609	-0.802889	9.21303	0.000299	0.0085
Ralgps1	28.0821	32.1536	27.9805	53.464	22.9155	24.6526	20.5763	13.7902	15.8232	0.751776	4.70011	0.000298	0.0085
Rasgrp1	141.463	181.097	202.476	216.702	126.949	86.2079	110.684	40.2092	41.0478	1.1279	6.9688	0.0003	0.0085
Rnd2	131.105	124.921	115.969	106.49	161.568	212.063	163.952	188.079	188.924	-0.681491	7.2893	0.0003	0.0085
Spice1	17.9542	9.58849	13.9162	12.6409	8.50545	8.38697	6.22226	5.66123	4.48373	0.966418	3.27462	0.000299	0.0085
Suv420h1	48.2724	40.0819	40.0216	63.4783	30.5774	38.885	28.708	24.9191	23.4311	0.620491	5.20746	0.000297	0.0085
Nfib	138.832	114.486	123.519	293.751	95.5633	122.907	77.6301	66.4831	67.1981	0.843008	6.87941	0.000304	0.00858
Fads2	22.0974	26.6309	32.6193	112.127	23.0561	15.859	17.8108	16.8869	13.0751	1.2954	4.8733	0.000305	0.0086
Sstr4	13.8767	9.45296	11.3501	21.4513	10.1573	6.91289	5.69551	4.20963	4.25231	1.05854	3.24395	0.000306	0.0086
Hbxip	77.8014	63.0875	59.2181	62.7121	84.8436	146.035	76.6754	111.773	124.879	-0.801203	6.49937	0.000307	0.00861
Dusp18	14.4686	10.4694	12.2384	24.5157	8.43516	7.4212	8.03297	2.41933	4.85978	1.19111	3.32645	0.000307	0.00862
Cdk12	177.897	66.4079	128.553	50.4543	60.3465	41.0707	11.6215	8.90313	9.86421	2.01466	5.9427	0.000308	0.00862
Myo1b	18.7762	12.4345	17.2719	36.0622	10.7197	15.7065	8.16466	7.06444	5.95902	1.046	3.8217	0.000308	0.00862
2010107E04Rik	161.719	122.719	111.577	92.7001	153.45	344.882	160.89	260.368	286.814	-1.04002	7.57593	0.00031	0.00863
4922501L14Rik	55.9341	18.9059	32.2739	14.6657	17.046	12.7075	5.36629	2.70965	3.99197	1.86233	4.18401	0.000311	0.00863
Gm4392	2.10452	3.93026	5.08289	2.46252	1.89791	0.559131	1.21811	0.629025	0.376055	1.80602	1.07067	0.000311	0.00863
Pcbd2	12.9888	9.79178	9.86968	10.6162	15.0427	25.1609	13.926	17.8546	20.9723	-0.853559	3.93763	0.000311	0.00863
Flna	49.6534	17.8556	26.5494	127.668	21.9666	28.719	10.14	8.51603	8.01286	1.69533	4.94031	0.000313	0.00867
Ucp3	1.5455	0.880921	0.93762	6.12894	0.667783	0.711621	0.263376	0.0483866	0.376055	2.31605	0.301372	0.000316	0.00872
Tubgcp6	31.5349	32.7635	34.3465	41.5345	24.1808	17.8922	25.3499	12.5805	14.2901	0.806374	4.68929	0.000317	0.00875
Aldh1l1	20.4204	23.5138	29.2143	85.5862	19.9632	12.3517	14.1235	17.4192	12.8148	1.19377	4.63775	0.000321	0.00881
Gm12408	0.822077	0.779277	0.29609	0.656672	1.58159	1.82988	1.02058	2.08062	2.2274	-1.51379	0.444563	0.00032	0.00881
Phf20l1	95.4267	68.949	84.9779	94.506	67.657	63.6901	40.5599	40.3544	37.403	0.714639	6.02515	0.000321	0.00882
Acyp1	41.5971	35.474	32.7673	29.4408	45.585	82.0906	42.5352	61.9832	75.4134	-0.887256	5.65337	0.000322	0.00882
Atp5k	147.908	104.897	99.1409	92.3718	136.087	288.918	144.33	224.514	258.35	-0.989415	7.39599	0.000325	0.00887
Gm9752	12.6929	5.18388	3.89852	15.3223	3.83097	5.13384	1.11935	1.30644	1.12816	1.80618	2.40219	0.000325	0.00887
Gm17709	0.85496	0.914803	0.690878	2.84558	0.527197	0.355811	0.395064	0.241933	0.202491	1.75743	-0.313051	0.000328	0.0089
Lingo2	13.6794	16.0938	14.8539	44.2706	9.9816	12.5042	11.2264	7.30637	6.30615	1.08952	3.85511	0.000328	0.0089
Nfatc3	11.1802	7.65724	9.08011	16.964	7.27532	5.69297	5.2346	4.93543	3.64484	0.954357	2.96528	0.000327	0.0089
Prdm8	36.3358	25.4112	34.2478	37.4303	19.5063	27.1433	19.2923	11.516	13.5958	0.808444	4.62062	0.000329	0.0089
Xrn1	16.0469	12.9766	15.0019	28.6747	11.4578	12.0467	8.88894	6.04832	5.93009	0.929865	3.6612	0.000329	0.0089
Wbp7	108.317	31.9842	56.9481	33.3261	23.9699	37.411	9.94245	6.87089	8.85175	1.73374	5.12664	0.00033	0.00892
Usp40	14.3041	7.96217	7.35291	20.0285	5.69373	8.13282	5.33337	3.29029	2.77702	1.19883	3.00806	0.000332	0.00894
Timm8b	120.319	84.0602	85.6688	79.4573	126.457	234.632	107.754	173.95	183.92	-0.903142	7.06745	0.000338	0.00909
Gpsm2	9.43744	7.11513	8.24118	15.5412	5.9749	5.54048	5.33337	3.67738	3.52913	0.95343	2.81092	0.000341	0.00913
Lass2	36.9935	23.175	27.191	94.8891	20.8067	27.8041	16.461	16.3063	11.6577	1.14702	4.85485	0.000342	0.00913
Npy2r	22.8866	26.6309	31.1882	32.2864	18.5222	17.943	18.0083	10.3063	14.2033	0.758003	4.40469	0.00034	0.00913
Usmg5	182.37	136.882	129.688	109.062	185.363	397.898	172.939	274.981	305.646	-0.994218	7.73268	0.000349	0.0093
Chd7	34.9547	18.2622	23.9833	68.7864	16.3431	25.8217	8.09881	11.8063	9.51708	1.23261	4.52153	0.000353	0.00941
Jak2	21.8344	21.9892	23.1444	39.0172	18.8385	14.2324	15.5721	10.016	7.60788	0.89829	4.2254	0.000354	0.00941
Ppp1r9a	6153.11	3218.24	5342.75	1353.95	2027.92	479.887	251.886	63.5315	185.771	2.74812	11.059	0.000355	0.00942
Cachd1	15.192	14.2303	17.8641	39.8381	12.3716	11.1826	10.0083	3.77415	5.14906	1.23648	3.78776	0.000356	0.00942
Rbp4	13.9424	13.5865	9.32685	15.8148	26.7816	23.2294	16.5927	17.7095	34.9442	-0.967235	4.28151	0.000356	0.00942
Cpne7	206.604	113.436	136.448	572.563	82.77	148.119	89.1857	92.999	76.397	1.22898	7.30692	0.000357	0.00943
Atp6v1g1	113.381	104.931	89.8634	115.629	122.169	227.363	126.717	183.53	219.934	-0.820832	7.1912	0.00036	0.0095
Sox10	24.7938	13.9592	20.7757	24.4063	12.4419	16.0623	10.568	8.51603	6.76899	0.882438	3.91946	0.000364	0.00959
Akap6	244.88	252.147	347.067	310.551	250.348	144.662	93.0047	81.87	81.6039	1.08946	7.62846	0.000366	0.00962
Gli1	0.789194	0.474342	0.93762	1.6964	0.386611	0.355811	0.065844	0.290319	0.144636	1.85608	-0.711993	0.000367	0.00963
Coro2a	7.16851	7.42007	11.7449	10.1784	6.08034	4.37139	3.95064	4.11286	3.182	0.994566	2.69237	0.000372	0.00968
Prkdc	18.842	11.9941	14.0149	40.1664	8.5406	16.0115	6.18934	4.79027	5.84331	1.24805	3.74	0.00037	0.00968
Rel	0.986492	0.813158	1.4311	2.18891	0.492051	0.0508301	0.559674	0.387092	0.260346	1.7616	-0.251148	0.00037	0.00968
Tomm7	52.7445	38.1507	39.1826	30.9183	51.4545	101.762	52.6752	76.6443	91.6417	-0.95558	5.91502	0.000371	0.00968
Gm17262	1.08514	0.609869	0.592181	5.69115	0.456904	0.15249	0.263376	0	0	3.25137	-0.0963177	0.000373	0.00969
C230034O21Rik	1.08514	0.609869	0.93762	1.53223	0.316318	0.20332	0.526752	0.241933	0.3182	1.51295	-0.513736	0.000373	0.00969
Adora1	124.298	108.862	133.635	182.992	99.4646	87.8852	90.3709	49.3059	52.908	0.766137	6.66234	0.000375	0.00971
Gm10309	1.47974	0.745395	0.29609	1.53223	0.210879	0.508301	0.263376	0.0967731	0.144636	1.96381	-0.638729	0.000376	0.00971
Hipk2	60.0116	67.3905	86.9519	81.2631	54.6176	36.801	47.276	29.0803	19.8441	0.909887	5.73146	0.000376	0.00971
D4Wsu53e	1188.07	353.792	413.54	1864.4	349.286	579.667	225.45	253.642	207.9	1.43299	9.14823	0.000378	0.00975
Zfp750	0.920726	0.237171	0.345439	1.14918	0.105439	0.0508301	0.16461	0.14516	0.173564	2.12867	-1.22396	0.000381	0.0098
Adcy9	34.9547	28.0878	27.8325	44.1064	21.1582	27.1941	20.4116	14.3708	15.4182	0.689383	4.67191	0.000385	0.00982
Copa	336.657	350.878	412.01	299.989	248.099	136.733	229.894	160.982	128.871	0.887797	8.00056	0.000385	0.00982
Cyp2j9	10.8514	8.33487	8.98141	32.9978	7.4862	5.43882	5.89304	5.08059	5.23584	1.21241	3.25778	0.000386	0.00982
Hepacam	26.0434	23.6155	30.596	112.4	21.1582	20.1796	17.9096	16.5966	14.8686	1.22523	4.88827	0.000385	0.00982
Ndufc1	194.635	148.503	141.778	122.688	195.274	372.229	194.009	288.384	338.825	-0.935582	7.81214	0.000386	0.00982
Nptxr	22.8537	29.3415	34.988	34.4205	19.19	12.6059	22.0577	9.87086	9.95099	0.963603	4.42902	0.000383	0.00982
Zbtb20	298.414	200.206	252.17	553.684	160.268	261.419	81.7124	70.4508	71.7975	1.25099	7.68884	0.000384	0.00982
Ctdspl2	25.6817	22.0908	22.8977	42.6837	16.8352	18.1463	17.6133	14.274	14.7818	0.677755	4.40986	0.000388	0.00984
Wwc1	66.3581	60.7158	69.0384	98.8838	58.8704	48.4411	43.6217	34.5964	29.6794	0.685455	5.79873	0.000389	0.00985
Rfx3	37.0921	20.3628	26.5988	65.9408	18.2059	28.3124	12.8067	8.80635	9.7485	1.16425	4.59567	0.000391	0.00989
Slc4a7	34.5601	24.5642	24.2794	40.3853	18.9791	24.9068	17.2841	14.516	14.0876	0.698167	4.54268	0.000392	0.0099
Gm11398	2.99236	1.55855	1.82589	8.75562	1.5113	1.27075	0.98766	0.870958	0.665328	1.65303	1.12301	0.000393	0.0099
Rapgef6	50.0152	28.4944	26.5494	66.4333	20.2444	35.8352	14.0577	11.3708	12.0048	1.11157	4.82311	0.000394	0.0099
Bola3	36.5002	30.7984	32.5206	31.7391	42.3867	62.0636	39.8356	52.8865	59.7059	-0.72063	5.44837	0.000394	0.00991
2010300C02Rik	115.814	110.725	127.368	179.654	91.6269	66.5874	71.8687	24.4352	25.7453	1.17322	6.45975	0.000395	0.00991
5133401N09Rik	41.1038	32.7635	30.7441	29.3861	43.6519	76.8043	38.848	62.9993	72.1157	-0.88447	5.59249	0.000397	0.00992
Trp53bp2	24.5965	21.5148	27.9312	58.4438	20.3147	19.5188	15.177	16.403	11.6288	0.868003	4.53371	0.000396	0.00992
Morc2a	29.4961	30.2563	26.7962	46.4595	22.2829	16.6723	23.9343	13.2579	12.4387	0.80246	4.59646	0.0004	0.00999
Clip1	2652.48	838.027	1482.28	304.422	617.137	455.184	137.943	84.6281	105.44	2.26258	9.54124	0.000401	0.01
Pkib	34.9218	30.5951	28.2273	26.7046	41.262	55.659	36.9385	53.7575	50.536	-0.731401	5.33461	0.000402	0.01
Gm17417	2.49911	0.779277	1.03632	2.02474	0.562344	0.762452	0.131688	0.0483866	0.115709	2.24622	-0.110001	0.000405	0.01
Gm16432	1.38109	1.72796	1.33241	3.66642	0.632637	0.609961	0.954738	0.435479	0.75211	1.40283	0.381912	0.000406	0.0101
Acvr2a	29.7592	26.6987	23.8846	54.449	22.9155	18.553	18.6668	16.1611	15.6786	0.745915	4.61983	0.000408	0.0101
Gng12	17.165	19.3464	26.8949	65.3388	16.8352	17.0281	14.2223	9.67731	9.14102	1.12307	4.37344	0.000409	0.0101
Dnahc9	12.2654	5.99704	6.1192	25.3913	3.83097	8.18365	3.55558	2.56449	2.69024	1.45171	2.8911	0.00041	0.0101
Fzd7	2.66353	3.89638	4.24396	9.30285	2.4954	1.98237	2.10701	1.49998	1.33066	1.2738	1.68226	0.000412	0.0101
Atad2b	35.711	21.0743	31.0401	25.2819	14.9021	22.2128	5.13583	5.22575	6.6822	1.36649	4.19441	0.000413	0.0102
Srp14	121.141	97.9178	95.7359	98.0082	127.16	228.126	124.445	171.724	204.4	-0.804341	7.15301	0.000417	0.0102
Tgfbr1	12.5613	7.62336	9.52424	22.9835	7.34562	8.38697	4.67493	3.29029	3.52913	1.16226	3.09678	0.000426	0.0104
5830418K08Rik	96.9722	36.4566	62.9192	43.6139	32.159	30.5489	7.53914	4.11286	6.13259	1.89657	5.13294	0.000427	0.0105
Dexi	131.006	106.32	103.928	106.654	142.449	219.688	134.157	188.949	210.417	-0.755557	7.23727	0.000431	0.0105
Phc1	19.9271	16.2293	17.7654	28.7841	13.9883	14.4866	11.1935	8.08055	6.53757	0.8416	3.8973	0.000431	0.0105
Wbp5	80.3334	70.101	58.0831	70.3733	84.0353	142.833	83.2927	119.418	140.471	-0.793217	6.57486	0.00043	0.0105
Gm12258	17.4609	12.0957	11.054	16.964	10.0519	7.62452	8.29635	5.90316	5.14906	0.871719	3.38097	0.000432	0.0105
Mrps33	21.9001	18.8382	17.3706	17.6754	23.6184	41.3249	24.0989	31.2093	38.1262	-0.81428	4.72029	0.000436	0.0106
Tbca	42.9124	33.4072	31.583	23.8591	42.4921	83.2597	44.3459	62.1767	76.9755	-0.966768	5.63812	0.000437	0.0106
Slc9a4	6.28067	5.79375	6.1192	8.48201	2.70628	4.93052	3.5885	1.88708	1.88027	1.08398	2.19745	0.000439	0.0106
Cox6a2	82.4708	70.8125	72.7889	54.7226	78.939	138.766	105.647	157.014	166.939	-0.956977	6.71884	0.000441	0.0107
Eml6	17.0663	12.2313	12.0904	31.2466	10.4385	12.2501	7.63791	6.91928	6.19044	0.945439	3.63999	0.000442	0.0107
Cd46	2.03875	0.677632	0.690878	3.3928	0.59749	0.711621	0.16461	0.241933	0.202491	2.02171	-0.0322388	0.000444	0.0107
Dscam	24.4321	31.4082	40.3176	34.4753	21.3691	15.4524	21.2676	8.41926	8.07071	1.06922	4.49897	0.000446	0.0107
4632427E13Rik	96.0515	39.9464	29.8558	138.995	20.6661	54.6932	8.5268	11.4192	8.90961	1.79025	5.41073	0.000449	0.0107
Fgfr3	39.9201	38.8283	49.5951	217.085	38.872	30.5489	22.0577	28.5481	23.6625	1.38794	5.65888	0.000449	0.0107
Tcf20	24.0046	19.5158	28.0299	25.063	18.944	14.7916	11.9507	8.37087	8.35999	0.890505	4.13197	0.000448	0.0107
Tmem67	12.2983	8.06382	8.24118	20.9588	6.08034	6.81123	6.97947	4.40318	4.4548	0.979083	3.08119	0.000451	0.0108
Lct	12.101	7.25066	8.88271	10.9445	5.20168	3.91392	4.54324	1.40321	0.781037	1.569	2.59459	0.000452	0.0108
Kdm3a	21.4069	26.0888	27.3884	46.569	20.9122	13.7241	19.0618	11.9031	9.05424	0.912192	4.41211	0.00046	0.0109
Lamtor2	74.1185	52.0082	53.5924	68.8411	73.3859	138.665	71.8687	105.628	117.242	-0.792332	6.39938	0.000461	0.0109
Mll3	71.3892	48.2474	59.0207	115.903	43.4059	61.7586	26.0084	25.5965	26.1213	0.915673	5.6784	0.000461	0.0109
Nav1	86.9757	66.2724	75.0589	116.559	56.375	72.3312	51.1279	40.0157	37.6633	0.656169	6.03386	0.000461	0.0109
Pkd2	35.3164	22.599	24.2301	67.0352	21.5799	20.942	17.6462	15.5805	17.0671	0.863904	4.6992	0.000462	0.0109
Sphkap	135.939	151.79	344.847	171.501	128.601	121.484	56.4942	38.177	40.4693	1.36858	7.03393	0.000461	0.0109
Hps5	9.37168	6.8102	6.71138	18.4963	5.23683	6.45542	3.32512	4.16124	2.37204	1.14838	2.75386	0.000466	0.011
Kcnt2	12.9559	7.28454	9.82033	16.4168	4.0067	10.166	3.2922	2.80642	3.09522	1.25125	2.91432	0.00047	0.0111
Lrp1	103.45	93.6148	130.329	277.389	99.4997	83.9713	69.5971	61.0638	59.5324	0.881372	6.71042	0.000471	0.0111
Adamts4	13.9424	14.0947	15.0513	19.4265	10.6845	8.89527	9.51446	5.99993	4.16553	0.913809	3.48097	0.000479	0.0112
Appl2	59.1567	44.2494	42.4396	137.518	37.3959	36.9027	35.5887	34.8867	24.4725	0.91411	5.59123	0.000478	0.0112
Csmd3	31.4362	17.2457	12.6332	51.8771	9.31382	21.7553	6.15642	5.66123	7.28968	1.39096	4.10453	0.00048	0.0112
Gdpd2	4.76805	2.33783	2.71416	21.0682	2.10879	3.10064	1.54733	0.919344	1.12816	1.93834	2.01662	0.000477	0.0112
Neurod6	116.176	79.6556	97.2657	140.692	69.9767	87.4786	60.807	34.6932	42.6967	0.796809	6.30792	0.000479	0.0112
Atp11a	33.4092	22.599	22.947	61.3988	23.9699	20.0779	15.21	13.6934	11.2238	0.933295	4.588	0.000481	0.0112
Actn3	2.36758	2.54112	2.71416	0.766117	0.948955	0.254151	0.65844	0.725798	0.376055	1.77825	0.443494	0.000482	0.0112
Dok6	8.9442	7.82665	7.10617	22.1079	6.78327	4.82886	5.10291	3.33867	3.52913	1.13509	2.89778	0.000485	0.0113
Ninl	11.246	8.06382	10.1658	14.2279	7.27532	7.16704	5.03707	3.77415	4.42588	0.89209	2.96982	0.000485	0.0113
Myo1e	19.1051	11.8247	14.8045	39.8928	13.8126	8.03116	9.81076	6.96766	4.51266	1.17059	3.77963	0.000487	0.0113
Plekhg5	80.4978	60.1059	69.2852	97.4063	59.6787	52.1517	48.3954	34.4028	31.1547	0.680137	5.86392	0.000488	0.0113
1110037F02Rik	29.3317	23.5477	29.6584	32.9978	20.2092	12.0976	20.4446	13.2579	11.3684	0.808551	4.4126	0.00049	0.0113
Dtx4	19.8614	17.449	18.407	29.6597	14.8318	11.9959	12.2799	5.22575	6.19044	0.987574	3.88548	0.000494	0.0113
Epha4	106.475	92.5306	115.426	129.364	74.862	88.8002	69.7947	40.3544	48.3664	0.714447	6.38961	0.000492	0.0113
Ildr2	35.711	33.9494	38.7385	66.1597	32.3348	27.9566	23.5392	14.6127	14.8397	0.845915	4.96066	0.000494	0.0113
Polr2f	40.9065	30.5951	29.8558	30.973	41.754	76.2452	41.0208	50.9027	64.2764	-0.799464	5.51058	0.000492	0.0113
Pxn	25.3857	14.5352	15.298	83.3973	12.6879	17.2822	9.90952	11.4676	7.17397	1.39029	4.34866	0.000494	0.0113
Rnf43	1.87434	0.914803	1.28306	3.55697	0.808369	0.864112	0.592596	0.435479	0.376055	1.49495	0.263559	0.000493	0.0113
Ank3	379.734	324.213	486.378	551.276	291.435	296.34	82.3709	79.983	121.871	1.26346	8.14205	0.000496	0.0113
Cstb	45.4773	39.8109	36.4685	33.2714	45.6904	89.2577	49.5476	67.8863	77.8723	-0.834722	5.77043	0.000497	0.0113
Commd6	47.812	37.1003	35.8269	45.2009	51.4896	78.685	47.9015	65.0799	70.1487	-0.681099	5.74449	0.000501	0.0114
Kcnh3	36.6975	29.8836	35.7282	53.4093	30.1557	19.1121	16.5598	6.91928	8.50462	1.17833	4.68047	0.0005	0.0114
B630019K06Rik	77.0451	76.0981	66.571	54.8321	100.695	108.878	94.2886	118.837	127.251	-0.751192	6.54271	0.000505	0.0114
Myo18b	4.01174	3.45592	4.88549	1.75112	1.89791	1.32158	0.888894	0.193546	0.665328	1.81011	1.13913	0.000505	0.0114
Sema6d	31.0745	31.2049	33.705	74.8058	26.3247	22.5177	26.3047	14.9031	11.9759	0.940523	4.87121	0.000505	0.0114
Zfyve16	18.3159	10.3678	9.1788	21.2324	6.39666	10.5218	7.37453	4.6935	6.16151	0.970504	3.35588	0.000506	0.0114
2900053A13Rik	20.1573	13.6543	12.8306	16.9093	20.3147	46.5604	17.4157	31.1126	31.9357	-0.964469	4.55834	0.000513	0.0116
Mrpl54	40.775	30.7645	30.4973	26.8141	41.1214	74.4153	39.6052	58.3058	66.3592	-0.86201	5.52389	0.000513	0.0116
Gm15869	0.887843	0.64375	0.542832	2.24363	0.246025	0.457471	0.296298	0.290319	0.0867819	1.84369	-0.594023	0.000515	0.0116
2310016M24Rik	170.203	120.89	114.735	122.415	160.971	330.548	155.491	246.771	293.728	-0.921077	7.58948	0.000518	0.0116
A030009H04Rik	237.942	184.993	157.569	176.973	260.049	381.327	218.602	340.109	389.795	-0.828106	8.04419	0.000519	0.0116
Ypel1	12.6271	10.6388	11.5969	22.3816	8.68118	10.5218	5.16876	3.87092	4.65729	1.02697	3.28248	0.000521	0.0117
4921534H16Rik	0.493246	0.677632	0.493484	7.93478	0.246025	0.660791	0.065844	0.0483866	0.202491	3.06291	0.129034	0.000524	0.0117
Cela1	15.8496	14.6368	14.8539	13.024	17.5732	33.4462	17.6133	33.7738	29.7951	-0.927275	4.42775	0.000524	0.0117
1110058L19Rik	50.2453	45.3674	41.2553	42.3006	53.6335	92.0533	53.7946	75.5314	88.4307	-0.774635	5.93105	0.000525	0.0117
Pkd1	60.5049	35.5418	47.2758	138.339	41.0862	41.4774	29.4652	23.2255	19.902	1.04383	5.53011	0.00053	0.0118
Gpd1	32.8831	30.4934	36.0737	57.1304	24.9189	24.6018	26.1072	12.6289	17.8192	0.778039	4.837	0.000532	0.0118
Usp37	47.1872	26.1566	31.583	57.8966	26.0787	26.9908	20.7079	21.9191	20.1912	0.703103	4.92367	0.000535	0.0119
Lgi4	2.86083	3.76086	3.84918	17.1282	2.81172	1.88071	2.40331	1.40321	0.983528	1.66965	1.95289	0.000536	0.0119
Zdbf2	48.3052	24.8352	37.258	22.8193	13.4611	28.5665	9.74491	5.95155	8.38891	1.33036	4.45671	0.000536	0.0119
Gm16836	15.192	13.8576	11.054	11.9295	18.5222	29.5831	16.7573	20.0804	22.274	-0.783005	4.16029	0.000538	0.0119
Ndufa1	147.119	109.539	95.045	89.4168	138.02	273.873	142.289	201.482	242.092	-0.920455	7.33835	0.000542	0.012
Btaf1	24.1691	16.5003	17.4693	37.485	11.7389	19.7729	11.2593	9.53215	7.75251	0.897043	4.06682	0.000546	0.012
C230004F18Rik	19.3024	12.9428	9.52424	23.3666	8.82177	12.5042	6.02473	5.95155	5.95902	0.961844	3.49974	0.000545	0.012
Dgkz	317.881	245.608	299.989	419.066	250.208	179.735	198.75	128.902	100.493	0.813494	7.86464	0.000546	0.012
Phlda3	69.3175	55.0915	52.9015	55.2699	70.7499	110.911	69.8276	104.708	113.858	-0.774388	6.30519	0.000549	0.012
Glrx5	137.747	108.048	99.8318	116.559	135.56	250.694	139.491	193.304	232.084	-0.800905	7.30791	0.000551	0.012
Spata1	2.89371	1.01645	1.87524	4.48726	0.843516	1.57573	0.526752	0.387092	0.549619	1.62382	0.642136	0.00055	0.012
Nbas	21.6699	23.1072	27.9805	29.3313	19.6469	15.1474	15.3746	9.82247	10.8767	0.769924	4.25273	0.000551	0.012
Cmya5	3.55137	2.9477	2.36872	8.86507	2.07364	2.13486	0.65844	0.967731	0.376055	1.72192	1.35618	0.000556	0.0121
Nop16	39.361	33.4072	31.3362	33.7639	42.949	66.6891	40.0332	58.0155	65.8096	-0.746665	5.5314	0.000559	0.0121
Pdzrn3	4.70228	3.11711	4.34266	7.05922	2.4954	1.82988	2.27162	1.30644	2.25633	1.10539	1.70604	0.000558	0.0121
Pole4	67.5418	58.073	52.8521	65.0652	77.9198	125.449	67.5889	90.2409	101.419	-0.682801	6.30067	0.000558	0.0121
Carhsp1	20.1573	18.0928	22.9964	43.0667	15.0076	19.3663	13.1688	8.66119	8.67819	0.902381	4.18583	0.000564	0.0121
Fibcd1	30.7457	41.6744	43.1799	43.8876	28.6795	20.2304	26.7656	11.4676	13.3644	0.91729	4.8397	0.000563	0.0121
Mertk	13.0546	10.0628	11.4982	39.072	10.79	8.99693	5.8272	4.93543	4.62837	1.2366	3.51996	0.000564	0.0121
Mrpl18	85.2329	70.0332	63.314	67.2541	92.5056	142.477	82.2392	118.789	132.834	-0.746687	6.58419	0.000564	0.0121
Ophn1	31.7979	25.2418	30.7934	55.434	20.1038	26.0758	20.8067	19.7417	17.501	0.667074	4.74843	0.000564	0.0121
Plp1	377.07	372.426	486.477	759.933	226.625	420.924	277.006	151.305	154.819	0.935541	8.43798	0.000561	0.0121
Tmem93	89.2776	70.0671	66.9164	71.9603	95.9148	145.018	86.1569	122.079	134.396	-0.724279	6.62815	0.000565	0.0122
Fat3	17.0006	9.48685	10.4619	27.6897	7.38076	11.1826	6.2881	2.66126	3.87626	1.26242	3.35581	0.000572	0.0123
Gm17494	15.9154	0.169408	0.394787	0.164168	0.175732	0.508301	0.16461	0.193546	0.260346	3.96652	1.08421	0.000576	0.0123
Rrp36	25.1556	22.7684	18.555	22.491	30.2963	38.6309	26.6339	35.2738	40.2957	-0.705906	4.87106	0.000576	0.0123
Cit	254.778	252.147	233.221	195.962	342.995	381.937	309.138	394.012	452.77	-0.758588	8.31367	0.000579	0.0123
Fam120c	17.0006	20.1595	24.3288	23.5307	14.5858	7.31953	14.5186	7.64507	7.2029	0.965566	3.91526	0.00058	0.0123
Gm11627	1.34821	0.440461	0.93762	0.875562	0.527197	0.20332	0.065844	0.0967731	0.144636	2.01254	-0.775292	0.000579	0.0123
Plk1	1.01938	0.440461	0.592181	1.36807	0.210879	0.20332	0.32922	0.241933	0.260346	1.60151	-0.791964	0.000579	0.0123
Mmd	104.93	99.7813	118.288	170.735	81.083	90.8334	78.8153	48.822	67.6609	0.650992	6.55333	0.000588	0.0125
Cpne6	442.212	345.931	380.328	1018.39	304.193	322.263	282.701	245.755	234.051	0.83373	8.57814	0.000589	0.0125
Stim2	71.3892	66.2046	73.7759	118.967	59.8545	52.8125	56.3954	38.6125	38.9072	0.637698	5.97433	0.00059	0.0125
Mea1	95.2952	72.3033	69.5812	72.1244	97.0746	160.725	92.2145	126.87	144.752	-0.759301	6.70667	0.000592	0.0125
AI316807	51.758	46.2484	44.5123	41.2061	58.6946	80.3116	58.5024	74.1282	90.9763	-0.737116	5.94596	0.000594	0.0125
Oaz1	182.896	135.764	135.461	158.805	179.915	321.907	184.297	257.271	300.121	-0.783225	7.70056	0.000597	0.0126
Dixdc1	41.334	34.5592	40.8605	63.6972	29.031	35.5811	28.28	18.2901	19.0342	0.700393	5.07765	0.000598	0.0126
Txndc17	35.7768	29.9852	29.0169	23.2571	39.2938	68.6715	36.6751	50.5639	56.495	-0.827324	5.37844	0.000599	0.0126
Chchd1	35.5137	27.1392	26.8949	25.1724	36.4469	66.2825	32.8232	54.5316	56.2925	-0.847968	5.34346	0.000608	0.0128
D16Ertd472e	5.72166	3.3204	4.83614	11.9295	2.56569	3.81226	2.76545	1.83869	1.96706	1.1849	2.06251	0.000608	0.0128
Llgl1	34.9876	35.0674	45.4005	61.563	34.3381	20.942	27.3582	19.8869	15.1	0.810432	5.00744	0.000609	0.0128
Fyco1	43.1097	18.7365	24.9703	56.5285	19.4009	26.7875	11.9507	8.70958	8.30213	1.16503	4.54319	0.000611	0.0128
Tub	115.025	98.0872	100.671	138.339	88.78	64.2493	78.8482	45.4834	43.6224	0.729362	6.40327	0.000613	0.0128
Lsm4	60.9652	47.6714	47.6212	51.2204	59.503	114.063	62.9798	84.241	104.688	-0.79266	6.15016	0.000615	0.0128
2410022L05Rik	94.0456	68.7796	63.7088	67.5277	94.298	157.167	84.8729	129.676	155.368	-0.834988	6.68595	0.000621	0.0129
Lrrcc1	50.0152	20.1257	28.1286	24.1874	15.0427	24.0426	10.4034	11.9515	11.0792	1.03873	4.42671	0.000621	0.0129
Nenf	40.8079	29.5109	33.2115	28.7294	41.6134	77.9734	42.3377	51.5317	61.0366	-0.79298	5.51155	0.000622	0.0129
1500011K16Rik	36.0727	27.3424	28.1286	27.3613	36.4821	69.7389	34.8973	51.3381	57.0735	-0.815684	5.36953	0.000623	0.0129
1810046J19Rik	68.89	48.4846	52.8028	53.081	68.2896	125.805	64.7905	94.7893	110.82	-0.80944	6.26967	0.000627	0.0129
BC003266	91.7767	76.4707	74.2693	65.3936	97.8478	156.963	94.5849	130.74	155.253	-0.793256	6.73127	0.000626	0.0129
Fancm	15.0604	10.1306	11.1527	14.1732	8.50545	8.13282	6.5844	5.95155	5.7276	0.774652	3.23921	0.000626	0.0129
Frmd4a	43.603	46.7905	41.8474	90.4565	38.0285	35.5302	32.5269	24.3868	17.3853	0.802023	5.31986	0.000624	0.0129
Vcan	8.25365	5.75987	8.38923	11.9843	4.11214	6.70957	2.07409	1.83869	1.35958	1.36593	2.4499	0.000627	0.0129
Evc	6.47797	2.37171	4.5894	18.551	3.33892	3.10064	2.00824	2.08062	1.64886	1.5389	2.21029	0.000637	0.0131
Sipa1l3	59.8801	58.6152	64.8438	52.8621	45.7959	27.0416	39.7698	20.5159	22.3608	0.862464	5.44141	0.000638	0.0131
Uqcrh	261.684	194.65	171.782	166.959	242.265	506.522	246.816	373.689	454.882	-0.94405	8.20226	0.000639	0.0131
Fam162a	55.7039	44.9948	45.4005	39.6192	55.3206	105.676	57.6794	82.0636	86.8397	-0.802868	6.00894	0.000645	0.0132
Gtf2a2	47.2201	39.8109	36.4191	37.1019	51.5599	84.5305	47.8357	63.5315	62.5987	-0.69233	5.71857	0.000644	0.0132
Prlr	2.30182	2.54112	2.51677	3.28336	0.808369	2.18569	0.82305	0.580639	0.809964	1.30348	0.835966	0.000645	0.0132
Grm2	12.0352	7.11513	10.3138	18.7151	7.73223	4.37139	6.18934	2.03224	2.63238	1.27683	2.94571	0.000647	0.0132
Aass	2.23605	2.77829	2.36872	8.97451	2.07364	0.813282	0.888894	0.822571	1.38851	1.56888	1.26975	0.000651	0.0133
Cdh10	21.0123	21.9553	17.8641	40.7684	14.2695	16.3673	16.0659	12.6773	10.8477	0.7352	4.21995	0.000654	0.0133
Clic6	0.986492	0.982566	2.12198	3.00975	0.210879	0.762452	0.757206	0.0483866	0.144636	2.10056	0.0212286	0.000655	0.0133
Col6a2	5.78742	4.74342	4.83614	31.3013	2.74143	3.91392	3.2922	2.37094	3.8184	1.62647	2.69301	0.000654	0.0133
Slc1a3	131.894	145.081	186.784	1070.32	147.369	103.439	102.486	103.257	81.6907	1.60748	7.71639	0.000655	0.0133
Dmd	141.595	112.758	148.933	255.992	130.64	78.99	31.4734	28.4513	27.6834	1.38592	6.67425	0.000657	0.0133
Dnajc30	34.0011	30.0191	27.3884	30.4258	36.5524	53.3208	38.0249	50.3704	52.503	-0.681797	5.30865	0.000656	0.0133
D630037F22Rik	8.45095	8.13158	8.63597	18.2774	5.09624	7.82784	5.36629	3.04835	3.23986	1.0401	2.87547	0.00066	0.0133
Sema3d	2.26893	2.40559	2.61547	3.55697	1.30042	1.98237	0.691362	0.774185	0.520691	1.31264	0.851907	0.000661	0.0133
Setd2	69.9752	53.9734	67.3606	73.5472	54.0904	46.2554	24.4611	19.0643	18.5424	0.972977	5.54301	0.000661	0.0133
Abcc5	126.896	100.018	100.967	229.726	85.2302	91.5958	82.7001	76.7895	64.855	0.671115	6.69443	0.000666	0.0133
Atp8a1	87.8965	115.909	128.108	169.75	86.7064	72.7379	89.9429	60.7251	52.1848	0.695348	6.56206	0.00067	0.0133
Bmp1	42.7151	16.9747	21.1211	114.918	18.944	26.4317	13.7943	11.8547	8.04179	1.46962	4.82308	0.000668	0.0133
Ndufa2	141.43	102.932	105.606	97.2968	128.566	271.534	137.318	213.627	256.932	-0.922212	7.35595	0.000668	0.0133
Pdlim5	9.40456	8.87698	10.4125	29.2766	7.06444	8.64112	6.02473	4.40318	4.4548	1.10185	3.23427	0.000668	0.0133
Radil	9.50321	8.06382	8.43858	17.4565	6.74813	4.26973	6.05765	4.88704	4.04982	0.929194	2.92204	0.000668	0.0133
Specc1l	34.8232	42.2165	47.8679	60.1949	35.0059	23.4835	30.9796	21.3385	16.315	0.771877	5.09638	0.000668	0.0133
Srcap	22.9195	16.026	19.2952	25.8838	16.1322	13.3683	11.391	7.74185	7.11611	0.835439	3.93668	0.000666	0.0133
Ttc14	231.168	103.847	98.6475	268.469	92.0487	130.328	63.1444	69.096	70.1487	0.939783	6.91805	0.000669	0.0133
Hcfc1	63.5959	49.9076	63.6101	86.6807	48.9942	52.05	35.029	31.1609	34.1342	0.62223	5.66711	0.000672	0.0133
Tnxb	4.63651	2.30395	2.76351	9.30285	1.89791	2.74483	1.18519	1.16128	1.35958	1.37272	1.55741	0.000672	0.0133
Ralgps2	28.6412	23.6494	20.677	40.1117	18.4871	22.0603	15.2758	12.4837	13.3644	0.693581	4.40572	0.000679	0.0134
Sik2	25.4844	24.0559	20.677	32.4505	18.4519	14.9441	17.6791	12.9192	10.4138	0.692875	4.28122	0.000678	0.0134
Mkks	77.9987	71.2869	68.2982	54.6132	84.5273	141.765	89.5808	116.176	118.255	-0.753035	6.53108	0.00068	0.0134
Rgma	5.85319	5.96316	7.20487	22.8193	5.23683	2.84649	4.57616	3.14513	2.8638	1.30379	2.68346	0.000681	0.0135
Amigo2	30.4168	24.5303	29.1156	31.6844	19.1548	19.3663	21.0042	13.645	14.3769	0.644934	4.48893	0.000686	0.0135
Rab31	30.384	31.7132	36.8633	105.341	29.1716	23.5343	25.8109	18.8224	16.5464	1.00723	5.07691	0.000685	0.0135
Crim1	25.024	21.447	29.5597	54.6679	21.0527	22.1619	15.2758	8.56442	9.89313	0.981319	4.47731	0.000688	0.0135
Smarca4	200.653	190.482	228.286	192.186	162.623	93.9849	130.536	97.5473	90.6871	0.74685	7.26488	0.000688	0.0135
Zfp428	49.9494	41.6405	40.9592	35.4055	50.8921	82.2431	55.0785	70.6928	87.5629	-0.795138	5.85981	0.00069	0.0135
AC163349.1	0.690545	0.169408	0.197394	1.36807	0.105439	0.20332	0	0	0	3.16829	-1.51383	0.000692	0.0136
4930402H24Rik	68.5612	68.8813	69.6306	156.78	58.308	59.827	51.1279	46.2092	37.8369	0.718555	6.05427	0.000694	0.0136
Sgcd	1.7428	3.01546	1.97394	5.36282	1.40586	0.864112	1.31688	0.967731	1.01246	1.2826	0.97583	0.000694	0.0136
6720401G13Rik	6.87256	2.575	2.51677	16.3621	1.79247	3.81226	1.77779	1.16128	1.15709	1.71581	1.9871	0.000696	0.0136
Ccdc124	135.544	104.965	102.595	116.121	140.832	228.532	134.914	178.885	209.781	-0.718347	7.24272	0.000697	0.0136
Hsbp1	486.9	390.824	370.212	387.765	539.815	860.909	487.707	635.267	751.762	-0.753102	9.10347	0.000697	0.0136
Neb	6.87256	5.25165	7.35291	5.41754	3.0226	4.67637	1.3498	0.822571	1.18602	1.48372	1.99823	0.000701	0.0136
Atox1	75.9599	57.9375	63.166	54.066	73.1047	139.376	78.9141	112.934	119.961	-0.806462	6.44548	0.000711	0.0138
Fkbp1b	67.1801	53.3974	52.5067	44.4348	74.7214	100.44	67.3584	92.6119	99.1628	-0.743436	6.19876	0.00071	0.0138
Utrn	73.7896	66.3063	81.3755	146.438	70.539	62.2669	27.0619	32.9512	28.1752	0.959979	5.98265	0.000711	0.0138
Zrsr2	74.9405	67.0517	55.9117	59.2099	81.3641	118.993	78.5848	103.015	125.024	-0.735903	6.42632	0.000711	0.0138
Dnajc15	74.2171	68.678	61.3401	51.2204	80.2394	130.481	78.091	123.192	131.07	-0.833464	6.49415	0.000716	0.0138
Pde7a	24.9583	13.5526	13.7682	26.6499	12.723	13.6733	9.28401	7.01605	8.27321	0.858291	3.82245	0.000719	0.0139
Maml2	12.66	7.75888	10.0177	43.3403	9.70043	7.9295	4.83954	4.59672	3.182	1.44053	3.43336	0.000721	0.0139
Uqcr10	252.608	181.267	181.602	155.467	243.811	462.3	235.03	370.254	407.152	-0.898903	8.12945	0.000726	0.014
2310045N01Rik	32.3569	20.8372	21.96	18.4963	32.5105	52.355	30.4199	39.5802	45.9076	-0.83999	5.05145	0.00073	0.014
AC188461.4	10.9829	12.2313	8.83336	7.55172	16.4486	17.7397	13.07	19.2578	22.7947	-0.920507	3.87729	0.000732	0.014
Plxna3	9.1415	6.47138	9.32685	26.6499	6.08034	7.2687	4.83954	2.08062	2.80595	1.34692	2.97734	0.000732	0.014
Lsm1	47.7791	37.3714	34.8893	38.5795	48.2913	77.6684	45.4982	70.1121	71.9422	-0.740096	5.72843	0.000736	0.0141
Znhit1	55.2107	45.7401	43.5746	49.6334	56.1992	100.542	56.3625	77.8056	89.0382	-0.726426	6.00714	0.000736	0.0141
Gpam	23.7087	26.0888	31.1882	118.31	26.395	15.249	17.3828	18.532	9.71957	1.32784	4.89939	0.000738	0.0141
Zmynd11	181.416	176.15	182.638	263.873	155.031	134.852	130.009	115.16	101.622	0.562456	7.30161	0.000739	0.0141
Ap4s1	47.9435	43.4362	40.7618	42.9025	52.544	83.1072	51.918	69.4347	69.7437	-0.652434	5.81293	0.000742	0.0141
Ercc5	25.1227	18.0928	20.825	24.6252	16.5189	15.5032	12.8396	10.1612	9.57493	0.704272	4.07745	0.000744	0.0141
Gm13629	31.4362	26.1227	21.9107	22.8193	38.9775	44.3747	29.8273	42.4834	44.2588	-0.718276	5.08892	0.000744	0.0141
Lsm6	49.8179	38.5911	40.3176	46.1859	52.7549	85.6487	50.4036	66.8218	70.3222	-0.655752	5.80679	0.000743	0.0141
Uggt2	27.293	14.8401	15.7421	46.8426	13.2151	19.5188	8.55972	8.9999	7.98393	1.05186	4.11637	0.000745	0.0141
Eml5	64.4508	29.748	25.8586	89.7451	22.4938	41.3757	12.8067	11.1289	13.6248	1.27341	5.04006	0.000747	0.0141
Gm15624	5.49147	2.64276	2.31937	6.45727	1.9682	2.38901	1.3498	1.49998	1.30173	1.2063	1.48603	0.000748	0.0141
Atp5j2	290.752	206.169	203.809	175.495	277.165	549.626	269.17	410.076	472.556	-0.915853	8.3261	0.000749	0.0141
Pcbd1	20.1244	16.602	18.9498	10.9445	23.2318	36.9027	22.9137	34.9351	33.7292	-0.916329	4.62895	0.000753	0.0142
Cxx1a	47.9106	40.6918	37.4061	35.3508	45.2335	76.1943	55.3748	71.1766	75.2977	-0.754269	5.77137	0.000755	0.0142
Hsbp1l1	6.0176	3.99803	4.14527	2.68141	6.60754	10.0135	7.34161	8.75797	10.3849	-1.08715	2.78044	0.000758	0.0143
Atpif1	382.858	291.449	288.392	259.276	378.703	696.423	383.344	534.768	629.111	-0.847365	8.75521	0.000761	0.0143
Cox7c	173.064	133.561	119.522	95.9835	160.971	325.923	172.775	247.594	287.335	-0.930604	7.59537	0.000765	0.0144
Mrps24	51.9553	41.9115	40.515	42.9573	52.4034	88.5969	52.1485	74.2734	76.2523	-0.707761	5.86831	0.00077	0.0144
Kdm2a	52.58	46.8582	50.4341	83.1237	41.5432	38.8342	38.848	32.8545	29.4769	0.574156	5.50051	0.000771	0.0144
Snrnp25	28.115	20.9388	21.96	20.9588	27.4143	54.2357	27.7203	39.435	46.9201	-0.837142	5.01531	0.000777	0.0145
Bmyc	65.2729	47.3665	45.894	57.0757	65.021	96.5264	63.737	88.7893	97.0511	-0.69903	6.13533	0.000778	0.0145
Ccnl1	63.7274	27.3763	28.326	87.009	25.8678	37.0551	18.7985	19.9353	17.8192	0.993959	5.12058	0.00078	0.0145
Baiap2	91.8753	59.3605	75.3057	117.599	51.5248	75.2286	44.6752	29.3706	37.8369	0.766314	5.98098	0.000781	0.0146
Zfp318	344.648	162.462	250.838	97.8988	136.263	126.821	67.9839	54.1929	51.8666	1.28412	7.16851	0.000783	0.0146
Aspa	18.4145	9.79178	13.6695	22.9288	7.52135	13.8766	3.48973	3.82254	3.67377	1.26329	3.38514	0.000787	0.0146
Cox7b	445.763	371.817	336.605	230.711	468.011	856.487	463.838	699.186	719.711	-0.940285	9.01571	0.000787	0.0146
5730494N06Rik	43.307	42.623	36.0737	35.2414	51.6302	63.1818	50.4694	63.2896	71.4793	-0.688041	5.68914	0.000793	0.0147
Cyp4f15	5.29418	3.25263	4.14527	29.5502	3.44436	3.65977	2.2387	1.69353	2.37204	1.75723	2.50317	0.000791	0.0147
Fbn2	3.28831	1.21974	1.97394	4.5967	1.05439	1.77905	0.526752	0.387092	0.578546	1.58812	0.764439	0.000793	0.0147
Pcsk6	7.89194	9.35132	10.2151	23.8043	6.92386	4.52388	5.95888	6.38702	2.66131	1.13442	3.06202	0.000794	0.0147
Fkbp5	33.4092	36.6938	33.9517	42.1912	25.1649	24.4493	26.1072	19.403	21.1748	0.56459	4.85812	0.000796	0.0147
Klhl2	167.802	150.434	169.709	199.738	126.352	139.122	109.564	75.1443	80.4179	0.623593	7.06085	0.000796	0.0147
Ar	18.4474	15.2467	18.703	27.416	13.8126	12.555	11.9178	9.67731	10.4428	0.666343	3.92226	0.000798	0.0147
Fry	55.7697	41.6744	51.273	102.222	38.0988	52.8125	23.3417	19.7901	21.6376	0.914682	5.44425	0.0008	0.0147
Smoc2	16.5731	11.452	13.5215	21.8343	10.4385	9.30191	9.51446	4.45156	6.42186	0.880376	3.49945	0.000801	0.0147
Ubr1	38.3417	38.1168	37.5541	56.9115	31.7724	29.8881	26.173	24.3384	24.0097	0.54986	5.07398	0.0008	0.0147
Pvalb	697.22	526.52	503.995	376.163	669.962	1225.11	712.992	1044.76	1268.26	-0.96747	9.63341	0.000804	0.0147
Repin1	84.5095	52.2793	62.9686	67.6919	46.5691	34.9203	45.3007	37.4512	35.8988	0.654212	5.69441	0.000807	0.0148
Dock8	6.6095	5.15	4.93484	9.57646	4.42846	3.65977	1.11935	1.25805	1.41744	1.3849	2.05586	0.000815	0.0149
Ier3ip1	106.41	85.0089	74.5654	88.0487	106.318	185.479	102.717	141.579	167.084	-0.747321	6.88806	0.000823	0.015
Evc2	13.0875	11.5875	14.2123	19.1529	10.8251	8.28531	7.14408	3.48383	3.93411	1.02624	3.32403	0.000825	0.015
Npr3	7.79329	7.42007	8.14249	9.13868	3.58494	5.69297	5.33337	3.38706	3.03737	0.877758	2.56962	0.000826	0.015
Wdfy3	171.091	183.232	204.796	265.897	168.633	112.894	135.441	87.4829	88.7489	0.705485	7.27849	0.000827	0.015
Zfp871	32.7515	32.4586	37.5541	80.9348	28.9607	19.3663	26.5681	21.6772	21.8401	0.808589	5.02882	0.000827	0.015
Fgfr1	58.5648	60.2753	64.0542	135.329	51.349	46.0521	51.2925	39.2415	31.9936	0.727194	5.85988	0.00083	0.015
Ccdc18	1.97298	1.38915	1.82589	3.72114	1.08954	1.06743	0.362142	0.387092	0.867819	1.4253	0.512317	0.000834	0.0151
2310030G06Rik	3.05813	2.81217	1.97394	3.22864	4.04185	7.21787	4.54324	5.61284	4.36802	-0.96849	2.0615	0.000842	0.0152
BC031353	34.9218	40.1497	39.9722	46.952	31.9833	20.1287	28.1812	15.3385	15.9968	0.775572	4.91327	0.000844	0.0152
Cby1	57.9729	50.5513	47.5225	50.6184	63.58	84.073	65.8769	77.0314	81.6907	-0.606937	6.02177	0.000844	0.0152
2700089E24Rik	187.006	169.137	158.31	179.654	225.851	294.052	202.964	259.497	269.313	-0.610438	7.76627	0.000846	0.0152
Ccdc72	42.4192	29.5109	27.5858	41.8081	43.1599	88.3427	38.2554	57.0961	62.3962	-0.795932	5.58145	0.000847	0.0152
Gda	17.428	16.7375	21.0718	29.3861	12.231	14.7916	12.1811	4.40318	7.46324	0.966037	3.88303	0.000849	0.0153
B930095G15Rik	16.7375	15.2467	13.2254	87.994	13.3205	14.8424	7.44037	8.75797	7.60788	1.48267	4.24341	0.000855	0.0153
Edc4	50.8372	62.0372	66.1762	119.678	49.6971	29.0748	51.0291	34.6932	24.5303	0.857471	5.72427	0.000854	0.0153
Myo9b	26.7997	12.4345	14.5578	58.006	10.6845	19.7729	8.06589	7.88701	6.39293	1.272	4.10643	0.000864	0.0155
Ndufa6	228.143	164.732	169.216	120.007	226.027	394.543	226.931	315.625	369.257	-0.903652	7.96477	0.000865	0.0155
Dnajc12	33.6723	30.8322	28.474	25.2271	39.4344	57.133	34.5352	49.6446	60.863	-0.781192	5.34429	0.000868	0.0155
Higd1a	188.519	160.158	150.266	153.059	201.776	294.205	201.944	262.158	277.268	-0.678626	7.72824	0.000867	0.0155
Inpp5d	7.99059	5.8954	6.41529	10.3426	4.67448	5.38799	1.54733	1.54837	1.61993	1.31318	2.30654	0.000868	0.0155
Timm22	64.3851	57.4971	56.4546	55.5982	67.9733	101.965	74.305	93.9183	108.159	-0.690686	6.25867	0.000869	0.0155
Srp9	116.505	90.701	92.5776	104.192	123.68	199.915	116.873	147.869	180.738	-0.687916	7.03629	0.000871	0.0155
1110028C15Rik	19.138	14.2641	11.893	24.3516	11.1414	12.6059	9.15232	8.37087	7.14504	0.749988	3.68644	0.000872	0.0155
Nedd8	171.485	131.833	129.194	128.927	163.994	310.369	170.734	236.562	281.781	-0.802644	7.59718	0.000875	0.0155
Ptpdc1	21.6042	20.3628	21.0718	31.0277	16.5189	14.9949	15.9013	12.7257	10.7899	0.631394	4.17888	0.000874	0.0155
Gm606	0.789194	0.609869	0.542832	1.64168	0.316318	0.304981	0.263376	0.387092	0.115709	1.56682	-0.740699	0.000877	0.0155
2310075C17Rik	0.328831	0.304934	0.0986968	1.03973	0.0351465	0.20332	0.032922	0	0	2.92097	-1.83413	0.000881	0.0156
Mrpl11	56.6247	50.5852	46.0914	42.2459	58.9758	98.9662	61.3995	77.7572	90.5424	-0.732909	6.03523	0.000881	0.0156
1810037I17Rik	51.2647	37.778	37.8502	48.7579	50.3649	105.981	46.3542	76.1604	90.3978	-0.835897	5.92915	0.00089	0.0156
Gm10221	0.493246	0.304934	0.246742	0.164168	0.527197	1.47407	0.757206	0.870958	0.925673	-1.56611	-0.46271	0.000888	0.0156
Gm6483	10.1609	5.62434	7.15552	11.6559	5.41256	5.33716	4.11525	2.99997	3.44235	0.923748	2.61804	0.00089	0.0156
Itsn2	39.2953	24.903	35.3828	59.1552	29.5582	26.4825	18.1071	11.3225	11.4841	0.941304	4.78543	0.000886	0.0156
Ost4	28.2137	21.5826	20.5289	21.2324	28.7498	51.6942	26.7656	37.1125	43.4488	-0.783809	4.97067	0.000886	0.0156
Pnpla7	12.2325	9.0125	10.2151	40.8231	8.78662	9.70855	5.79427	5.61284	3.93411	1.25827	3.47244	0.000888	0.0156
Gm16353	1.11802	0.271053	0.246742	0.383058	0.070293	0.20332	0.032922	0.0967731	0.0867819	2.33608	-1.48	0.000893	0.0156
Cep192	6.64238	4.6079	5.42832	10.7256	3.19833	5.03218	3.09467	1.74192	1.82242	1.10987	2.19961	0.000899	0.0157
Prokr2	1.61127	0.948685	2.46742	2.84558	0.175732	0.813282	0.921816	0.338706	0.665328	1.62396	0.298626	0.000897	0.0157
Rasd1	14.9618	11.3503	19.0485	23.6949	8.89206	12.4534	10.9301	5.46768	5.78546	0.90286	3.61707	0.000898	0.0157
Sugp2	92.8947	84.2635	82.5105	111.579	69.0277	57.3872	69.1033	54.0962	46.8333	0.554397	6.19912	0.0009	0.0157
Cpne5	4.63651	3.82862	5.03354	7.98951	2.74143	3.45645	2.27162	1.0645	2.11169	1.1023	1.86487	0.000905	0.0157
Dpy30	48.5025	38.9638	39.9722	37.3756	52.5791	82.4973	46.5188	67.3541	75.0663	-0.72426	5.7793	0.000904	0.0157
Anapc11	94.6375	69.2201	73.2824	74.4228	92.8922	155.235	90.766	132.724	148.715	-0.750362	6.7096	0.000913	0.0158
Col23a1	4.89958	3.62533	4.44136	21.3418	1.58159	4.26973	2.89714	2.41933	1.85135	1.53809	2.29727	0.000911	0.0158
Kdm4b	53.435	62.6132	62.8205	84.1087	49.6971	33.8528	46.5188	31.1609	20.5962	0.765379	5.60562	0.000911	0.0158
Ngrn	74.1513	57.9375	57.2935	51.7676	77.8846	111.572	74.6013	98.4666	104.138	-0.699942	6.31459	0.000914	0.0158
Slc7a3	2.3347	1.86349	2.07263	6.45727	1.15983	0.864112	1.08643	1.40321	1.12816	1.3114	1.01076	0.000914	0.0158
1500032L24Rik	144.258	109.065	107.382	103.152	140.551	243.68	141.894	191.901	229.741	-0.781501	7.30961	0.000915	0.0158
Fgd6	5.45859	4.09967	4.6881	16.4715	3.65524	4.01558	1.41565	2.5161	1.18602	1.44784	2.1982	0.000916	0.0158
Bloc1s2	26.9641	22.328	18.0615	25.5007	28.3281	44.7305	27.5886	36.048	39.0229	-0.684024	4.90979	0.00092	0.0158
Farp1	16.1785	15.9921	17.568	48.8126	16.4134	12.4534	10.0741	8.32249	6.71113	1.0485	4.01894	0.000922	0.0159
Npas2	6.90545	9.24967	9.42554	16.3621	7.62679	3.96475	5.20168	2.66126	2.8638	1.11682	2.80758	0.000923	0.0159
Rnf112	264.314	118.111	150.513	430.886	109.973	185.072	95.0788	90.3861	77.3226	0.99169	7.33523	0.000925	0.0159
Cdc40	28.115	23.1072	23.7366	36.8831	17.9247	20.2812	17.4487	16.7417	15.5918	0.568294	4.45504	0.000926	0.0159
Gjb6	18.1515	17.9572	19.0485	97.5705	15.2887	14.3341	11.8848	13.016	11.8023	1.31787	4.50211	0.000928	0.0159
Csmd1	31.0416	22.7007	17.4693	65.4483	16.6946	25.6692	11.7532	11.3708	10.3849	1.04575	4.49144	0.000933	0.0159
Lypd1	12.4627	13.3493	12.6825	20.9588	8.50545	10.7252	8.69141	5.08059	7.49217	0.775578	3.4509	0.000934	0.0159
Ndufa7	124.528	101.543	97.4137	93.3568	121.888	227.719	123.589	181.546	206.367	-0.795963	7.16563	0.000934	0.0159
Ptchd2	11.7393	13.451	14.4591	21.3966	9.45441	6.20127	10.2717	4.40318	2.92166	1.10206	3.36287	0.000932	0.0159
AW551984	0.986492	3.18487	3.10895	5.25337	0.738076	0.711621	1.71194	1.01612	0.6364	1.5589	0.947647	0.000941	0.016
Churc1	33.8696	26.6987	25.5625	20.4663	34.8653	65.4183	33.9426	43.1124	51.3749	-0.832757	5.23624	0.00094	0.016
Mzt1	130.085	128.818	115.475	117.325	153.625	202.812	149.861	201.336	212.847	-0.662852	7.31109	0.000941	0.016
Uqcrq	272.436	210.405	206.77	174.948	256.429	518.01	268.446	401.028	469.808	-0.889234	8.28856	0.000945	0.016
Atm	9.83204	6.74244	5.57637	16.3621	4.9908	6.55708	3.75311	2.90319	3.44235	1.03668	2.6984	0.000953	0.0161
Gm17502	1.05226	0.406579	0.29609	1.42279	0.175732	0.304981	0.230454	0.0483866	0.202491	1.87073	-0.95239	0.000953	0.0161
Gpx4	220.086	154.974	153.029	159.298	218.049	380.158	191.573	306.722	339.057	-0.815006	7.89577	0.000954	0.0161
Iscu	194.273	171.271	168.081	158.696	212.355	307.573	213.499	295.932	297.922	-0.692298	7.82655	0.000953	0.0161
Ndufv3	128.836	94.8685	96.4761	81.7556	121.326	218.671	128.1	178.256	193.408	-0.805803	7.12573	0.000955	0.0161
Nlrx1	5.45859	5.21776	4.4907	12.6957	4.04185	3.35479	3.19343	2.5161	1.9092	1.0783	2.2139	0.000958	0.0161
Scoc	177.602	162.259	143.308	115.957	197.769	290.087	195.754	257.707	274.954	-0.762272	7.6763	0.000958	0.0161
Phgdh	14.074	16.6359	17.7654	55.8718	11.1414	13.47	11.1276	11.0805	10.3849	1.02122	4.09831	0.000963	0.0162
Unc13b	17.1978	15.2128	17.3706	34.913	14.3749	14.7916	9.8766	7.01605	7.17397	0.884184	3.89322	0.000968	0.0163
Nipbl	362.339	142.032	273.143	88.979	128.179	98.8137	21.103	18.5804	21.7244	1.92979	7.00158	0.000971	0.0163
Tnks2	102.99	107.1	111.429	122.031	85.898	71.7721	81.5478	56.5155	50.7963	0.601683	6.4445	0.000972	0.0163
Ccdc90b	19.1708	17.1102	17.3706	18.934	23.8996	32.5821	21.2347	28.9352	26.3238	-0.628291	4.52556	0.000974	0.0163
Hscb	8.87843	8.19934	5.97116	8.15367	9.94646	16.7739	9.48154	15.6772	15.9968	-0.882518	3.48481	0.00098	0.0164
Bcl11b	59.4855	42.5892	53.9378	104.958	48.9591	37.6143	28.9384	13.1611	17.4721	1.0563	5.44748	0.000982	0.0164
Ndufaf2	45.28	33.9494	30.3493	29.7144	40.8402	74.9236	42.6011	66.1444	73.5332	-0.848179	5.62391	0.000983	0.0164
Kirrel3	17.0992	16.5342	20.0355	30.59	15.3942	11.1826	13.3993	7.83862	8.59141	0.792169	3.94102	0.000989	0.0165
Gm13563	2.23605	1.59243	1.13501	3.55697	0.984102	0.864112	0.82305	0.387092	0.867819	1.28592	0.49966	0.000993	0.0165
Lingo1	68.0351	76.1319	93.6139	93.7399	57.9214	46.4079	63.9016	30.8706	28.2909	0.792507	5.94151	0.000994	0.0165
Phpt1	18.0857	15.8566	13.2747	16.0885	18.6276	37.0551	17.712	28.4513	34.221	-0.862135	4.48732	0.000993	0.0165
Fgf9	67.1801	72.5066	60.7479	43.4498	85.6871	102.677	85.3997	113.563	119.528	-0.79725	6.41108	0.000996	0.0165
Myl6	119.76	90.4638	88.383	84.3823	124.173	199.661	110.98	152.998	184.556	-0.760539	7.01975	0.000996	0.0165
Cabin1	33.7709	36.6938	44.7097	56.9663	27.6954	28.7698	31.9014	16.2579	15.7364	0.752013	4.99778	0.000998	0.0165
Tceal5	68.068	55.1253	48.2134	43.6687	67.0244	99.7795	70.9469	93.2409	103.646	-0.763776	6.19591	0.001	0.0166
Romo1	63.9905	46.1128	48.8549	39.8381	57.3942	126.109	61.8605	88.9345	106.51	-0.88754	6.16858	0.00101	0.0167
Cltb	364.213	311.541	292.488	300.537	390.618	561.063	401.846	503.365	579.298	-0.699378	8.70167	0.00101	0.0167
Dzip1	56.0328	32.4924	37.8502	45.4745	33.3189	32.2263	19.5886	17.1772	16.2571	0.794282	4.99259	0.00101	0.0167
Timm13	116.538	83.4165	91.1465	95.6552	113.593	214.3	111.112	154.401	190.804	-0.775451	7.03552	0.00101	0.0167
Zfp238	145.508	127.327	145.134	222.119	112.188	127.584	91.9841	53.4671	72.6943	0.716712	6.89737	0.00102	0.0167
Acyp2	84.4437	66.7467	63.9555	42.1364	83.1917	164.181	82.1404	126.337	140.5	-0.94059	6.58947	0.00102	0.0167
Gtf2h5	110.717	88.6681	83.2014	91.2226	107.619	203.625	106.601	156.434	181.577	-0.77098	6.98456	0.00102	0.0167
Stag2	18.0528	18.3299	23.1937	35.5697	16.2377	16.0623	13.7285	11.8063	9.97992	0.705625	4.14966	0.00102	0.0167
AW549877	45.4444	49.2638	45.2031	71.5225	35.5331	31.9213	39.0784	30.8222	28.7827	0.56264	5.37293	0.00103	0.0168
Slit3	46.2336	30.1207	38.1957	47.937	22.2477	33.0396	8.59264	5.56445	5.98795	1.40068	4.68064	0.00103	0.0168
Itga7	23.61	13.5865	14.0149	46.2406	13.672	15.249	10.535	8.03217	6.16151	1.05298	4.00373	0.00103	0.0168
Mrpl51	74.6775	61.8678	58.2805	59.4288	77.4277	115.994	74.4037	106.692	112.556	-0.693116	6.3804	0.00103	0.0169
Alpk3	0.131532	0.135526	0.29609	1.25862	0.0351465	0.15249	0	0	0.0289273	3.16325	-1.89943	0.00103	0.0169
Fam174a	93.5195	80.7737	76.8355	76.8853	95.4227	154.93	100.313	129.676	154.24	-0.707561	6.75752	0.00104	0.0169
Klhl23	31.0745	32.9668	35.975	52.5885	28.3281	27.3466	24.5598	17.274	15.7943	0.659489	4.85879	0.00104	0.0169
Cirbp	152.413	157.787	143.703	146.164	179.282	293.137	184.133	215.707	260.635	-0.668431	7.60098	0.00105	0.017
Cyp26b1	2.40046	2.23618	1.87524	1.80585	0.948955	1.11826	1.11935	0.532252	0.781037	1.14214	0.582566	0.00104	0.017
Gm973	9.07573	4.98059	8.83336	34.0375	7.62679	5.84546	3.19343	2.56449	2.74809	1.52367	3.03318	0.00105	0.017
Gemin7	41.2354	33.204	32.5206	38.0322	46.1473	66.9941	40.4282	52.3059	65.26	-0.665806	5.54374	0.00105	0.017
Hc	0.559012	0.440461	0.29609	1.75112	0.246025	0.10166	0.197532	0.193546	0.0289273	2.09995	-1.10197	0.00105	0.017
Polr1a	19.1051	19.0076	18.9991	29.2766	17.0109	10.6235	13.4322	10.3063	7.89715	0.763783	3.9964	0.00105	0.017
Zfp866	19.6312	13.722	14.2123	20.6304	11.9147	11.6909	9.67907	8.41926	8.59141	0.671883	3.70577	0.00105	0.017
Arhgap33	46.2007	46.9938	54.53	80.9895	47.6938	32.9887	33.6134	25.0642	20.2202	0.743816	5.40171	0.00106	0.017
Bmpr1a	21.8015	24.9707	27.8818	62.9858	21.5448	17.7905	19.0289	14.9514	14.8686	0.821783	4.6029	0.00106	0.017
Brp44l	107.067	99.5441	91.5413	79.8403	113.664	176.177	119.836	162.724	172.927	-0.727162	6.98331	0.00106	0.017
Dennd4c	5.35994	4.20132	3.1583	9.68591	3.23348	3.35479	1.51441	1.54837	1.04138	1.28562	1.83985	0.00106	0.017
Fam103a1	75.927	68.5763	65.7321	66.7069	87.5499	118.688	80.7248	105.144	114.436	-0.626564	6.45828	0.00106	0.017
Htr2c	5.52436	8.91086	10.2645	9.95952	3.65524	5.79463	4.97122	2.99997	3.99197	0.940325	2.63812	0.00106	0.017
Trappc6b	90.6915	81.553	71.4565	75.0247	102.311	145.425	95.6055	113.612	129.797	-0.631266	6.66493	0.00106	0.017
Grin2c	14.7316	10.3339	12.7319	56.6379	10.2628	11.6909	7.63791	8.22571	5.64082	1.26375	3.84181	0.00106	0.017
Mrps12	90.3627	71.1175	70.2721	70.5375	85.7223	160.572	89.4162	128.128	163.468	-0.810087	6.70885	0.00106	0.017
Invs	9.33879	5.31941	5.77376	17.8396	4.49875	4.98135	3.98356	4.59672	2.60346	1.07203	2.66175	0.00106	0.017
Gse1	19.138	13.722	22.2068	19.4813	14.867	11.1826	8.39511	4.83866	6.0458	0.98024	3.72328	0.00107	0.017
1110059E24Rik	37.9142	38.3201	31.583	35.7339	41.6134	63.5885	43.49	59.1768	59.8216	-0.656743	5.52921	0.00107	0.0171
Ndufb4	30.0222	25.2757	21.4666	20.8493	33.0026	56.4722	27.4899	39.5318	46.4572	-0.795949	5.07734	0.00107	0.0171
Ddit3	30.3182	22.1247	21.2198	26.048	31.2804	45.9504	27.6545	44.9511	43.7959	-0.721974	5.04159	0.00108	0.0171
Qser1	10.0293	6.70855	8.24118	10.3426	5.55315	5.64214	4.83954	4.3064	2.95058	0.845535	2.69546	0.00108	0.0171
Rai1	36.0727	38.354	42.8344	43.7234	32.8971	24.3476	24.9878	13.2095	16.7778	0.772024	4.9119	0.00107	0.0171
Mrpl42	101.543	83.2809	77.6744	83.452	103.506	148.983	104.791	147.966	138.012	-0.652017	6.79429	0.00108	0.0172
BC007180	53.8296	17.0424	29.1649	13.6807	16.1674	16.1131	6.97947	5.08059	8.67819	1.40536	4.21562	0.00109	0.0172
Csf2rb2	1.57839	0.982566	0.838923	1.6964	0.562344	0.864112	0.197532	0.193546	0.260346	1.56234	-0.241121	0.00109	0.0172
Setx	43.9318	46.9599	52.7534	53.7376	40.8402	33.9545	30.5187	23.903	20.7987	0.648884	5.2586	0.00109	0.0172
Phlda1	117.491	115.536	98.0059	87.3373	142.343	150.66	146.865	182.804	210.706	-0.753207	7.14803	0.00109	0.0173
Anln	9.93069	8.13158	11.8436	13.8995	6.46695	9.04776	4.54324	3.53222	3.8184	0.931614	2.96237	0.0011	0.0173
Bag1	167.572	131.122	125.592	164.496	182.41	296.136	162.701	216.143	234.166	-0.652206	7.54818	0.0011	0.0173
Phf5a	33.9353	25.7839	26.6481	22.9835	32.7917	57.6922	34.4035	46.9833	51.2302	-0.772496	5.22603	0.0011	0.0173
5730559C18Rik	1.24956	1.21974	1.08566	1.75112	0.632637	0.508301	0.790128	0.241933	0.260346	1.33043	-0.12381	0.00111	0.0173
Acot13	109.534	96.3592	89.7647	72.5622	116.686	190.257	115.918	152.031	167.547	-0.750191	6.9651	0.00111	0.0173
Ifi203	7.26716	2.27007	3.35569	3.94003	1.82762	2.79566	0.855972	0.967731	0.462837	1.58588	1.40631	0.00111	0.0173
Lzts1	1.08514	1.18586	1.82589	1.6964	0.773223	0.304981	0.65844	0.193546	0.0867819	1.74082	-0.11838	0.0011	0.0173
Macrod1	46.4967	47.2987	44.4629	42.027	54.6176	76.4485	55.2431	71.0798	77.4962	-0.647441	5.85728	0.00111	0.0173
Maml3	3.09101	1.96513	3.25699	6.01949	1.89791	1.93154	1.21811	0.387092	0.838891	1.40214	1.17641	0.0011	0.0173
Pot1b	2.00587	0.745395	1.08566	3.88531	0.632637	0.762452	0.460908	0.677412	0.549619	1.48369	0.270752	0.00111	0.0173
Rgs10	128.573	100.628	92.4296	66.6522	134.752	230.311	126.486	172.788	173.072	-0.834681	7.10582	0.0011	0.0173
Zfp287	16.5073	12.4684	11.893	26.5952	10.9657	11.081	8.75725	7.79023	7.37646	0.75859	3.62258	0.00111	0.0173
Zfp783	15.8496	7.38619	9.03076	36.4453	8.64604	8.53946	6.25518	5.85477	4.65729	1.17868	3.43656	0.00111	0.0173
Dusp11	43.7345	19.3125	17.0252	43.2309	15.7808	25.0084	9.05355	8.90313	9.89313	1.08544	4.36748	0.00111	0.0173
Gm1673	52.6787	38.5911	38.6891	31.7939	48.9239	102.778	50.1073	67.5476	84.8148	-0.866476	5.85784	0.00111	0.0173
Prkcd	18.9735	15.1451	22.7003	28.8388	9.48955	18.1463	10.6009	3.82254	6.13259	1.08884	3.85722	0.00112	0.0173
Tmem85	175.596	163.75	148.835	138.941	197.418	273.923	194.602	255.578	288.868	-0.70185	7.69282	0.00112	0.0173
Tcf7l2	6.8068	4.47237	7.55031	37.3756	5.30712	5.18467	2.76545	3.77415	3.70269	1.55026	2.98339	0.00112	0.0173
Nop10	116.242	89.5829	85.8662	63.5877	113.523	219.688	108.313	168.288	181.808	-0.887565	7.01227	0.00112	0.0174
Phldb2	17.724	4.98059	10.0671	27.7991	7.38076	9.35274	3.2922	3.2419	2.34311	1.45783	3.18616	0.00112	0.0174
Ccdc123	19.1708	8.67369	8.78402	25.446	7.09959	10.8268	6.2881	5.99993	5.87224	0.987681	3.40147	0.00112	0.0174
Gm17282	12.2983	5.04836	4.4907	16.9093	3.19833	7.31953	2.33746	1.54837	1.88027	1.48234	2.54793	0.00113	0.0175
Dnajc13	40.4791	31.1033	35.9256	46.8426	29.1716	30.3964	22.9466	18.3869	14.7529	0.663476	4.88458	0.00113	0.0175
Rasa3	32.9488	44.4188	50.4834	69.8808	31.3858	21.9586	37.2019	23.5159	15.9968	0.821504	5.16212	0.00113	0.0175
Elof1	47.812	36.2533	35.2841	41.1514	49.7323	74.6694	45.2678	63.1928	62.7433	-0.638271	5.67319	0.00114	0.0175
Guk1	168.033	133.29	141.827	151.582	175.803	316.519	166.717	231.336	276.313	-0.728486	7.62275	0.00114	0.0175
Hecw1	35.711	40.353	46.6342	36.2264	32.2645	20.332	25.0536	19.1127	17.2696	0.736623	4.92388	0.00114	0.0175
Cdh19	2.79506	2.10066	3.01025	5.63643	1.65189	2.0332	0.49383	1.20966	0.578546	1.41606	1.09483	0.00114	0.0175
Mllt11	323.405	293.11	246.347	287.786	342.503	503.523	352.792	480.866	503.769	-0.686479	8.54754	0.00114	0.0175
Swi5	188.552	148.198	143.851	138.448	188.561	324.347	183.046	254.562	299.542	-0.763727	7.71362	0.00115	0.0175
P2ry13	2.40046	3.18487	2.91156	3.88531	1.33557	1.88071	1.81071	1.01612	1.07031	1.03463	1.13739	0.00115	0.0176
Ston2	28.7069	18.0928	47.3745	20.4663	18.1004	7.67535	3.95064	0.870958	1.44636	2.1583	4.02131	0.00115	0.0177
Icam5	73.132	49.9753	67.4593	66.8711	42.8436	47.4753	43.5558	19.6449	24.9353	0.789645	5.5812	0.00116	0.0177
Gm17066	2.03875	1.08421	1.18436	3.83058	0.843516	1.06743	0.526752	0.629025	0.549619	1.35775	0.393115	0.00116	0.0177
Pion	6.14914	3.3204	4.14527	23.2571	3.97155	3.96475	1.77779	2.27417	1.38851	1.60556	2.37563	0.00116	0.0177
Acp1	62.4121	58.3102	55.1715	46.8973	68.0436	93.7815	76.412	89.6119	89.7325	-0.652514	6.17211	0.00117	0.0178
Aox1	3.35407	2.0329	1.6285	9.08396	1.65189	1.72822	1.21811	1.11289	0.694255	1.48575	1.26411	0.00117	0.0178
C2cd3	19.7956	17.754	19.7887	22.3268	15.9917	9.65772	12.675	7.59669	5.93009	0.864537	3.85773	0.00117	0.0178
Dync2h1	34.5272	27.478	29.6584	76.8853	24.2511	30.3456	17.4487	17.7579	19.8152	0.80972	4.89689	0.00117	0.0178
Ranbp1	156.556	141.659	127.763	157.711	167.824	251.05	173.598	228.917	244.87	-0.636281	7.52939	0.00117	0.0178
Smarcad1	21.1767	19.9901	20.9237	27.9085	15.1481	15.6557	15.2429	10.4515	12.6702	0.608365	4.13205	0.00117	0.0178
Sumo3	197.693	175.981	169.314	188.355	224.832	317.027	212.38	278.416	301.943	-0.628769	7.85414	0.00117	0.0178
Tyk2	13.7451	7.69112	9.72164	25.8291	7.5565	8.38697	7.30869	3.67738	3.21093	1.11841	3.21823	0.00117	0.0178
Apc2	152.282	158.6	199.219	111.634	122.591	72.5346	93.0376	66.7251	64.7103	0.841194	6.86148	0.00118	0.0178
Mkl2	65.24	52.5165	60.4024	123.837	47.6235	60.742	35.3253	32.3222	37.8948	0.705225	5.79743	0.00118	0.0178
Mrpl12	138.602	109.709	106.889	97.8988	134.224	233.666	136.396	197.514	222.943	-0.778466	7.27624	0.00118	0.0178
Uqcr11	189.702	133.222	124.703	129.255	169.476	359.318	166.059	257.9	302.927	-0.870036	7.68302	0.00118	0.0178
Dennd4a	29.4632	27.0375	28.9182	37.7039	24.6728	17.1297	20.7409	12.5321	14.6661	0.685281	4.54973	0.00118	0.0178
Magi3	33.6394	31.476	33.5076	44.8178	30.1557	20.8403	22.7162	18.4837	16.2571	0.632691	4.79093	0.00119	0.0178
Med13	40.0516	31.5099	30.9908	61.0705	29.277	31.0064	21.3664	21.4352	19.1788	0.63656	4.95627	0.00119	0.0178
Stx8	46.2336	37.4053	35.4322	36.1717	48.0101	68.9256	47.9674	57.4832	68.3552	-0.660027	5.6477	0.00119	0.0178
Aurkaip1	108.218	95.5122	89.2713	90.2924	106.002	187.919	117.334	159.337	189.416	-0.744336	7.00653	0.00119	0.0178
Sncb	920.266	815.564	704.103	639.872	955.457	1349.39	1046.92	1466.11	1563.26	-0.805715	10.0621	0.00119	0.0178
Cox6c	558.289	433.684	403.769	291.891	528.744	1018.13	563.46	807.959	942.075	-0.928625	9.28992	0.00119	0.0178
Ankrd23	3.84732	0.84704	1.23371	6.07421	0.878662	1.16909	0.526752	1.01612	0.694255	1.65026	0.825841	0.0012	0.0179
Thpo	9.33879	2.30395	3.25699	8.15367	2.0385	3.65977	1.25104	1.93546	1.33066	1.41219	1.85947	0.0012	0.0179
Nol7	33.5407	26.326	26.9442	25.8838	31.8779	57.5905	34.2389	49.7414	51.2013	-0.745762	5.24526	0.0012	0.0179
Cwc15	72.8031	64.5105	61.3401	58.8816	77.7089	115.842	78.6507	99.0473	110.734	-0.655842	6.37662	0.0012	0.0179
Rtel1	8.77978	6.26809	6.36594	25.6102	5.79917	5.79463	5.00415	3.14513	2.97951	1.20947	2.88022	0.00121	0.0179
Rif1	24.0704	24.903	25.9079	47.0067	22.2126	18.9088	17.9425	16.4514	13.4223	0.662207	4.51978	0.00121	0.018
Chmp5	131.664	121.33	112.268	94.9985	148.635	209.928	143.935	184.062	214.207	-0.715269	7.2607	0.00121	0.018
AW047730	29.2988	10.029	14.0643	32.943	12.3364	14.8932	4.31278	5.08059	5.7276	1.26008	3.78387	0.00121	0.018
1700029J07Rik	9.30591	2.98158	3.40504	13.9543	2.35481	4.62554	0.888894	2.08062	1.70671	1.55134	2.13433	0.00122	0.0181
Tle4	29.3975	35.9822	38.5411	61.2894	28.9607	24.7543	26.3705	23.7578	19.5548	0.631083	4.97783	0.00122	0.0181
3632454L22Rik	1.08514	0.779277	0.444136	1.91529	0.421758	0.304981	0.362142	0.241933	0.376055	1.44379	-0.490727	0.00122	0.0181
Lrrc38	14.7645	14.603	12.8306	10.069	21.2285	17.8922	18.8972	26.9997	25.8031	-0.837069	4.21659	0.00122	0.0181
Ndufa8	278.52	246.285	225.868	229.233	284.616	477.091	299.294	404.27	460.32	-0.72927	8.35029	0.00123	0.0181
6330512M04Rik	119.103	98.0872	89.0739	77.4325	128.039	171.45	131.326	148.498	146.372	-0.659927	6.96139	0.00123	0.0181
Gpx1	113.545	86.127	87.1493	77.1042	111.66	204.49	103.54	162.288	170.006	-0.789424	6.9689	0.00123	0.0181
Csnk1g1	30.2195	22.0569	18.5057	34.6942	15.7808	19.8746	15.5392	11.516	14.9265	0.665526	4.32499	0.00124	0.0182
Epc1	16.1127	11.4859	16.1863	27.416	10.3682	13.9783	9.38277	6.62896	6.30615	0.834202	3.67306	0.00124	0.0182
Fis1	117.984	93.6487	91.9361	93.3568	120.517	207.133	112.692	155.514	175.762	-0.708704	7.03215	0.00124	0.0182
Itga8	12.66	5.69211	4.78679	30.0975	5.30712	7.52286	2.66668	1.40321	2.28526	1.65236	2.90746	0.00123	0.0182
Pkd1l3	1.64415	0.880921	0.838923	1.58696	0.773223	0.406641	0.460908	0.241933	0.173564	1.48542	-0.254468	0.00124	0.0182
Txnl4a	60.4391	50.077	47.1771	50.7279	61.3658	84.8354	65.1197	83.7087	87.2736	-0.636016	6.05298	0.00124	0.0182
Cox7a2	391.703	300.259	289.873	206.469	378.352	700.236	389.336	559.929	644.413	-0.903817	8.76641	0.00124	0.0182
Gm12917	0.230182	0.135526	0.0493484	1.14918	0.070293	0	0	0.0483866	0	3.58283	-2.07336	0.00125	0.0182
2010107H07Rik	14.0082	12.1635	14.163	8.37256	16.554	31.0572	15.8684	23.2739	23.1418	-0.895097	4.16232	0.00125	0.0182
Celf1	146.593	127.869	127.072	188.848	109.587	106.286	106.634	79.0636	75.6159	0.535955	6.86961	0.00125	0.0182
Eef1e1	85.2987	73.5908	66.4229	55.1057	86.7415	134.242	91.4903	117.144	135.785	-0.756109	6.57613	0.00125	0.0182
Ubxn1	55.7368	45.4013	43.9201	44.4348	57.8863	93.4766	56.5929	67.8379	80.0418	-0.658025	5.93325	0.00125	0.0182
Xpo1	54.7174	56.8872	52.556	97.2421	45.2687	28.2107	45.169	38.7576	24.4436	0.726275	5.5943	0.00125	0.0182
Fasn	78.6892	128.276	151.006	158.86	100.449	45.7979	82.2063	44.8543	37.8948	0.968537	6.50539	0.00126	0.0183
6530401N04Rik	22.5249	24.7674	22.799	27.3066	27.8009	40.4099	30.5845	36.677	39.6882	-0.614678	4.9342	0.00126	0.0184
Kcnc4	9.60186	10.6049	12.6332	22.2721	8.92721	5.7438	7.96713	3.48383	5.90117	0.974505	3.24566	0.00127	0.0184
1110001J03Rik	42.2219	30.2224	30.2999	28.4558	39.0829	73.3987	37.3665	59.9509	67.9502	-0.830593	5.52475	0.00128	0.0185
H2-Ke2	63.9905	53.499	48.7562	56.036	64.2478	108.116	63.8358	85.3539	102.837	-0.692649	6.18027	0.00128	0.0185
Kcnip3	22.229	20.0918	20.1835	50.5637	16.3783	15.4524	18.14	8.56442	11.5998	0.87358	4.29997	0.00128	0.0185
Plxnb2	13.1861	13.7559	20.677	50.1807	15.2536	10.166	11.1276	4.93543	4.85978	1.25602	3.92924	0.00128	0.0185
Ngfrap1	291.213	242.592	219.058	205.1	298.113	469.467	305.845	375.431	446.637	-0.732402	8.32528	0.00129	0.0186
Robo2	30.2853	36.8632	33.9024	62.2744	26.8168	22.4669	29.6298	13.0644	12.1495	0.866341	4.85671	0.00129	0.0186
Arl6ip4	75.9599	61.6645	52.8028	63.2594	78.0604	126.669	71.6712	93.5312	116.432	-0.696485	6.37331	0.00129	0.0186
Zfp280d	22.7222	20.2612	21.2198	23.9685	15.605	17.2822	13.9919	10.9837	9.31459	0.647114	4.09815	0.0013	0.0187
Rasgrf1	148.566	234.19	250.986	238.755	151.341	65.6725	157.268	79.9346	57.9703	1.01181	7.25417	0.0013	0.0187
Scube1	7.49734	7.01349	6.71138	12.039	5.55315	4.77803	4.47739	3.77415	2.57453	0.873632	2.5768	0.0013	0.0187
Sema5b	6.34643	4.16744	5.08289	12.7504	3.83097	4.47305	2.60084	1.7903	1.21495	1.24119	2.18114	0.0013	0.0187
Rfx1	11.6406	7.48783	7.79705	20.0832	7.16988	6.7604	5.62966	4.54834	4.65729	0.900021	3.03501	0.0013	0.0187
Tbc1d8b	6.28067	5.55658	6.16855	7.77061	3.26862	2.28735	4.67493	2.66126	2.57453	0.950236	2.2037	0.00131	0.0187
Npas4	4.17615	2.30395	2.17133	4.65142	1.40586	1.82988	1.84363	0.580639	0.6364	1.30926	1.12777	0.00131	0.0187
Arid1b	77.1766	77.5888	117.499	92.536	73.9482	62.4194	45.1032	28.5481	25.9767	0.9043	6.04415	0.00132	0.0188
Car12	7.26716	7.31842	7.05682	13.4618	4.28787	4.2189	5.95888	1.7903	3.29771	1.04539	2.57991	0.00132	0.0188
Casz1	12.2654	9.99507	9.62294	8.31784	14.8318	18.1463	13.4322	17.903	16.0836	-0.741028	3.76902	0.00132	0.0188
Cmc1	13.1861	10.6388	10.5112	7.55172	14.0234	23.2802	13.7285	20.7094	20.683	-0.874724	3.92743	0.00132	0.0188
Gm7173	2.30182	0.609869	0.93762	5.63643	0.738076	0.660791	0.230454	0.822571	0.3182	1.91451	0.40287	0.00132	0.0188
Muted	44.0633	43.5717	39.232	39.1814	51.4193	63.741	52.6752	63.7251	69.628	-0.617293	5.71738	0.00132	0.0188
Tmsb4x	1243.64	925.848	862.758	1002.41	1324.07	2463.07	1122.71	1527.47	1882.56	-0.79368	10.4287	0.00132	0.0188
Agrn	55.6711	45.9096	52.26	142.936	45.0578	50.8301	36.1154	25.9836	24.675	0.889561	5.67083	0.00133	0.0188
D8Ertd738e	81.9775	51.0257	48.9043	63.0405	76.303	134.242	65.8769	105.144	118.284	-0.790584	6.38138	0.00133	0.0188
Ptch1	10.1938	10.3	15.4954	35.2414	9.80587	8.64112	8.06589	6.67734	7.34753	0.979768	3.58055	0.00133	0.0188
Acap3	90.9875	96.7997	105.852	171.993	88.288	68.9256	79.1774	61.3541	47.9614	0.643749	6.46464	0.00134	0.0189
Uqcrb	183.652	145.725	137.337	99.9783	173.589	308.945	185.022	274.69	310.737	-0.884103	7.68412	0.00135	0.0191
B230206F22Rik	26.997	9.7579	6.56334	43.6687	6.08034	15.0457	3.02882	4.54834	4.773	1.57885	3.65038	0.00135	0.0191
Ncapd3	16.8361	17.3474	13.176	27.0877	14.5506	10.3693	10.568	7.06444	7.46324	0.788221	3.76307	0.00136	0.0191
Fam48a	36.9935	28.9688	24.8222	67.4183	25.4812	23.8901	23.2759	20.032	15.8232	0.735951	4.84559	0.00136	0.0192
Mccc1	33.5736	22.2263	21.1705	51.9865	18.7682	20.6879	16.8231	19.3062	15.0711	0.704371	4.57218	0.00136	0.0192
Mamdc2	0.624778	0.271053	0.986968	4.37781	0.281172	0.406641	0.460908	0.14516	0.173564	2.17503	-0.26061	0.00136	0.0192
Atxn7	24.2019	13.6543	12.2878	36.1717	12.9691	14.6391	9.74491	8.03217	8.07071	0.893385	3.90927	0.00137	0.0192
C1ql3	7.85906	6.60691	6.66203	13.5165	4.11214	5.43882	4.21402	1.49998	3.96304	1.05584	2.55392	0.00137	0.0192
Commd9	58.6634	50.8224	49.7432	53.1357	62.7013	82.4973	64.1979	90.7248	85.2487	-0.622786	6.06987	0.00137	0.0192
Mrps18c	26.8655	22.7345	21.2198	22.491	27.9415	48.5427	26.7327	36.9673	40.585	-0.703948	4.94214	0.00137	0.0192
Banf1	67.2459	49.0605	50.8289	50.3448	64.5641	113.605	60.9057	91.7409	106.424	-0.760781	6.20075	0.00138	0.0194
Cacnb2	46.135	42.5892	37.5541	58.006	34.4084	33.2429	31.3747	27.1932	20.1912	0.565794	5.17989	0.00139	0.0194
Ndufb9	289.305	257.127	241.018	206.633	295.477	520.094	301.467	439.689	514.501	-0.805981	8.43191	0.00138	0.0194
Trerf1	19.8285	20.8711	18.8017	31.575	18.4168	9.14942	13.6956	9.48376	6.27722	0.894769	4.01585	0.00138	0.0194
Dsel	9.04285	7.31842	8.88271	16.3621	6.25608	6.40459	6.02473	2.85481	3.41342	0.950456	2.85441	0.00139	0.0194
Thoc7	52.4485	43.3684	44.8577	33.9828	56.4453	89.3085	52.5435	73.6927	76.5705	-0.733282	5.87979	0.0014	0.0195
Cxx1b	60.9323	51.9066	47.6212	39.7834	57.1833	92.7649	70.8482	84.4829	94.7079	-0.744347	6.08223	0.0014	0.0195
Bcl6	24.1033	20.3967	21.5653	40.5495	21.123	13.5716	15.9672	11.516	10.4428	0.759682	4.28516	0.00141	0.0196
Cox6b1	666.047	508.461	482.775	351.046	623.218	1193.34	652.218	978.279	1104.18	-0.916071	9.53141	0.00142	0.0196
Cuedc1	40.2489	19.0415	24.4768	35.0772	17.8896	25.3642	12.3787	12.4837	12.352	0.813224	4.44283	0.00142	0.0196
Daam2	19.2037	11.0115	15.1006	47.7729	9.87616	17.4347	6.09057	8.03217	6.07473	1.16263	3.88602	0.00142	0.0196
Denr	84.9699	81.0109	77.7731	81.5915	97.6018	145.018	92.6096	121.934	127.454	-0.600345	6.67064	0.00142	0.0196
Gm15594	7.03698	2.64276	1.77654	8.37256	1.30042	3.55811	0.526752	0.629025	0.665328	1.82448	1.50923	0.00141	0.0196
Gon4l	11.805	11.3165	13.2254	15.3771	9.45441	6.30293	7.90128	3.09674	5.0912	0.933992	3.20574	0.00141	0.0196
Pigyl	44.8525	32.628	33.6063	39.455	43.8277	79.9049	39.8027	63.2896	71.7686	-0.749349	5.65305	0.00142	0.0196
Plekho1	76.5189	66.6112	58.6752	50.509	78.8687	110.555	83.9511	108.918	103.907	-0.690236	6.3784	0.00141	0.0196
Selm	316.467	237.239	221.426	209.588	297.62	531.988	293.203	440.076	494.772	-0.81154	8.4182	0.00141	0.0196
Sh3bgr	2.30182	1.69408	1.48045	1.47751	4.32302	3.65977	2.37038	3.19351	4.36802	-1.11071	1.53321	0.00142	0.0196
Ttll8	0.624778	0.304934	0.690878	3.17391	0.105439	0.355811	0.197532	0.290319	0	2.49501	-0.654065	0.00142	0.0196
AI413582	48.371	34.9997	34.8893	37.1019	46.1122	87.4786	44.0826	62.709	64.5946	-0.71916	5.68543	0.00143	0.0196
Dst	1649.22	920.36	1571.35	994.529	984.945	561.673	167.343	119.95	167.315	1.66699	9.61258	0.00143	0.0196
Fabp3	76.5189	61.0546	55.9611	43.6139	76.1624	111.826	78.1568	105.096	118.544	-0.789574	6.36056	0.00143	0.0196
Rhbdf1	11.8708	7.25066	7.89574	45.8028	7.94311	8.89527	4.83954	4.83866	3.38449	1.42587	3.40379	0.00143	0.0196
Bex2	351.29	305.205	274.328	266.171	360.814	597.355	366.949	477.237	581.583	-0.744945	8.65286	0.00144	0.0197
Clec2l	195.917	186.01	177.753	125.041	225.57	308.844	232.759	304.642	314.96	-0.757463	7.87035	0.00144	0.0197
Ndufa5	163.133	133.629	114.143	98.8838	143.609	287.444	169.812	227.078	267.549	-0.845611	7.4987	0.00144	0.0197
Otud4	28.3781	22.1247	20.0355	44.9273	20.5958	19.4171	16.3293	13.5966	10.6742	0.730269	4.40797	0.00144	0.0197
Snapc5	29.3317	21.4132	16.4824	26.431	28.5741	47.882	27.029	37.6931	40.8743	-0.725991	4.94598	0.00144	0.0197
Plcd4	10.7528	8.74145	8.63597	44.5989	7.5565	6.45542	5.36629	8.37087	4.42588	1.30017	3.44992	0.00144	0.0197
Trank1	104.108	28.5961	39.0839	118.091	27.8009	58.353	16.6256	14.8063	18.3399	1.32492	5.49251	0.00144	0.0197
2310021P13Rik	46.5953	53.6684	55.4676	88.1034	48.3616	37.2076	40.0002	25.3062	22.9972	0.710231	5.50624	0.00145	0.0198
Gm12749	1.47974	0.64375	0.444136	0.985007	0.316318	0.355811	0.098766	0.338706	0.260346	1.6278	-0.695356	0.00145	0.0198
Nvl	45.3129	26.8342	23.3418	80.6064	20.7364	31.413	18.9631	19.9353	18.5424	0.87034	4.93061	0.00145	0.0198
Tceal6	93.1578	82.0612	73.6772	61.1252	98.1993	140.444	97.7125	132.676	152.042	-0.749512	6.71631	0.00146	0.0198
Atp6v1f	170.104	145.115	137.83	120.061	170.39	279.362	177.417	244.207	281.318	-0.756666	7.60309	0.00146	0.0199
Tfcp2l1	1.5455	1.32138	0.888271	6.23838	0.808369	0.304981	0.888894	0.629025	0.607473	1.70277	0.521551	0.00146	0.0199
1700037H04Rik	102.957	87.7872	83.7936	67.4183	103.366	151.931	112.857	151.16	169.659	-0.759456	6.86449	0.00148	0.0199
2410015M20Rik	62.6751	55.9046	53.0495	51.1657	62.7013	119.857	63.2103	93.6764	104.225	-0.741971	6.22513	0.00147	0.0199
Anapc13	25.8132	19.9563	19.3446	18.6604	26.1138	45.5438	23.5722	35.0802	40.4693	-0.774443	4.83973	0.00148	0.0199
Bmpr1b	5.68877	7.58948	7.55031	49.0315	7.87281	4.7272	3.32512	4.25802	3.8184	1.63711	3.25789	0.00148	0.0199
Gm13665	0.822077	0.372697	0.29609	1.6964	0.0351465	0.254151	0.032922	0.338706	0.0867819	2.30134	-1.06824	0.00147	0.0199
Kctd4	26.3065	17.3135	22.1081	30.8636	18.241	16.2656	13.9589	7.64507	8.18642	0.827675	4.13417	0.00147	0.0199
Rmst	1.90722	0.982566	0.838923	5.96477	0.210879	1.5249	0.296298	0.241933	0.144636	2.21844	0.359223	0.00148	0.0199
Tcap	3.78155	4.57401	2.91156	4.81559	7.31047	6.81123	5.06999	7.74185	7.86822	-0.889592	2.53394	0.00147	0.0199
Wdr81	14.4686	14.9418	16.285	21.0135	13.3205	6.55708	10.535	6.43541	5.0912	0.897115	3.57947	0.00147	0.0199
Mypop	46.8913	37.6086	34.4945	33.7639	44.2143	65.0117	49.0538	70.0153	68.6445	-0.714821	5.66457	0.00148	0.02
E030013I19Rik	1.01938	0.677632	0.93762	2.07946	0.738076	0.355811	0.296298	0.241933	0.260346	1.47701	-0.365932	0.00149	0.02
9530059O14Rik	72.2112	20.4645	18.0615	79.4573	13.8126	35.6827	10.14	15.5321	11.137	1.36016	4.86855	0.00149	0.02
Bola2	42.9124	28.5961	28.2766	27.7991	38.0636	77.0076	36.5105	54.7736	68.3263	-0.853444	5.49893	0.00149	0.02
Cacna1c	10.0622	7.21678	7.7477	17.8943	5.93976	8.18365	4.54324	3.5806	3.32664	0.964757	2.88433	0.00149	0.02
Fam53b	25.2871	23.9882	25.6612	47.8276	23.021	16.2148	19.424	14.9998	13.3933	0.696707	4.51291	0.00149	0.02
AI462493	39.098	31.3405	27.7338	30.8088	39.7858	70.8572	34.206	52.4994	63.4954	-0.768715	5.45121	0.0015	0.0201
Pcgf6	32.5871	10.6049	11.6462	34.0375	10.4737	13.9274	8.19758	9.19344	8.88068	1.01495	3.91157	0.0015	0.0201
Map1lc3a	371.48	283.589	284.444	219.438	367.246	584.851	377.747	520.543	553.697	-0.793662	8.64941	0.0015	0.0201
Gm10544	1.01938	0.474342	0.0493484	1.97001	0	0.10166	0.131688	0.0483866	0.231418	2.77442	-1.01586	0.0015	0.0201
Itpr2	19.1708	12.2313	15.4954	59.593	12.6527	17.3839	6.8807	7.40314	7.40539	1.21207	4.04593	0.00151	0.0201
Tceb1	122.194	116.519	100.819	105.779	130.745	197.729	136.593	168.434	184.701	-0.631531	7.14709	0.00151	0.0201
Anks6	10.3911	5.55658	6.3166	14.7204	4.25273	6.55708	4.74077	3.43545	2.92166	0.970858	2.67402	0.00152	0.0202
Npr2	29.4304	24.0559	23.6379	73.4925	20.9473	21.9078	21.6956	14.8063	14.1454	0.861465	4.70241	0.00152	0.0202
2210013O21Rik	43.7674	31.4421	33.853	27.9633	40.8051	77.3634	41.9097	56.2252	69.0784	-0.800052	5.57112	0.00152	0.0202
Col6a1	35.0534	21.752	24.0327	140.473	12.5473	15.4524	17.2841	27.1932	18.5713	1.37557	5.01572	0.00153	0.0203
Hax1	39.9201	35.8128	36.3204	28.401	43.4762	61.6061	45.169	58.7897	64.1897	-0.706012	5.54592	0.00153	0.0203
Atp5e	123.64	92.2257	94.3541	67.8013	113.629	242.561	112.067	188.562	194.739	-0.902602	7.11226	0.00153	0.0203
Leprel2	15.6523	6.77632	8.38923	38.7983	5.9749	11.1826	5.26752	4.98381	4.83086	1.27648	3.41163	0.00154	0.0204
Cep135	30.943	10.3678	16.4824	11.7654	10.2979	11.8942	4.14817	3.2419	3.23986	1.39375	3.49913	0.00155	0.0205
Ndufa3	222.125	166.935	154.905	121.758	189.826	373.55	216.759	335.658	381.059	-0.912351	7.93317	0.00155	0.0205
2610021A01Rik	16.606	18.2283	15.8902	21.506	13.6017	10.5727	12.0165	9.87086	7.75251	0.659214	3.79869	0.00156	0.0205
Ccnl2	138.504	62.3421	65.0905	314.217	61.2252	94.7981	42.7328	50.4672	43.5066	1.15383	6.5097	0.00156	0.0205
Hdgf	217.883	193.396	180.714	202.583	245.217	328.82	235.524	290.658	340.648	-0.621899	7.96976	0.00155	0.0205
Park7	243.927	221.891	200.453	192.514	262.896	419.501	259.162	326.706	377.096	-0.685724	8.13419	0.00155	0.0205
Serp2	79.314	61.8	59.8103	57.2946	85.2654	132.921	71.77	94.7893	119.18	-0.711214	6.41808	0.00155	0.0205
Ccdc56	149.158	124.481	118.782	123.4	146.034	255.32	152.429	203.804	235.439	-0.699552	7.40283	0.00156	0.0205
Lrrc16a	18.8749	20.7694	16.3343	61.6724	17.1515	10.8776	15.638	11.6128	8.04179	1.04894	4.2625	0.00156	0.0205
BC016423	54.5201	49.1283	67.3112	33.7091	45.1632	24.5509	14.1235	10.3063	10.327	1.2754	5.10153	0.00156	0.0205
Ubr2	31.7979	34.5931	42.3409	59.976	31.0695	30.1423	26.8973	19.2578	19.3234	0.637663	5.01011	0.00157	0.0205
Fahd1	47.5818	42.2165	41.8968	40.0022	46.4285	73.5003	54.2884	79.112	99.6256	-0.807222	5.89338	0.00158	0.0206
Qk	228.603	213.014	251.627	753.148	198.718	237.173	146.766	140.998	127.801	0.9384	7.92251	0.00157	0.0206
Kdm2b	13.1203	12.7056	13.6695	21.9985	10.5088	10.0644	9.8766	7.01605	6.45079	0.704808	3.52744	0.00158	0.0206
Plch2	83.7203	74.5056	79.2535	115.629	73.0696	59.9795	59.2925	40.9834	38.7915	0.60677	6.09453	0.00158	0.0207
Arid3b	7.16851	3.28651	3.50374	13.7901	3.12804	4.01558	2.46915	1.88708	1.88027	1.23243	2.13525	0.0016	0.0209
Klhdc7a	3.12389	1.49079	3.50374	17.1829	2.42511	2.38901	0.98766	1.35482	0.896746	1.77692	1.77576	0.0016	0.0209
Nphs1	0.789194	0.542105	0.690878	1.80585	0.421758	0.10166	0.32922	0.14516	0.347127	1.5842	-0.673787	0.00161	0.0209
Rnf182	39.1966	20.024	25.0196	31.4655	14.6209	27.3974	11.3252	12.0483	12.2073	0.840546	4.40139	0.0016	0.0209
Zcchc17	139.391	120.754	110.639	123.454	150.989	230.057	140.116	183.579	190.689	-0.610964	7.27919	0.0016	0.0209
Cycs	227.88	218.638	193.643	167.342	232.775	380.311	263.837	350.657	394.25	-0.754732	8.09782	0.00161	0.0209
Ell	20.9465	17.7878	17.7654	34.2564	15.0076	13.3175	15.0124	12.8708	10.0667	0.658121	4.09849	0.00161	0.0209
Smarca2	272.634	271.154	335.273	261.684	236.009	139.376	185.483	135.821	131.648	0.716662	7.77208	0.00161	0.0209
Lrp1b	45.2471	29.477	24.6249	112.838	15.7105	44.6797	13.8272	13.7418	11.542	1.29192	5.01779	0.00162	0.0209
Mrps21	53.5337	34.9658	37.6528	38.1964	45.2335	94.239	47.8357	74.7572	75.4134	-0.787151	5.8138	0.00162	0.0209
Pts	31.0087	27.2408	25.217	29.988	34.4084	49.5085	32.5599	40.9834	46.1969	-0.605736	5.15111	0.00162	0.0209
Slc1a2	370.822	283.691	366.757	1569.28	346.896	306.251	145.91	197.756	201.565	1.25103	8.61653	0.00162	0.0209
Sv2c	1.70992	1.11809	2.07263	2.95502	0.913809	0.864112	0.855972	0.919344	0.549619	1.14076	0.443108	0.00162	0.0209
Gm16630	0.85496	0.813158	0.641529	0.492504	0.948955	2.23652	1.28396	2.03224	2.05384	-1.32358	0.446106	0.00164	0.0211
Kif26b	4.11038	3.76086	4.98419	5.3081	3.19833	2.38901	2.10701	1.54837	1.01246	1.07478	1.66516	0.00164	0.0211
Snx33	4.70228	3.35428	5.32963	11.6559	3.33892	1.98237	3.39097	2.32255	1.53315	1.16359	2.02728	0.00164	0.0211
Faah	128.671	101.475	111.577	183.704	90.1859	99.322	85.3997	75.6282	76.9755	0.513788	6.70163	0.00164	0.0212
Dgkb	82.1419	108.489	114.932	143.811	81.083	63.1818	84.017	61.6929	55.4536	0.605082	6.44927	0.00165	0.0212
Gng3	364.772	271.764	256.71	242.038	355.577	586.02	330.899	499.494	539.87	-0.774047	8.59769	0.00165	0.0212
Ndufs6	137.55	105.067	101.263	70.3186	122.239	243.222	139.326	191.224	227.947	-0.89168	7.23923	0.00165	0.0212
Mrp63	43.307	40.9967	36.8633	34.9678	45.6553	74.8219	46.7163	61.0638	66.9088	-0.665711	5.66413	0.00165	0.0212
Cox8b	0.42748	0.474342	0.246742	0.601949	1.15983	1.42324	0.559674	0.967731	1.07031	-1.31258	-0.233511	0.00166	0.0212
Gm16706	2.10452	0.914803	0.986968	1.64168	0.456904	1.06743	0.16461	0.338706	0.289273	1.58222	-0.0989683	0.00166	0.0212
Ntsr2	62.8396	42.5892	49.0523	222.776	36.3415	58.2513	30.0249	34.1609	31.039	1.13856	5.88183	0.00166	0.0212
Pdzd11	72.573	62.2744	58.0831	48.7579	76.1273	120.518	71.6712	97.9344	110.763	-0.722465	6.33774	0.00166	0.0213
Pfdn4	51.0674	42.8263	37.5048	32.8336	47.3072	84.8863	49.6135	75.725	88.6332	-0.823454	5.84956	0.00167	0.0213
Lysmd2	100.524	85.9576	79.599	79.1837	107.759	151.88	100.807	129.724	153.372	-0.652506	6.79602	0.00167	0.0213
Myeov2	131.795	92.3273	92.2322	83.7256	127.547	256.895	107.095	171.482	195.086	-0.838223	7.1386	0.00167	0.0214
C230066G23Rik	0.361714	0.169408	0.0493484	2.07946	0.070293	0.15249	0.065844	0.0483866	0.0289273	2.90636	-1.45953	0.00168	0.0214
Mthfr	22.229	14.3319	13.3241	38.3058	13.426	14.8932	11.0289	9.19344	7.17397	0.862503	3.94883	0.00168	0.0214
Fam123a	67.3445	56.4467	63.9062	139.871	52.1574	49.0511	47.8686	47.4188	42.4653	0.640815	5.93731	0.00169	0.0214
Myo1d	10.8185	7.1829	10.6099	17.2924	7.76737	8.13282	4.08233	4.6935	3.5002	0.933174	3.00706	0.00169	0.0215
Cript	111.737	97.1385	93.762	74.6417	119.217	181.158	119.902	149.369	155.484	-0.680531	6.95325	0.0017	0.0216
Itgav	15.6852	20.2273	22.0587	46.7331	16.2377	10.776	15.5721	13.016	10.2403	0.847269	4.20382	0.00171	0.0216
Rgs6	1.18379	1.18586	1.48045	3.50225	0.70293	1.06743	0.625518	0.580639	0.231418	1.40649	0.235448	0.0017	0.0216
Tmem160	80.1032	65.798	68.0514	64.1897	73.175	133.429	88.5273	113.999	137.318	-0.730506	6.53649	0.0017	0.0216
Prdm15	15.6852	12.299	9.22815	17.8943	6.85357	10.8268	8.46096	6.67734	5.06228	0.779664	3.34707	0.00171	0.0216
Crtc1	103.647	113.842	136.399	163.511	111.239	78.1767	81.3503	50.1769	52.8502	0.707048	6.60796	0.00171	0.0216
Gja1	62.3792	76.8773	94.6502	713.857	80.7666	53.7274	59.3584	69.2412	46.2547	1.68652	6.97881	0.00172	0.0217
Ptprf	22.3276	29.748	30.596	52.3148	21.6502	18.0447	24.6586	15.8224	13.3644	0.73479	4.63648	0.00172	0.0217
Gcnt4	1.11802	0.880921	1.48045	5.3081	0.456904	0.711621	0.296298	1.01612	0.462837	1.71251	0.34262	0.00172	0.0217
Hcfc2	36.27	31.3405	28.9675	45.8028	24.3917	20.5862	25.3499	20.5159	21.6376	0.553865	4.81103	0.00172	0.0217
Adhfe1	9.27303	9.28356	9.67229	30.6447	7.5565	7.06538	6.97947	5.46768	5.95902	0.988788	3.29321	0.00173	0.0217
Oplah	17.1978	21.1082	24.082	57.7324	19.1548	10.2677	17.3828	11.6612	10.0667	0.97647	4.33782	0.00173	0.0217
Plxnb1	19.0722	14.6368	21.1211	91.1132	19.0143	17.8414	9.94245	8.66119	8.09964	1.34297	4.43351	0.00173	0.0217
Scn2b	174.642	157.278	147.601	183.047	206.45	259.081	184.66	251.707	269.949	-0.59324	7.68218	0.00173	0.0217
Taok2	53.7967	55.2948	63.9062	116.723	57.2185	40.2574	44.7739	28.4513	25.9767	0.765823	5.71643	0.00173	0.0217
Ttyh2	8.05635	5.18388	8.78402	22.4363	4.42846	6.86206	4.57616	4.74188	3.12415	1.08545	2.85965	0.00173	0.0217
Cep350	104.042	52.1099	68.1501	65.5577	44.8821	65.6217	20.0495	21.4352	21.8112	1.02954	5.66303	0.00175	0.0219
Gm10710	0.723428	1.08421	0.93762	1.47751	0.667783	0.355811	0.362142	0.290319	0.347127	1.24602	-0.406348	0.00175	0.0219
Orc1	0.85496	0.440461	0.394787	1.53223	0.316318	0.355811	0.16461	0.241933	0.115709	1.63067	-0.893607	0.00175	0.022
Vti1b	159.121	137.085	127.368	163.566	169.793	270.264	160.956	223.981	239.431	-0.624127	7.52678	0.00176	0.022
Rasgrp2	44.0633	40.9628	42.7851	41.425	51.6302	65.825	51.49	61.7896	67.0824	-0.573464	5.71361	0.00176	0.022
Pin1	190.557	159.176	154.757	181.187	196.363	315.147	193.878	265.062	297.315	-0.650289	7.77248	0.00176	0.022
Timm8a1	9.30591	8.19934	7.59965	5.03448	9.9816	16.9264	11.1935	14.6127	14.8976	-0.89289	3.47341	0.00177	0.022
Topors	46.3323	40.3191	45.5486	53.5187	36.0603	27.3974	32.8891	26.8545	26.3528	0.542393	5.2114	0.00177	0.0221
Tm7sf3	28.1479	27.6474	28.474	62.2196	25.6921	23.0769	21.3005	16.645	17.0671	0.691287	4.75757	0.00177	0.0221
Ndufs5	91.7438	76.8096	73.7265	54.8321	86.7415	160.521	96.8895	125.95	152.968	-0.806392	6.69773	0.00178	0.0221
Trf	16.8033	17.4829	20.5289	30.6994	9.77072	19.3663	12.247	7.74185	9.48815	0.780727	3.9694	0.00178	0.0221
Tmem11	50.5413	40.929	41.8474	41.042	51.8762	78.0242	50.4365	66.8702	78.393	-0.656945	5.81269	0.00179	0.0222
Aasdh	17.3623	12.4007	10.1164	27.8538	8.85692	10.8268	9.54738	8.85474	7.37646	0.77062	3.61648	0.00179	0.0223
Psmb10	61.7215	55.0576	52.0626	53.0262	62.8771	102.677	64.0333	88.0635	97.2536	-0.657975	6.15986	0.00179	0.0223
Plin4	0.953609	1.38915	1.13501	0.82084	0.808369	0.15249	0.098766	0.0967731	0.115709	1.99972	-0.523249	0.0018	0.0223
Ccdc104	138.799	119.873	112.218	97.6799	157.386	195.798	141.696	187.449	200.755	-0.6625	7.24988	0.0018	0.0223
Arhgef2	112.23	83.9586	89.6167	216.647	81.821	88.8002	71.9675	55.5961	57.8546	0.691996	6.52845	0.00181	0.0224
Tubgcp3	35.9741	33.7122	33.8037	49.5787	25.7975	22.0094	30.9467	21.4836	16.6043	0.61223	4.88943	0.00182	0.0224
2610001J05Rik	46.1021	38.4556	35.5308	50.6732	49.7674	82.0398	46.1237	60.6767	65.4335	-0.59918	5.72414	0.00182	0.0224
Tmem2	9.70051	7.99606	7.7477	20.0285	6.25608	7.11621	6.55148	3.33867	3.58698	0.957895	2.96185	0.00182	0.0225
Acap2	57.1179	33.9832	34.4945	87.7751	31.5264	44.273	22.8808	19.8385	22.2451	0.812264	5.24735	0.00183	0.0225
Gpc5	11.9694	13.0444	15.5941	72.1792	12.3013	12.7075	9.71199	8.03217	7.57895	1.29123	4.07565	0.00183	0.0226
1810020D17Rik	38.2101	28.1556	28.1286	30.59	36.5524	59.2679	35.9508	49.693	59.8506	-0.708273	5.36435	0.00184	0.0227
Ccdc85b	140.016	112.25	116.413	107.694	148.213	238.546	133.565	180.192	215.132	-0.690886	7.28683	0.00184	0.0227
Unc119	110.882	95.004	93.2191	81.3178	115.702	154.117	121.811	158.659	163.15	-0.659058	6.94575	0.00185	0.0227
Snrpe	32.2912	24.8691	28.4247	19.6454	33.0377	56.4722	33.5475	42.0963	54.2387	-0.797262	5.1961	0.00185	0.0227
Fan1	11.3447	4.74342	6.16855	10.3426	3.93641	6.50625	2.9959	1.7903	2.60346	1.12371	2.46273	0.00185	0.0227
Gcfc1	49.8507	24.6319	20.825	82.9048	19.5063	34.5645	14.1894	15.8708	15.5918	1.03328	4.87954	0.00185	0.0227
Dctn3	213.411	191.634	173.46	163.84	219.806	369.382	222.948	289.497	335.47	-0.700301	7.93478	0.00186	0.0227
Stat2	16.8361	16.6359	15.5941	45.3103	13.426	14.4866	12.9383	10.1128	8.18642	0.855218	4.03692	0.00186	0.0227
Atp5l	16.31	12.5362	10.4125	8.31784	13.7774	31.3113	15.4075	24.8223	27.9148	-0.984258	4.18668	0.00187	0.0228
Cox5b	319.163	242.626	238.797	178.341	298.359	536.918	313.977	438.14	508.455	-0.836735	8.43758	0.00187	0.0228
Scn1b	965.349	861.778	808.475	713.693	1106.83	1419.74	1051.23	1424.06	1399.65	-0.683435	10.0995	0.00187	0.0228
Slc26a4	7.23428	4.64178	5.57637	10.5615	2.70628	5.59131	2.6996	2.08062	3.29771	0.995976	2.27754	0.00187	0.0228
A330023F24Rik	62.0833	17.6523	15.9395	54.1207	11.7038	31.7688	7.73667	7.11282	7.14504	1.45222	4.51413	0.00188	0.0229
Ift140	22.6236	26.902	26.056	37.3208	20.4553	12.1484	19.9178	14.9031	8.35999	0.798586	4.3709	0.00188	0.0229
Txn1	100.359	84.6362	86.113	60.5232	95.3173	179.024	108.939	145.644	162.976	-0.796512	6.85069	0.00188	0.0229
Tceb2	160.141	123.566	121.693	98.1724	146.491	261.673	159.112	221.465	253.779	-0.793315	7.44524	0.00189	0.0229
Zfp609	23.906	16.7375	16.0382	32.6694	16.4837	15.9607	11.6873	8.75797	9.31459	0.742877	4.04129	0.00188	0.0229
1110008F13Rik	51.0674	43.1651	42.2422	45.1462	50.3649	78.1767	54.4201	70.8863	75.7895	-0.619536	5.84268	0.0019	0.0229
2010012O05Rik	48.2724	39.201	37.7515	33.545	49.6971	79.0408	47.7369	61.4509	61.3259	-0.652966	5.68266	0.00191	0.0229
2010111I01Rik	36.3358	21.4132	18.3083	54.8321	17.4327	27.0924	13.3005	12.6773	11.6288	0.885401	4.51075	0.0019	0.0229
Cox6a1	576.21	441.511	436.487	347.708	516.548	992.661	581.765	817.394	953.241	-0.842405	9.31826	0.0019	0.0229
Minos1	155.077	121.737	122.137	120.007	151.973	259.894	146.964	212.611	228.526	-0.696907	7.41207	0.0019	0.0229
Mocs2	127.718	96.9352	95.8346	93.6304	127.722	198.542	120.231	158.611	173.969	-0.660543	7.0636	0.00191	0.0229
Ndufb6	167.145	154.127	144.591	117.654	164.872	284.445	188.511	251.949	285.194	-0.755216	7.63147	0.00191	0.0229
Ndufb8	448.953	368.733	352.841	351.976	426.362	790.51	443.196	657.718	789.918	-0.785172	9.02414	0.00191	0.0229
Plec	723.822	390.113	629.834	558.554	474.056	289.071	78.9799	79.4023	105.209	1.45091	8.50272	0.0019	0.0229
Rpl22l1	61.59	53.8717	48.4601	30.3711	61.7524	105.981	65.1527	88.2087	111.168	-0.886238	6.1499	0.00191	0.0229
Scrib	14.4028	13.2138	15.8408	28.7294	11.4226	11.9959	10.3704	7.69346	9.45922	0.703568	3.74418	0.00191	0.0229
Vwc2	19.6312	18.1267	15.6928	11.1634	23.8293	32.023	22.2224	25.3062	28.3777	-0.756833	4.47209	0.0019	0.0229
Zfp324	10.3911	10.2661	9.72164	11.6012	7.4862	5.89629	6.74901	4.6935	3.00844	0.842656	2.95063	0.00189	0.0229
Zfp831	6.24778	3.65921	4.44136	9.41229	2.81172	4.57471	1.84363	0.822571	1.24387	1.31672	1.92344	0.0019	0.0229
Znhit3	46.8584	38.354	34.2971	38.5795	47.6235	83.463	43.49	58.3058	65.5492	-0.665494	5.67361	0.00191	0.0229
Fkbp3	301.538	295.583	267.814	232.516	348.618	459.25	350.191	444.963	471.023	-0.667026	8.48038	0.00192	0.0229
Pls1	6.51085	5.38717	6.71138	11.3823	4.74478	4.87969	3.98356	2.46771	2.57453	0.903496	2.4109	0.00191	0.0229
Commd1	34.6916	27.2747	28.2273	29.988	37.0795	54.744	34.2718	42.6286	51.2881	-0.629453	5.25388	0.00192	0.023
Apc	302.82	338.172	396.317	369.487	302.119	228.888	215.705	153.676	147.558	0.682084	8.07926	0.00192	0.023
1810030N24Rik	20.8808	15.3145	15.7915	15.1582	21.6151	35.4286	18.7326	28.5965	28.7248	-0.731714	4.49172	0.00195	0.0233
Zcchc6	43.1755	42.1487	41.6007	54.7774	37.185	29.5323	31.7039	24.8707	18.8895	0.591626	5.15343	0.00195	0.0233
Bai3	58.8607	64.1379	59.7609	78.6912	49.5917	37.3093	52.1155	34.8383	30.0265	0.590063	5.67901	0.00196	0.0233
C130039O16Rik	14.1726	12.0618	12.7812	20.5757	10.8603	6.65874	10.2717	6.38702	5.98795	0.779548	3.45354	0.00196	0.0233
Doc2a	2.69641	2.67665	2.91156	6.12894	2.00335	1.93154	1.84363	0.870958	0.896746	1.13411	1.27386	0.00196	0.0233
Hrsp12	51.6264	41.3694	41.6994	57.8966	59.8545	88.6477	49.1855	66.5799	79.579	-0.608221	5.90215	0.00196	0.0233
Lrig1	9.86492	10.2661	13.176	52.6432	12.8285	7.4212	5.8272	6.14509	5.75653	1.30851	3.68951	0.00196	0.0233
Sirt3	123.41	117.264	114.143	127.394	154.117	178.515	140.445	190.062	159.794	-0.532571	7.18963	0.00196	0.0233
Smpd4	34.1984	17.5507	16.4824	58.6079	19.5063	18.7563	14.4528	12.387	8.99639	0.963136	4.41942	0.00196	0.0233
Lhx2	20.5848	18.2961	21.7133	48.7031	16.1674	19.0105	15.4404	10.016	11.8023	0.787272	4.28812	0.00197	0.0233
Prdx5	513.469	444.628	404.41	355.369	490.54	854.352	546.999	748.927	904.354	-0.795407	9.2134	0.00197	0.0233
1700012A16Rik	2.23605	0.880921	0.888271	1.09445	0.316318	0.965772	0.230454	0.193546	0.347127	1.61884	-0.215565	0.00198	0.0235
Bad	27.7862	24.4286	23.6872	27.8538	30.2963	46.3062	29.2677	39.6286	39.6304	-0.595479	5.01484	0.00198	0.0235
H2afx	61.6887	55.7013	56.0104	51.1657	63.5097	91.5958	70.2226	93.5312	102.923	-0.667251	6.1877	0.00199	0.0235
Scaf4	27.852	29.748	31.2869	41.0967	25.3406	16.2148	24.2306	15.1934	13.2776	0.689867	4.62395	0.00198	0.0235
Bzrap1	107.297	61.3596	72.2461	244.501	57.1833	82.6497	57.4818	49.4994	47.6143	0.893609	6.36758	0.00199	0.0235
Nek10	0.690545	0.338816	0.246742	2.02474	0.070293	0.457471	0.098766	0	0.0867819	2.39478	-1.07089	0.00199	0.0235
Ptk2	49.9494	55.5997	54.8754	80.6064	49.5917	33.1921	41.4488	33.3383	25.1089	0.622721	5.53659	0.00199	0.0235
Sfswap	43.307	24.5303	24.2301	50.7279	21.5448	31.2605	16.3952	14.7095	14.4347	0.770277	4.70509	0.00199	0.0235
Zc3h3	7.85906	4.87895	6.56334	3.88531	3.62009	2.43984	2.79837	2.80642	1.30173	1.11826	2.03363	0.002	0.0235
Csf1	12.1667	8.67369	8.78402	43.9423	10.1925	5.79463	7.04531	6.29025	4.10768	1.2673	3.48248	0.002	0.0236
Ctnnbip1	54.553	47.5698	43.3772	55.9265	56.867	87.1228	56.0991	74.9992	88.7779	-0.623632	5.98469	0.00202	0.0237
Bloc1s3	28.0493	23.5477	20.1341	19.536	29.7339	42.189	26.8644	36.3383	42.2338	-0.707268	4.92062	0.00202	0.0237
Col17a1	0.164415	0.101645	0.29609	1.2039	0	0.10166	0.032922	0.0967731	0	3.06964	-1.92055	0.00203	0.0238
Akr1c18	83.3257	67.1533	63.3633	41.0967	111.801	113.91	99.0294	85.1119	105.527	-0.743043	6.44083	0.00203	0.0238
Cd59a	50.8701	56.074	44.9564	50.9468	55.2503	75.0252	64.2638	104.805	99.1049	-0.746648	6.08725	0.00204	0.0238
Cfdp1	115.387	90.8365	87.4454	82.9595	111.731	169.823	114.272	149.273	176.746	-0.692295	6.95005	0.00203	0.0238
Gm10060	2.89371	1.79572	1.13501	4.65142	0.913809	1.67739	0.757206	0.532252	0.173564	1.608	0.676316	0.00203	0.0238
Sepx1	25.7474	21.8875	20.9237	15.9243	23.3724	42.0873	28.3788	41.1286	43.1017	-0.818678	4.89407	0.00204	0.0238
Mrfap1	276.777	235.037	227.397	214.13	292.032	443.442	291.524	346.738	419.532	-0.661372	8.26822	0.00205	0.0239
Cd24a	12.0681	12.3329	12.1397	10.7804	18.6628	21.7045	14.1565	16.4998	17.9928	-0.653278	3.93936	0.00205	0.0239
Brp44	279.276	255.84	244.62	187.37	280.82	486.088	305.187	437.269	486.441	-0.788079	8.38512	0.00206	0.024
Kif13b	5.39282	4.7773	6.36594	11.4918	3.83097	4.26973	2.37038	0.532252	1.24387	1.42973	2.11929	0.00206	0.024
Cbs	13.0875	7.75888	10.6593	45.4198	8.57574	9.4544	6.38687	7.83862	4.88871	1.1933	3.5745	0.00207	0.024
Ern1	2.99236	3.35428	3.25699	6.56672	2.31967	1.42324	1.97532	1.64514	1.82242	0.990638	1.49463	0.00207	0.024
Fbrsl1	40.4462	37.4053	39.7748	78.4175	36.0252	31.2097	32.0331	23.7578	21.7822	0.640094	5.20772	0.00207	0.024
Hap1	111.967	118.179	110.935	302.561	84.703	89.8676	90.5684	75.8217	91.6706	0.740549	6.85347	0.00206	0.024
Hspe1	146.56	105.711	99.6344	80.9348	122.837	247.238	132.774	207.965	238.91	-0.876052	7.28531	0.00207	0.024
Specc1	110.388	86.8046	113.699	117.818	84.2461	87.7328	63.2761	53.6123	58.4331	0.553922	6.41615	0.00207	0.024
Stx19	1.05226	0.474342	0.29609	0.82084	0.175732	0.355811	0.098766	0.193546	0	2.00322	-1.15278	0.00207	0.024
Spata13	7.33293	4.64178	6.41529	14.6109	4.67448	5.64214	2.89714	1.4516	1.76456	1.22512	2.4053	0.00208	0.0241
Isca2	112.098	81.6885	75.5031	93.6852	109.938	176.177	94.7495	147.918	161.617	-0.689761	6.88154	0.00208	0.0241
Ndufa4	784.919	667.942	610.44	403.908	741.029	1436.51	837.305	1162.83	1387.24	-0.906258	9.82605	0.00208	0.0241
Rpl38	42.6822	32.0859	30.3493	22.9288	37.3607	77.3126	38.4858	61.1606	68.6155	-0.878608	5.53519	0.00208	0.0241
Smchd1	22.2947	21.8875	22.3548	35.1867	16.9406	17.3839	17.2511	14.7095	14.3479	0.550289	4.32284	0.00209	0.0241
Rad9b	2.49911	1.25362	1.5298	4.15892	1.05439	0.914942	0.82305	1.0645	0.867819	1.16981	0.667572	0.00209	0.0241
Usp42	22.0974	19.6852	19.3446	31.1372	18.7331	14.2833	13.926	12.2902	10.4428	0.626871	4.14976	0.00209	0.0241
Lgals1	82.7996	62.4777	58.0337	41.3703	78.5876	123.517	86.8483	101.128	113.829	-0.77567	6.40025	0.0021	0.0242
Crebbp	54.29	51.6017	60.0077	71.3583	49.8026	42.494	38.7492	27.0481	29.4191	0.579509	5.54416	0.0021	0.0242
Gm17390	6.0176	1.38915	1.08566	3.94003	0.913809	2.0332	0.296298	0.338706	0.260346	1.98533	0.85628	0.00211	0.0242
Gtf3c1	88.7514	109.709	124.703	98.2271	83.262	44.4255	77.7618	42.6286	39.7461	0.805954	6.29865	0.00211	0.0242
Pop7	29.2331	24.6319	26.6481	20.521	30.3314	51.2876	31.3418	39.2899	49.5814	-0.740762	5.09449	0.00211	0.0242
Trpt1	15.5866	11.723	11.893	11.2181	15.1833	22.5686	16.6915	22.3062	22.5054	-0.729563	4.08024	0.00211	0.0242
2310047M10Rik	23.6429	17.8217	18.2589	17.1282	22.564	35.9877	24.066	31.3545	34.8863	-0.705012	4.66902	0.00212	0.0243
A930039A15Rik	0.328831	0.338816	0.246742	1.25862	0.210879	0.10166	0.065844	0.14516	0	2.19037	-1.52076	0.00212	0.0243
Kcnk9	0.789194	0.779277	0.986968	2.62669	0.562344	0.355811	0.592596	0.338706	0.144636	1.52622	-0.27898	0.00212	0.0243
Gabarapl2	125.909	116.553	110.688	77.6514	135.736	212.267	137.252	182.224	206.599	-0.757154	7.20236	0.00212	0.0243
Gm1821	2.20317	25.6484	0.789574	0.766117	0.808369	0.813282	0.855972	1.40321	1.61993	2.70855	2.0412	0.00213	0.0244
Mtbp	1.34821	0.982566	1.23371	3.83058	0.913809	0.660791	0.724284	0.435479	0.491764	1.33801	0.250167	0.00213	0.0244
Kcnj16	5.42571	8.43652	9.08011	42.4648	6.36151	4.32056	5.36629	5.12897	5.64082	1.38377	3.2608	0.00214	0.0244
Ankhd1	48.3052	38.4217	44.4136	71.3583	37.5013	35.0728	32.5928	29.5642	28.4934	0.524644	5.32204	0.00214	0.0244
Pin4	9.53609	7.11513	7.79705	5.52699	9.41926	18.7563	9.71199	13.645	17.4432	-0.937111	3.48963	0.00214	0.0244
Steap3	1.7428	1.45691	1.97394	6.56672	1.15983	1.21992	0.888894	1.0645	0.867819	1.3166	0.877176	0.00215	0.0245
Anapc16	52.7116	45.9773	43.2785	45.6387	55.9181	86.2587	53.597	65.7089	75.992	-0.599605	5.87812	0.00215	0.0245
Kcnj10	12.6271	7.14902	11.3008	32.3411	8.5406	8.79361	5.00415	5.80639	6.65328	1.02986	3.38576	0.00216	0.0245
Ezr	21.6042	21.4132	30.7934	86.9543	24.462	15.5032	14.9795	16.8869	16.0546	1.01681	4.7201	0.00216	0.0246
Epha6	46.4309	53.0247	52.9015	85.6957	49.1699	25.4151	39.8027	27.4352	20.5962	0.764632	5.44858	0.00217	0.0246
Kif13a	18.6776	13.5188	17.568	30.3163	14.8318	12.4534	10.8972	10.3547	6.56649	0.755344	3.87655	0.00217	0.0246
Ypel5	314.329	305.239	274.575	240.998	350.375	460.47	369.714	466.688	522.919	-0.687873	8.54265	0.00217	0.0246
Pam16	29.3975	25.5806	23.934	20.6852	29.4528	50.8301	28.7738	43.3543	48.1061	-0.754086	5.08075	0.00217	0.0246
Supt4h1	38.4403	29.4431	31.6323	26.431	38.8369	60.8945	37.2677	50.7575	54.7883	-0.689031	5.37371	0.00217	0.0246
Fsd1l	26.7011	17.8556	17.9135	31.0825	16.8	17.4856	13.8931	10.3063	10.8477	0.660736	4.15381	0.00218	0.0246
Lhfpl5	22.8866	23.8865	22.5522	15.9243	28.5741	35.1236	28.3788	37.4028	38.6469	-0.72137	4.84386	0.00218	0.0246
Plcb3	8.38518	8.97862	9.86968	39.2361	8.68118	8.08199	5.59674	5.758	3.90518	1.20267	3.36449	0.00218	0.0246
Arl3	89.2776	76.8096	70.7163	76.557	92.7867	138.614	90.2063	112.692	131.677	-0.609576	6.62314	0.00218	0.0246
Mrpl20	107.626	91.9546	89.4193	71.03	104.526	188.529	107.622	156.434	169.427	-0.752867	6.9344	0.00219	0.0247
Rit2	155.603	158.905	141.038	133.195	194.255	220.857	174.651	238.013	264.887	-0.650408	7.56686	0.00219	0.0247
C1d	66.5882	69.7961	65.7321	73.1094	71.0662	122.602	82.3379	107.079	117.04	-0.624557	6.44137	0.0022	0.0248
Nap1l5	1435.35	1489.1	1190.97	1053.52	1648.05	2238.15	1729.76	2197.23	2337.87	-0.721216	10.7543	0.0022	0.0248
Scn7a	1.84145	1.55855	2.02328	4.65142	1.44101	0.559131	0.954738	1.0645	0.665328	1.26109	0.71821	0.0022	0.0248
Tmem60	45.2471	43.3346	38.9359	33.4903	46.2176	78.3292	49.2184	64.9348	72.4918	-0.693929	5.73246	0.0022	0.0248
Ntan1	62.7409	55.1253	48.3614	47.0067	68.0085	94.3407	62.0251	85.5958	77.583	-0.606576	6.07421	0.00221	0.0248
Snrpn	1999.78	1813.41	1623.61	1746.64	2204.84	3169.36	2127.62	2928.35	2992.24	-0.659021	11.174	0.00221	0.0248
Setbp1	34.8889	17.7878	20.825	27.2519	17.749	19.6713	12.7408	11.2741	10.0088	0.750149	4.24021	0.00221	0.0248
Wdhd1	6.64238	5.04836	5.62572	6.67616	3.62009	3.91392	3.55558	2.90319	2.16955	0.818343	2.16212	0.00222	0.0248
Gm11611	2.40046	0.677632	1.48045	1.25862	0.527197	0.660791	0.65844	0.435479	0.433909	1.34913	0.0256161	0.00222	0.0249
Trhr	1.57839	2.47336	2.56612	4.54198	0.843516	1.11826	1.51441	1.0645	1.2728	1.11432	0.930969	0.00223	0.0249
Dynlrb1	295.422	228.193	223.795	200.285	272.139	472.974	289.121	404.995	473.077	-0.762829	8.33099	0.00223	0.0249
Vgll3	1.41397	3.45592	2.56612	4.81559	1.01925	1.16909	1.18519	1.40321	1.47529	1.15377	1.05553	0.00224	0.025
Srp19	97.9258	71.7951	68.1995	74.0945	92.9976	162.91	86.7166	118.257	134.685	-0.682992	6.66597	0.00224	0.025
Fzd2	1.67704	2.43947	2.9609	13.6259	2.21423	0.762452	1.48149	1.35482	1.30173	1.62597	1.54468	0.00225	0.0251
Lhfpl2	10.7199	9.99507	12.0904	44.4895	10.6494	8.79361	7.57206	7.16121	4.80193	1.13633	3.60935	0.00225	0.0251
Bai2	103.417	82.129	105.655	142.06	88.7449	80.6165	68.6095	47.4672	46.8333	0.618601	6.38427	0.00226	0.0252
Zic4	2.56488	1.49079	3.70113	6.62144	0.878662	2.74483	1.15227	0.483866	0.578546	1.53548	1.12445	0.00226	0.0252
Nhp2	39.0322	33.3056	32.0765	32.2864	39.0126	66.0791	38.6504	53.6123	60.0531	-0.665129	5.46763	0.00227	0.0252
Gfer	24.1033	20.9049	19.8381	18.6604	26.5356	34.4628	27.2594	32.3706	29.7951	-0.595507	4.7172	0.00228	0.0253
Arhgef19	6.70815	4.30296	4.98419	28.8936	4.67448	4.87969	3.65434	3.14513	2.2274	1.40032	2.71467	0.00229	0.0253
BC031181	198.153	173.474	161.764	150.761	199.984	329.786	206.717	259.497	319.965	-0.693354	7.81246	0.00229	0.0253
Camk4	58.1044	65.8997	68.8904	75.8456	48.467	47.4245	49.4159	37.7899	41.9735	0.493033	5.77083	0.00229	0.0253
F3	22.3934	19.8546	23.5392	226.278	23.0561	17.638	12.4116	23.1772	15.534	1.73032	5.2603	0.00229	0.0253
Gm12758	0.887843	0.745395	0.345439	2.24363	0.316318	0.457471	0.362142	0.14516	0.289273	1.56527	-0.551429	0.00228	0.0253
Zranb3	5.35994	4.20132	4.73745	7.22339	3.16318	2.59234	3.48973	2.32255	2.2274	0.852279	1.9744	0.00228	0.0253
Rexo2	68.2982	56.2434	55.813	64.3538	71.4177	105.981	66.9963	90.8216	101.014	-0.597128	6.25259	0.00229	0.0253
Sec61b	23.2155	19.4819	20.3315	18.9888	21.7205	41.6807	24.889	34.4512	40.0932	-0.742226	4.78594	0.0023	0.0254
Arl2	166.947	136.983	124.753	122.031	159.776	240.884	172.841	219.917	245.506	-0.669597	7.48235	0.00231	0.0255
Ddo	6.51085	4.33684	4.6881	20.8493	3.93641	5.28633	2.46915	2.12901	3.03737	1.26363	2.48531	0.00231	0.0255
Rnf5	73.5594	57.7003	53.395	71.9055	72.1206	121.636	68.3461	98.4666	113.077	-0.653382	6.35093	0.00231	0.0255
2810422J05Rik	30.1538	27.4102	25.0196	23.6402	35.1465	42.7481	33.6792	38.2738	39.0808	-0.577951	5.05229	0.00232	0.0255
Gadd45gip1	63.7932	54.8543	54.0365	51.0015	63.2988	99.8812	67.2267	85.9829	100.002	-0.649916	6.16974	0.00232	0.0255
Mdga1	35.4808	20.3628	24.3781	37.7039	19.6469	24.5509	13.926	7.2096	9.86421	0.901275	4.38922	0.00232	0.0255
Rictor	91.0532	74.0652	84.8299	87.009	67.657	62.0127	58.239	47.4672	43.2174	0.524901	6.08715	0.00232	0.0255
Timm17a	175.826	148.435	140.791	157.656	173.202	275.702	179.326	248.707	277.962	-0.654254	7.63974	0.00232	0.0255
Eif2c4	12.364	7.48783	7.50096	15.2676	5.69373	7.72618	6.18934	4.83866	3.73162	0.821984	2.94969	0.00233	0.0256
Fam195b	132.289	106.896	101.016	121.977	129.48	219.637	127.606	174.772	207.611	-0.65814	7.20836	0.00233	0.0256
Jmjd1c	119.103	81.7224	80.1418	123.564	60.698	103.033	40.0332	42.6286	41.1635	0.750642	6.23129	0.00234	0.0256
Hpcal4	218.837	247.336	273.834	415.071	211.687	207.336	171.59	100.983	155.918	0.668936	7.7677	0.00234	0.0256
0610012G03Rik	74.2829	57.3954	54.7767	52.3696	72.1557	119.044	67.4901	93.2409	106.915	-0.689318	6.29155	0.00237	0.0257
2810025M15Rik	14.4686	12.1296	11.054	12.422	16.2377	26.9908	13.5968	19.6933	21.0301	-0.710118	4.04955	0.00236	0.0257
4930572J05Rik	41.1696	40.8612	40.367	30.0427	41.1565	68.6715	52.4777	70.7411	67.4006	-0.721877	5.67714	0.00235	0.0257
Adam11	116.538	100.222	111.873	211.941	90.5022	95.2556	88.4285	77.612	72.6364	0.551576	6.7118	0.00236	0.0257
BC029722	72.9675	59.5638	56.652	44.0517	77.7089	105.574	73.5478	90.5796	101.014	-0.68244	6.26333	0.00235	0.0257
Cisd3	37.0921	29.5786	32.5206	28.1274	36.9741	55.7098	37.8603	54.2897	62.9458	-0.716749	5.40486	0.00236	0.0257
Cox17	76.3874	51.6694	47.5225	65.9955	68.4654	140.952	60.6423	101.418	122.42	-0.796736	6.36111	0.00237	0.0257
Gm17296	2.66353	1.6602	1.87524	3.94003	1.15983	1.98237	0.757206	0.629025	0.549619	1.24331	0.759512	0.00237	0.0257
Gm872	6.54373	3.99803	6.2179	30.0975	4.14729	6.91289	2.76545	2.32255	2.37204	1.48884	2.74925	0.00236	0.0257
Hint1	319.295	261.498	261.547	173.307	324.226	540.121	338.833	425.076	496.132	-0.796621	8.46798	0.00235	0.0257
Nme1	276.908	256.89	237.366	216.045	278.114	433.632	319.771	400.302	485.863	-0.713021	8.35564	0.00236	0.0257
Nt5m	135.215	119.297	107.135	89.3073	136.158	207.336	141.4	189.627	200.813	-0.700501	7.22324	0.00236	0.0257
Ptges3	113.94	119.704	99.2396	105.177	124.454	163.927	144.528	172.305	187.912	-0.618775	7.11499	0.00236	0.0257
9130020K20Rik	24.3664	7.28454	5.32963	22.0532	2.60084	11.8434	1.02058	2.41933	2.60346	1.79399	3.07679	0.00238	0.0257
Gadd45a	15.7181	12.7734	11.4982	14.009	17.8193	25.1101	16.3622	17.9514	22.9104	-0.649444	4.11337	0.00238	0.0257
Sumo1	102.792	94.1569	84.1884	97.461	104.596	160.928	110.025	144.966	160.431	-0.610261	6.89241	0.00238	0.0257
Adamts3	10.0293	9.28356	8.48793	16.3621	6.81842	7.87867	6.45271	2.95158	3.32664	0.9169	2.96081	0.00239	0.0257
Bod1	141.036	114.486	112.761	97.1327	148.178	227.516	135.507	176.175	196.937	-0.667618	7.24311	0.00238	0.0257
Cox8a	572.659	403.123	423.607	260.753	529.833	1043.14	548.744	747.233	903.631	-0.910773	9.25857	0.00238	0.0257
Eml1	23.4128	22.3618	22.4042	42.8478	17.6787	21.3995	16.5598	12.145	7.3186	0.792148	4.32906	0.00239	0.0257
Iqub	1.70992	1.2875	1.4311	5.96477	0.562344	1.0166	0.592596	1.35482	0.607473	1.47611	0.653862	0.00238	0.0257
Lime1	0.953609	0.372697	0.444136	1.64168	0.351465	0.355811	0.263376	0.14516	0.173564	1.56344	-0.809958	0.00239	0.0257
Nfix	94.506	75.0477	90.7024	188.191	77.0411	90.6809	51.4571	37.7415	47.8457	0.769556	6.33666	0.00239	0.0257
Tmem126a	37.3881	29.748	29.5597	28.3463	36.6226	56.5739	37.3336	49.2575	52.7055	-0.645635	5.32896	0.00239	0.0257
Igdcc4	21.4726	24.327	25.8092	62.4385	22.1774	16.7231	18.0083	14.9031	16.1414	0.780321	4.57891	0.0024	0.0258
Ptprj	19.3024	15.5517	21.5653	26.5952	15.2887	13.6225	13.8931	7.59669	6.62435	0.782125	3.93776	0.0024	0.0258
Sh3bp4	10.4897	10.029	12.9786	33.0525	11.4226	8.23448	7.11115	5.80639	3.90518	1.04874	3.45528	0.0024	0.0258
Smyd2	127.553	120.585	111.478	98.6102	148.459	186.546	143.737	170.853	169.543	-0.583303	7.16445	0.00241	0.0258
Faim	46.4638	36.0839	34.3958	49.8523	52.0168	74.5169	42.9303	57.5316	68.3552	-0.597353	5.68776	0.00241	0.0259
Pan3	23.4128	12.2651	13.4228	35.2961	9.41926	16.9264	9.48154	7.74185	9.80635	0.864702	3.88923	0.00242	0.0259
AI837181	67.1801	57.4293	59.5635	56.4738	73.2453	92.9683	75.8852	88.5958	85.3066	-0.542244	6.20295	0.00243	0.026
Sec16a	23.5772	34.051	39.1826	43.3403	25.6921	13.775	26.4035	12.4837	12.6991	0.85198	4.6698	0.00244	0.0261
Ufc1	77.2423	66.3063	67.4099	59.7024	78.5876	131.04	78.3215	104.321	116.837	-0.657498	6.45213	0.00244	0.0261
Slc8a1	10.9829	9.92731	10.5606	21.3418	9.41926	7.52286	7.04531	5.41929	6.24829	0.762589	3.26818	0.00245	0.0261
Tm2d2	112.033	101.746	98.9929	102.988	114.859	174.144	124.478	159.676	172.522	-0.602422	7.02603	0.00245	0.0262
Arsk	3.78155	2.37171	2.91156	8.04423	2.10879	1.42324	1.67902	1.01612	2.19847	1.16408	1.48664	0.00246	0.0262
Gm10250	5.75454	4.30296	3.75048	3.22864	5.58829	10.5218	6.02473	8.2741	9.45922	-0.960873	2.69796	0.00246	0.0262
1700017B05Rik	20.0916	16.026	16.9759	23.476	12.1255	15.1982	11.9178	11.8063	9.89313	0.565339	3.92004	0.00249	0.0265
Sec61g	16.1456	16.4665	14.4097	10.6162	18.1707	29.2273	19.2923	23.661	27.452	-0.765628	4.31132	0.00248	0.0265
Tmem198b	3.94597	3.15099	3.45439	11.437	2.67113	2.08403	2.43623	2.46771	1.50422	1.13136	1.83567	0.00249	0.0265
Cdc34	50.3769	47.6714	44.611	43.7781	56.867	79.5999	53.2349	67.3057	74.0828	-0.579993	5.86	0.00249	0.0265
Kcnn3	1.18379	1.01645	1.23371	5.3081	0.948955	0.965772	0.625518	0.387092	0.376055	1.54518	0.384175	0.0025	0.0266
Mrpl13	65.9306	52.2115	51.0262	44.3801	64.6695	98.0004	63.2103	86.4668	97.3403	-0.687523	6.13339	0.0025	0.0266
Ube2m	326.069	285.046	268.406	317.939	353.152	500.067	346.57	437.608	485.921	-0.591142	8.53756	0.00251	0.0266
Cdkl4	4.37345	6.20033	4.83614	14.3921	4.67448	3.30396	2.96298	2.70965	2.77702	1.02849	2.32044	0.00252	0.0267
Dkk3	72.4743	84.8734	101.362	161.596	73.2101	72.4329	71.77	43.306	50.0442	0.649384	6.31083	0.00252	0.0267
Ralb	62.9711	60.1398	54.8754	70.1544	74.0185	83.6664	77.0704	91.3538	85.3066	-0.501661	6.20557	0.00252	0.0267
2310036O22Rik	76.0586	56.7178	58.7739	59.1004	72.8938	123.568	72.4613	90.3861	105.064	-0.639605	6.32309	0.00254	0.0268
Ptms	128.376	81.6208	89.0739	91.6057	114.578	200.474	110.75	154.789	183.197	-0.72163	7.01626	0.00254	0.0268
1700021F05Rik	60.735	52.4487	45.9434	48.2654	56.9725	91.0875	61.5642	86.3216	100.146	-0.693553	6.08737	0.00254	0.0269
Aste1	8.5496	6.64079	5.08289	9.24813	3.93641	3.96475	3.42389	5.22575	2.51667	0.861748	2.4276	0.00254	0.0269
Edf1	171.65	141.083	131.464	121.265	162.447	269.603	180.182	212.611	248.572	-0.67159	7.5243	0.00255	0.027
Rab4a	64.7797	61.6645	56.9974	60.5232	71.2068	93.4766	72.165	92.3215	103.155	-0.588552	6.24861	0.00256	0.027
Syt6	3.18966	2.91382	4.34266	3.50225	2.38996	1.77905	1.74487	0.725798	0.723182	1.1846	1.26838	0.00256	0.027
Kcnk3	23.1497	23.2089	19.3939	20.7946	41.754	29.1256	28.5434	27.5803	29.7951	-0.61108	4.77365	0.00257	0.027
BC022960	3.61714	1.89737	2.41807	7.11394	1.40586	2.38901	1.25104	1.49998	0.549619	1.29336	1.26098	0.00257	0.027
Cited2	117.195	136.712	125.345	92.8643	154.504	164.283	176.297	204.869	204.198	-0.686294	7.2839	0.00257	0.027
1110001A16Rik	35.7768	27.1392	26.9936	28.7841	38.626	62.521	30.9467	42.2415	49.0607	-0.659774	5.25758	0.00258	0.0271
B9d2	16.3429	15.7549	14.2123	15.7601	17.7138	27.1941	18.8972	24.3384	27.5388	-0.659258	4.32332	0.00258	0.0271
Higd2a	143.239	107.981	110.047	82.0292	138.372	230.311	134.585	184.304	216.694	-0.766718	7.24647	0.00259	0.0272
Cabp1	141.595	120.314	117.647	82.4123	156.332	212.876	151.968	187.982	185.684	-0.68664	7.25537	0.0026	0.0272
Yeats2	16.1785	12.1635	16.285	34.0375	12.0552	14.7916	9.44862	5.08059	4.91764	0.983981	3.74049	0.0026	0.0273
Zswim7	11.542	10.5372	9.86968	8.81034	12.723	22.3144	11.8848	17.0321	19.0342	-0.76642	3.8035	0.00261	0.0273
Dnajc9	40.9065	37.778	33.4089	35.6792	45.5499	58.7596	43.1278	53.2736	61.9623	-0.588744	5.52811	0.00261	0.0273
Hip1r	45.7404	47.6714	59.6129	65.9955	44.9172	34.9711	36.708	32.0319	27.6545	0.547675	5.44485	0.00261	0.0273
Catsperg1	0.526129	0.135526	0.394787	2.29835	0.140586	0.10166	0.230454	0.193546	0.0289273	2.3325	-1.07963	0.00262	0.0273
Eif1ad	63.6945	52.7875	53.9378	46.7879	62.8771	103.236	67.1938	79.7894	88.9803	-0.631731	6.11937	0.00262	0.0273
2700094K13Rik	11.542	8.4704	9.62294	8.42729	11.528	19.7221	11.7861	16.403	17.8771	-0.769271	3.70431	0.00262	0.0274
Vps54	30.1209	21.7181	18.7524	39.2361	19.7875	19.7729	14.9795	15.5805	10.4717	0.668925	4.37252	0.00263	0.0274
Cul9	31.2389	44.7237	46.9797	62.2744	39.1532	19.5696	30.2882	16.8385	15.0422	0.841956	5.06543	0.00264	0.0275
Mrpl14	38.4732	31.476	31.731	24.5157	35.744	60.9961	41.6793	51.3865	60.7473	-0.732177	5.41077	0.00264	0.0275
Sfrs18	263.985	114.621	117.647	429.518	95.5633	199.661	66.2391	70.0637	69.9462	1.09251	7.23156	0.00264	0.0275
Ndufa12	160.206	139.423	120.756	132.429	151.341	244.544	171.227	209.949	251.841	-0.65581	7.47314	0.00265	0.0275
Timm10	52.1197	38.9638	38.1463	25.8291	44.7766	88.851	49.5476	71.5153	85.4223	-0.867192	5.8071	0.00265	0.0275
Cbl	20.4862	22.7345	22.5522	27.2519	16.3431	10.3693	17.0536	14.4676	10.2113	0.669281	4.15994	0.00265	0.0276
Zzef1	34.8561	25.1063	27.4377	48.1012	23.0561	29.329	17.9096	12.8224	16.4886	0.673107	4.67459	0.00266	0.0276
Dyrk2	9.40456	9.72402	11.1034	15.9243	8.15399	6.45542	7.63791	5.08059	5.00442	0.730201	3.11037	0.00267	0.0277
Ascc2	22.5578	16.7375	16.6304	29.4408	14.3749	15.9607	13.8602	10.3547	10.732	0.608285	4.04236	0.00267	0.0277
Tceal1	49.1602	45.9096	42.7357	33.2166	53.5281	78.4817	53.4653	63.6283	80.5625	-0.688702	5.82029	0.00267	0.0277
C030006K11Rik	41.0381	43.0635	40.9592	34.6942	49.6268	60.132	53.9263	62.709	56.4371	-0.570655	5.63856	0.00268	0.0277
Daam1	46.9242	48.5184	50.9769	71.1942	43.898	36.9027	39.4076	25.6449	23.0261	0.597914	5.40262	0.00268	0.0277
Gm12532	0.394597	0.169408	0.197394	2.02474	0.070293	0.0508301	0.032922	0.0483866	0.231418	2.58358	-1.34861	0.00268	0.0277
Gng4	7.59599	8.94474	12.3371	11.9843	5.30712	5.59131	7.4733	2.99997	4.83086	0.873109	2.89619	0.00269	0.0277
Atp5j	511.957	432.905	408.259	316.078	512.366	837.273	528.003	698.17	786.504	-0.749715	9.14649	0.0027	0.0278
Cdkn2aipnl	59.9459	58.5813	55.6156	67.1447	74.1942	98.2546	65.3502	80.8539	85.3934	-0.506372	6.1702	0.0027	0.0278
Dpm3	15.0933	11.7569	10.4619	11.054	13.5314	26.1267	14.1235	22.403	24.5303	-0.810189	4.07262	0.0027	0.0278
Mettl11a	63.7274	62.3421	60.5998	59.6477	70.5039	101.508	72.4613	91.0635	102.229	-0.586572	6.26379	0.00269	0.0278
Zfp276	24.0046	13.1122	12.6825	38.9625	11.3875	16.2656	11.1935	9.29022	5.84331	0.922611	3.93119	0.0027	0.0278
Zfp442	3.81444	2.77829	2.76351	4.43253	2.35481	1.82988	1.61318	1.49998	1.09924	0.945591	1.31677	0.0027	0.0278
Snrpd2	26.5366	22.328	21.7133	18.934	25.2352	48.2378	26.4693	36.0964	43.362	-0.746159	4.92042	0.00271	0.0278
Fam126a	17.4609	18.7365	18.0615	39.7286	16.0268	13.6733	14.2223	12.1934	10.3849	0.691058	4.12062	0.00272	0.0279
Ndufb2	185.559	160.768	156.632	112.455	185.679	319.315	191.31	265.062	286.12	-0.754377	7.7133	0.00272	0.0279
Snrpf	14.6987	10.2661	10.5606	7.66117	13.3205	24.1443	14.0577	20.032	23.5757	-0.876248	3.97169	0.00272	0.0279
Zmiz1	24.2677	39.7092	39.7255	49.8523	30.472	15.554	24.9549	10.887	8.41784	1.00476	4.73589	0.00272	0.0279
6530402F18Rik	4.57075	2.81217	3.25699	9.1934	2.35481	3.50728	1.54733	1.74192	1.33066	1.12458	1.71121	0.00272	0.0279
Hint2	44.6223	39.4721	37.4554	39.2361	40.1724	79.5491	48.0991	64.0638	77.2937	-0.701023	5.7229	0.00272	0.0279
Rnf19a	49.3575	42.7924	40.1696	65.0652	37.7825	32.4804	36.313	25.9836	26.9602	0.527242	5.29098	0.00274	0.028
Vegfb	66.4567	55.9385	53.7898	40.9325	76.3733	91.1892	67.7535	86.3216	84.352	-0.640896	6.13323	0.00274	0.028
Bank1	0.756311	0.914803	0.888271	2.46252	0.773223	0.254151	0.460908	0.0967731	0.202491	1.62112	-0.335793	0.00274	0.028
Ndst3	11.4762	6.23421	5.32963	16.5262	6.85357	5.94712	3.2922	2.5161	2.40097	1.12589	2.70475	0.00275	0.028
Ryr3	28.2466	12.1296	13.1267	40.8778	7.90796	22.0094	5.00415	4.20963	5.23584	1.3308	3.87131	0.00275	0.0281
Pgam2	9.83204	11.5875	12.0904	10.7804	15.1833	15.0457	14.8478	19.8385	30.2579	-0.883875	3.99692	0.00276	0.0281
Pard6a	59.8801	53.1602	52.3093	44.2159	59.5733	89.9185	68.3461	80.3217	88.6332	-0.631478	6.06955	0.00276	0.0281
Trappc1	47.9435	39.2349	36.9126	37.9228	45.2687	73.9578	49.4159	58.2574	70.9876	-0.632715	5.69083	0.00276	0.0281
Rbx1	222.059	186.857	173.065	171.61	218.787	337.512	225.911	298.158	308.105	-0.633023	7.90887	0.00276	0.0281
Pomp	206.966	175.066	165.317	147.806	198.824	348.085	210.306	268.207	338.681	-0.720139	7.85562	0.00277	0.0282
6330403A02Rik	17.8226	15.3484	18.0122	19.4265	11.5983	15.5032	9.81076	6.24187	8.70711	0.702954	3.75389	0.00279	0.0283
Tmem147	103.352	88.7698	79.0561	79.1289	102.979	144.002	105.054	138.192	154.298	-0.636135	6.80695	0.0028	0.0284
D3Bwg0562e	134.097	163.953	167.143	206.523	121.853	103.185	137.91	83.0797	77.1202	0.594538	7.03684	0.00281	0.0285
G0s2	17.3294	13.7559	12.9786	12.6957	16.4134	25.4151	18.4692	23.4675	26.7867	-0.716338	4.24104	0.00281	0.0285
Pdrg1	68.2653	64.375	57.3922	73	73.3859	111.572	74.1404	91.6925	104.804	-0.559057	6.32782	0.00281	0.0285
Fam123c	21.0123	27.7151	29.3623	24.7346	19.8226	9.14942	18.14	12.0483	9.40137	0.832311	4.25423	0.00281	0.0285
Kazald1	9.86492	8.57204	7.15552	8.31784	10.79	17.1297	9.28401	15.1934	17.3853	-0.799289	3.55178	0.00281	0.0285
Krba1	27.9177	25.0724	22.947	38.9078	21.7557	16.7739	21.2018	14.9514	11.8023	0.629183	4.46258	0.00281	0.0285
Baz1b	92.796	91.3786	95.4398	98.6649	69.6603	85.1404	47.9015	50.9027	57.1314	0.540021	6.24751	0.00283	0.0285
Cav3	12.101	11.6553	9.91903	8.7009	12.8285	18.1463	14.0906	19.9836	21.6376	-0.784571	3.87519	0.00283	0.0285
Meis2	11.9366	9.85954	13.2254	26.431	10.3331	9.20025	8.59264	3.91931	4.36802	0.960859	3.39676	0.00282	0.0285
Tm2d1	52.0868	44.1816	43.0318	45.584	49.3808	81.7348	53.8933	72.3379	82.0378	-0.636499	5.88011	0.00282	0.0285
Fam96a	24.1362	19.8546	19.69	26.7594	24.1105	41.3249	25.9096	34.2093	37.0848	-0.618306	4.82243	0.00283	0.0285
Otof	1.90722	2.43947	1.72719	15.2676	1.65189	1.88071	0.296298	0.387092	1.47529	2.0027	1.46922	0.00283	0.0285
Gnl2	61.2612	54.9898	53.7404	85.8051	49.4511	39.0883	44.5764	40.1608	36.8534	0.497694	5.67691	0.00284	0.0286
4931406P16Rik	11.3775	11.6891	12.4358	35.1867	11.0009	8.9461	9.21816	5.95155	3.32664	1.06242	3.53603	0.00285	0.0286
Casp2	7.03698	4.43849	5.47767	14.5015	4.21758	4.62554	4.21402	2.32255	2.45882	1.00538	2.40968	0.00285	0.0286
Sos2	19.401	19.9563	21.0718	32.1222	17.9599	11.7418	16.1647	11.6612	10.5295	0.656046	4.13955	0.00285	0.0286
Urm1	41.2683	33.9494	31.9778	29.5502	40.2427	65.4692	40.2965	54.4349	55.0776	-0.645501	5.46112	0.00285	0.0286
3110035E14Rik	39.361	42.928	47.029	69.7166	34.9356	33.8528	35.7204	14.5644	20.7119	0.738473	5.20532	0.00285	0.0286
Gm9801	0.789194	0.237171	0.197394	1.53223	0.246025	0.20332	0.16461	0.0483866	0.0867819	1.98964	-1.18913	0.00286	0.0286
Adamtsl4	5.52436	3.11711	3.60243	10.9993	3.44436	3.25313	1.51441	2.22578	1.64886	1.13111	1.92918	0.00287	0.0287
Tomm22	103.582	83.6536	82.5599	67.3636	102.347	147.204	107.721	129.482	156.178	-0.678333	6.78832	0.00286	0.0287
Cox7a2l	78.196	66.9839	64.4984	63.533	77.4629	122.602	81.2515	100.838	108.419	-0.59487	6.42009	0.00287	0.0287
Dnttip2	52.9746	84.8056	82.1651	81.2631	64.1423	52.6092	37.5969	38.1286	38.3287	0.637829	5.87614	0.00288	0.0287
Htr1a	7.39869	8.06382	10.8073	15.3223	7.41591	3.76143	6.55148	2.61287	3.67377	0.996866	2.84716	0.00288	0.0287
1700011J10Rik	11.3118	8.0977	8.04379	8.15367	11.7389	18.8071	10.6997	14.3708	15.4472	-0.741867	3.58722	0.00288	0.0287
1810014F10Rik	35.448	24.4625	26.1053	30.1522	31.5264	55.2523	32.8232	47.6124	53.3998	-0.689668	5.24029	0.00288	0.0287
Rab26	47.9106	23.4122	24.9703	85.3126	19.4712	36.7502	17.5145	18.0482	17.0671	0.931149	4.9459	0.00288	0.0287
Tbata	6.0176	3.69309	5.18158	8.37256	2.81172	4.11724	3.16051	2.5161	2.40097	0.852916	2.07563	0.00288	0.0287
Dnm2	30.647	29.6125	31.8791	91.8246	30.4369	25.72	24.3952	17.4675	11.3974	0.930756	4.96051	0.0029	0.0288
Isca1	179.279	162.293	154.066	136.095	203.006	254.659	191.441	243.82	248.254	-0.601438	7.6389	0.0029	0.0288
Ppp1r11	109.665	91.7513	80.3885	85.8598	104.315	167.892	106.47	140.805	180.738	-0.68856	6.90849	0.0029	0.0288
Rfx4	4.73516	3.76086	6.0205	29.3313	4.5339	3.76143	3.22636	3.82254	1.93813	1.45658	2.65587	0.00289	0.0288
Rgs11	45.4444	18.0589	22.0094	141.513	22.318	31.0572	16.8561	18.8708	10.5874	1.32981	5.06879	0.00289	0.0288
1500011B03Rik	106.771	81.6546	77.2302	91.2774	105.264	178.109	93.9594	130.789	149.843	-0.638754	6.82504	0.00291	0.0288
Atp2b4	6.6095	7.08125	8.78402	17.5112	3.58494	8.64112	2.93006	1.98385	4.07875	1.13445	2.71576	0.0029	0.0288
Mpp5	57.2823	46.0112	50.4834	53.0262	40.1021	36.6485	34.0414	32.419	30.8654	0.492808	5.39895	0.00291	0.0288
Lrch4	2.49911	0.84704	0.986968	6.2931	0.527197	1.62656	0.49383	0.629025	0.376055	1.71996	0.608394	0.00292	0.0288
Mrpl17	93.1249	86.7369	82.5599	63.6424	93.2788	142.985	106.141	139.063	147.674	-0.692654	6.75263	0.00291	0.0288
Pom121	105.357	75.5221	105.803	39.7286	59.9951	33.497	48.4941	31.79	29.3323	0.973225	5.89491	0.00291	0.0288
Pyroxd2	1.41397	0.609869	0.888271	4.43253	0.808369	0.864112	0.263376	0.193546	0.173564	1.83857	0.0711169	0.00292	0.0288
Caskin2	10.8514	10.1645	12.7319	42.6289	11.2469	7.31953	8.36219	7.79023	3.78948	1.14017	3.59726	0.00292	0.0288
Cerkl	2.99236	1.59243	1.77654	4.26837	1.37071	1.82988	0.757206	0.870958	0.723182	1.16222	0.847747	0.00292	0.0288
Ndufb10	280.953	245.066	222.709	235.8	259.908	468.349	299.031	387.818	475.42	-0.700051	8.33537	0.00292	0.0288
Ndufs4	148.27	131.63	122.976	80.5517	149.548	251.05	156.742	210.046	235.989	-0.785067	7.39121	0.00293	0.0289
Pfdn2	86.351	74.3023	68.3969	87.5015	93.3139	148.881	84.1487	105.579	125.458	-0.577834	6.60648	0.00293	0.0289
Rnaseh2c	33.5079	24.3609	21.4666	22.9288	30.6829	54.1341	29.3664	39.7254	45.6473	-0.71119	5.08204	0.00293	0.0289
Smad3	18.283	18.1267	19.4926	27.5802	16.8703	12.9108	13.8931	9.96763	8.59141	0.651429	3.99894	0.00293	0.0289
Acaca	14.3699	11.3165	14.8539	27.8538	11.2469	11.9959	9.1194	7.88701	8.04179	0.704835	3.66248	0.00294	0.0289
Cdc123	94.5388	91.2431	83.1027	94.8891	112.715	143.239	100.61	126.095	133.21	-0.519758	6.77578	0.00294	0.0289
Gm12906	1.08514	0.609869	0.789574	0.547226	1.44101	1.88071	1.61318	1.35482	1.53315	-1.08755	0.382673	0.00294	0.0289
Fgfr2	25.6488	26.2921	26.056	83.1784	25.7975	24.3476	19.1606	15.0482	13.133	0.898542	4.77702	0.00295	0.0289
Nudt18	56.5918	57.1582	49.8912	49.7976	66.8135	84.9371	63.8358	74.225	78.6244	-0.538279	6.02857	0.00295	0.0289
Pmvk	51.5278	43.2329	41.502	42.0817	48.7482	81.5823	50.9962	70.7411	79.955	-0.652469	5.84201	0.00295	0.0289
Syt10	3.55137	2.47336	3.84918	8.91979	3.23348	2.13486	1.44857	0.677412	0.838891	1.3667	1.55007	0.00295	0.0289
Enc1	37.3223	29.2737	47.0784	106.709	24.2511	44.6797	18.568	9.09667	21.1169	1.10812	5.15912	0.00296	0.029
Mrpl27	73.9869	64.104	62.7712	57.0757	73.9482	125.855	76.2803	91.9344	114.234	-0.649173	6.37678	0.00296	0.029
Chchd2	245.669	203.933	193.396	145.672	222.653	413.503	254.355	335.464	414.702	-0.797521	8.09896	0.00297	0.029
Rpl36al	40.1174	30.6967	32.3726	21.0682	38.38	64.6051	39.3418	52.8865	67.227	-0.815063	5.45225	0.00297	0.029
Trappc4	105.094	90.1928	86.7545	79.2384	98.7968	169.925	107.918	145.595	164.481	-0.676676	6.88104	0.00297	0.029
Ptpru	17.428	16.2632	15.4954	25.7744	12.2661	13.9274	11.0947	3.9677	5.12013	0.937946	3.71946	0.00298	0.029
Sep15	282.696	247.573	243.633	262.614	291.013	455.59	297.352	396.576	436.889	-0.61732	8.35092	0.00297	0.029
Lsmd1	44.0304	32.2892	32.6686	25.0082	38.6611	73.8561	40.8233	57.9187	64.9996	-0.780323	5.53081	0.00298	0.029
Nr2c2ap	9.17438	6.70855	5.97116	6.40255	10.3682	13.9783	9.61323	10.4999	11.4263	-0.727086	3.24756	0.00298	0.029
Resp18	90.0667	79.9267	67.4099	53.7376	103.788	132.616	85.4326	111.87	134.743	-0.70475	6.59921	0.00298	0.029
Gm17270	1.15091	0.64375	0.542832	5.96477	0.667783	0.660791	0.296298	0.532252	0.231418	1.89934	0.180642	0.00299	0.029
Gm17289	4.01174	1.89737	1.28306	9.13868	0.632637	2.84649	0.888894	0.919344	0.75211	1.62523	1.24367	0.00299	0.029
Macf1	631.289	540.987	891.479	1076.78	666.061	372.432	102.025	91.8377	125.544	1.46976	8.91715	0.00299	0.029
Prkcq	4.80093	3.62533	5.62572	5.69115	1.93306	4.47305	2.04116	0.870958	1.30173	1.17702	1.74687	0.00299	0.029
Tceal3	84.7397	64.8155	62.327	57.3493	82.2779	123.924	78.9799	101.321	122.767	-0.668686	6.45245	0.00299	0.029
Tctex1d2	22.8209	19.1431	17.6174	15.6507	23.7942	35.8352	22.2882	29.6126	32.8035	-0.68279	4.62895	0.00299	0.029
Arntl2	6.6095	3.69309	2.9609	8.04423	2.67113	3.55811	1.84363	2.32255	2.11169	0.984584	1.89333	0.003	0.029
Mob2	59.8801	58.0053	53.1482	53.8471	62.7716	87.1228	67.4901	93.386	92.3938	-0.601974	6.14301	0.003	0.0291
3830406C13Rik	36.9935	37.7102	32.8167	34.0922	42.949	53.7782	43.8521	53.9994	48.8293	-0.534931	5.43334	0.00301	0.0291
Col16a1	9.1415	4.2352	4.78679	32.8336	4.32302	7.11621	2.37038	3.72576	2.80595	1.46477	2.8747	0.00301	0.0291
Rpl34	26.0434	20.5661	20.677	17.2376	24.5323	47.3228	24.4611	34.5964	40.2668	-0.756769	4.84709	0.00301	0.0291
Znhit2-ps	28.0164	24.8691	22.5522	25.3366	31.9833	45.188	28.7409	32.7577	38.4444	-0.566344	4.95919	0.00302	0.0292
Dynlt3	368.455	374.866	335.717	278.921	436.027	514.807	465.649	555.236	538.655	-0.634006	8.76819	0.00303	0.0292
Helq	20.7163	10.3339	8.98141	22.491	9.5247	11.3859	7.01239	6.38702	6.50864	0.835363	3.48905	0.00303	0.0292
Rnf7	100.458	73.252	76.8355	77.8703	90.1859	165.249	91.2927	132.918	145.157	-0.680876	6.73929	0.00303	0.0292
Chchd4	82.405	70.6431	61.3894	75.1889	83.0512	125.703	79.77	106.789	119.585	-0.592646	6.49307	0.00304	0.0293
Slc7a11	5.98472	4.87895	6.71138	35.4603	5.16653	6.35376	2.63376	4.01608	3.35557	1.42286	2.93838	0.00304	0.0293
Slc13a3	2.49911	2.74441	3.30634	10.6162	2.77657	1.37241	2.13993	0.822571	0.954601	1.39212	1.54353	0.00305	0.0293
Dnahc7b	2.86083	1.55855	1.92459	10.9445	1.33557	2.694	0.82305	0.774185	0.694255	1.61493	1.29987	0.00305	0.0294
Cetn3	60.3404	54.9221	50.3354	65.0105	67.9733	116.909	61.6958	76.112	80.1286	-0.559373	6.13686	0.00306	0.0294
Rnpc3	59.3868	19.9563	25.7599	80.3328	17.7138	40.6641	11.5227	15.9676	11.8313	1.14707	4.90413	0.00306	0.0294
Timm9	62.0175	45.8418	46.5849	31.575	63.1582	91.3417	59.8851	74.2734	82.8767	-0.729785	5.97458	0.00307	0.0294
Fam131c	35.3822	32.6957	30.0038	22.2174	39.5047	43.8155	41.8439	57.8219	51.722	-0.710459	5.33118	0.00307	0.0294
Slmo2	107.33	97.274	85.5701	100.142	112.363	154.981	114.437	140.563	152.273	-0.551892	6.89839	0.00307	0.0294
Exoc6	17.165	21.8197	23.4405	23.8043	16.1322	12.7584	16.0989	9.24183	8.50462	0.706233	4.04207	0.00308	0.0295
Oaz2	228.735	212.878	201.786	204.17	259.241	323.839	253.401	317.271	338.999	-0.575477	8.03782	0.00309	0.0296
Trrap	53.2048	35.9145	46.1901	112.564	35.5682	52.05	25.6133	24.2417	26.5553	0.79568	5.45847	0.00311	0.0297
2010204K13Rik	12.4298	7.92829	9.47489	6.67616	12.4419	17.1806	12.0495	17.5159	18.1085	-0.82404	3.69318	0.00314	0.0298
Atp5h	412.748	356.197	326.637	255.445	381.445	715.891	411.525	604.251	722.488	-0.812101	8.8841	0.00313	0.0298
Cd38	5.39282	5.72599	6.06985	40.8778	5.37741	5.43882	4.1811	4.45156	3.12415	1.46388	3.04283	0.00313	0.0298
D10Bwg1379e	35.5795	52.3471	49.7432	48.3201	38.3448	24.4493	33.4817	17.8546	16.5175	0.76449	5.12908	0.00313	0.0298
Mrpl34	66.8513	53.5668	56.0598	36.7189	62.0687	112.08	66.7329	96.2408	106.828	-0.792649	6.21418	0.00313	0.0298
Mrps25	72.5072	60.7497	58.6259	53.6829	69.7306	102.778	73.1527	103.305	121.437	-0.695651	6.33719	0.00313	0.0298
Mrps6	75.1707	66.4079	63.1166	40.9873	72.2612	119.857	81.4161	112.644	122.999	-0.787017	6.41685	0.00313	0.0298
Paip2	417.615	376.628	337.247	356.025	440.315	610.775	457.023	562.107	583.116	-0.591162	8.85895	0.00312	0.0298
Ralgapa2	17.6911	12.4007	11.3008	26.7046	9.59499	12.8092	9.44862	8.17733	8.53355	0.693448	3.66382	0.00312	0.0298
Slc7a2	5.39282	4.37073	6.90878	40.9873	6.57239	5.28633	2.89714	3.53222	2.14062	1.60797	2.98685	0.00314	0.0298
Tecpr2	35.448	45.4013	45.2031	42.5195	30.3314	22.7211	34.8315	19.8385	18.7738	0.662933	5.03277	0.00313	0.0298
Tmem14a	46.3651	39.9803	37.11	28.6199	45.1281	74.6186	47.0785	60.9671	74.3431	-0.730713	5.6803	0.00312	0.0298
Arpc5l	129.888	105.473	105.161	120.226	129.62	214.757	127.178	166.305	182.3	-0.590041	7.16059	0.00314	0.0298
Phip	140.016	73.1165	85.6688	98.0082	66.3917	90.2234	24.5927	25.0158	29.6794	1.0371	6.10542	0.00314	0.0298
Taf12	35.8754	30.9339	30.2999	31.958	39.2938	48.0853	38.0908	48.9188	49.4657	-0.555194	5.30948	0.00315	0.0298
Syt9	2.66353	2.91382	1.5298	4.37781	0.667783	1.98237	1.51441	0.338706	0.809964	1.34065	0.907877	0.00315	0.0298
Scand1	23.9389	17.6523	19.7887	19.5907	23.1264	42.5448	23.3746	28.79	38.8494	-0.70559	4.73845	0.00316	0.0299
Ostc	57.644	52.5503	52.5067	52.8621	56.1992	85.1404	67.3584	87.0958	94.0426	-0.618026	6.09059	0.00316	0.0299
Mrps11	87.4032	72.676	67.8541	62.0555	85.4763	124.534	87.7701	115.063	119.846	-0.626039	6.53181	0.00317	0.0299
Sdhd	246.952	242.592	222.857	218.343	265.251	378.481	288.528	361.448	379.526	-0.601752	8.19242	0.00317	0.03
Vstm2l	142.088	133.46	122.581	103.207	157.245	205.862	154.141	202.304	199.02	-0.618815	7.32022	0.00318	0.03
1700049G17Rik	7.66176	5.65823	7.35291	14.3921	5.62344	4.93052	4.74077	4.3064	3.03737	0.830635	2.65195	0.00319	0.0301
Rell2	75.3351	75.7592	69.5812	63.4235	97.4964	103.744	90.9964	102.676	91.2656	-0.521347	6.43339	0.00319	0.0301
Gramd3	7.26716	6.30198	6.26725	28.8388	5.9749	6.30293	4.04941	4.16124	3.61591	1.1569	2.9322	0.0032	0.0301
Hipk1	51.758	48.5184	58.6752	84.437	50.5758	41.6299	38.7492	27.1449	32.3696	0.575052	5.56753	0.0032	0.0301
Hook1	58.8936	36.4905	34.7906	105.56	32.3348	46.4587	29.4981	24.9675	25.5139	0.764139	5.39878	0.0032	0.0301
Myl12b	409.131	343.288	322.196	268.798	417.821	584.953	429.731	541.978	584.649	-0.675369	8.77975	0.00319	0.0301
Tsc22d3	193.78	185.265	178.493	223.323	222.829	292.273	222.783	296.61	323.494	-0.574089	7.90428	0.0032	0.0301
Sf3b5	59.1567	45.8418	45.894	36.0622	55.6017	96.0181	57.5806	70.8863	87.7075	-0.714874	5.96481	0.0032	0.0301
Acss3	0.230182	0.440461	0.0986968	1.86057	0.210879	0.15249	0.065844	0	0.0578546	2.47703	-1.38404	0.00322	0.0302
Coq7	74.809	65.6625	59.909	56.9663	72.3666	113.453	75.984	101.612	122.391	-0.67137	6.38774	0.00322	0.0302
Tmc7	9.99646	7.08125	8.88271	23.6949	8.22428	6.40459	6.38687	3.9677	3.55806	0.97996	3.06635	0.00322	0.0302
Dusp26	69.0216	64.951	59.7609	67.3636	80.3097	94.3915	74.4037	94.4505	99.7992	-0.528396	6.30406	0.00323	0.0303
AW146020	13.2519	4.03191	5.87246	14.9393	3.37406	8.08199	2.40331	2.66126	2.63238	1.22896	2.62026	0.00324	0.0303
Egfem1	7.59599	4.30296	4.24396	15.3771	3.33892	5.54048	3.09467	2.90319	2.19847	1.07482	2.37644	0.00324	0.0303
Mrpl41	117.294	101.001	103.681	105.451	112.574	216.18	120.89	160.014	190.949	-0.65938	7.10358	0.00324	0.0303
Mrpl46	68.4626	60.7836	56.1585	54.1754	66.8838	106.743	71.77	89.128	104.717	-0.626549	6.25372	0.00324	0.0303
Mustn1	1.80857	2.16842	3.01025	2.57196	2.95231	5.64214	3.32512	5.37091	5.55404	-1.02178	1.89504	0.00324	0.0303
Prodh	10.7528	5.86152	7.7477	41.3703	7.38076	8.28531	3.55558	5.17736	4.62837	1.31127	3.29406	0.00325	0.0303
Rin2	16.3758	15.0095	16.8772	34.4205	15.8159	14.3849	9.67907	8.66119	7.6368	0.766508	3.90603	0.00325	0.0303
Rps25	40.8079	32.4586	35.6295	29.2219	40.7699	68.1123	41.7451	49.1607	61.4705	-0.662366	5.48879	0.00325	0.0303
Cox16	8.91131	7.79277	7.79705	8.09895	9.48955	18.0955	10.963	12.4837	12.323	-0.701397	3.4293	0.00326	0.0304
Trp53inp1	6.57662	5.11612	8.04379	15.0487	6.11549	4.06641	3.81895	3.43545	3.55806	0.912648	2.60057	0.00327	0.0304
Mrpl28	107.791	98.3921	89.8141	99.431	105.826	165.909	113.318	161.224	170.208	-0.620638	6.964	0.00327	0.0304
Aqp4	37.0921	34.5253	44.2655	356.682	45.7607	31.413	26.2718	38.806	23.2575	1.58771	6.00212	0.00328	0.0305
Ankrd11	2118.85	960.204	1844.74	672.158	997.071	764.891	183.343	139.595	173.737	1.64751	9.76384	0.00329	0.0306
Tekt2	0.723428	0.101645	0.690878	2.46252	0.210879	0.254151	0.16461	0.193546	0.260346	1.95503	-0.774204	0.00329	0.0306
Dnlz	70.7315	59.1911	55.1715	57.7324	81.8562	91.24	69.63	87.87	84.0916	-0.525965	6.2034	0.0033	0.0306
9830144P21Rik	5.49147	2.16842	1.57915	12.422	1.9682	3.35479	0.855972	0.580639	0.6364	1.74193	1.60265	0.0033	0.0306
Lcorl	14.1068	15.0773	12.7319	24.6252	9.84102	11.2843	10.4692	10.7418	7.89715	0.616953	3.67542	0.00331	0.0307
Rbm8a	65.4702	55.803	53.9378	68.458	69.1331	104.1	68.9058	78.483	103.357	-0.568528	6.22204	0.00331	0.0307
Tmem181b-ps	20.4533	7.92829	8.98141	36.0075	7.27532	10.0135	6.51856	9.7257	6.71113	1.03083	3.59647	0.00331	0.0307
Wdr33	86.7784	61.8	73.5291	72.9453	52.8955	60.5387	45.169	42.8705	45.7919	0.506506	5.90676	0.00332	0.0307
Trmt112	22.6893	17.2457	19.3939	15.7054	23.1264	35.3778	22.5845	29.1287	33.816	-0.685699	4.62679	0.00333	0.0307
4930422G04Rik	3.25542	1.93125	1.67785	5.69115	1.05439	2.43984	0.790128	1.0645	0.838891	1.23964	1.0349	0.00334	0.0308
Ankfn1	0.295948	0.271053	0.592181	1.97001	0.140586	0.355811	0.131688	0	0.173564	2.06921	-1.10343	0.00334	0.0308
Birc6	50.0809	42.9957	43.624	76.4475	38.4503	47.6786	27.6216	27.4836	27.3363	0.565292	5.37509	0.00333	0.0308
5031434O11Rik	14.1726	6.23421	8.38923	31.3013	6.18578	10.8268	4.54324	5.51607	4.22338	1.12291	3.2679	0.00335	0.0308
Kdm5c	38.1115	44.7915	42.1929	60.7969	30.7883	24.7543	38.5846	20.7094	26.3817	0.61183	5.16983	0.00335	0.0308
Mrpl33	38.0128	28.2572	26.352	33.6544	35.2871	70.7555	34.1401	47.4188	49.4367	-0.660937	5.33895	0.00334	0.0308
Psmg3	33.2119	27.4102	24.8716	18.9888	30.4017	55.4048	32.3623	43.8866	54.8172	-0.792083	5.18291	0.00334	0.0308
Tmem41a	57.4796	52.1438	46.9303	33.5997	57.6754	84.683	62.3214	80.4668	95.7783	-0.744153	6.01529	0.00335	0.0308
Nkx6-2	7.66176	5.04836	7.89574	11.1634	3.83097	7.11621	3.55558	2.95158	2.71917	0.900706	2.5032	0.00336	0.0309
Lmo2	47.8778	38.2523	38.4424	66.7069	52.2628	82.5481	52.1155	71.1282	73.9382	-0.585477	5.86136	0.00336	0.0309
Lsm3	17.4938	13.5526	13.3734	14.3373	17.4678	32.2771	15.3087	24.29	26.8735	-0.734569	4.2962	0.00336	0.0309
Boc	4.20903	3.21875	4.19461	11.4918	2.95231	2.38901	3.22636	2.17739	1.38851	1.09577	1.92712	0.00338	0.031
Gdf10	4.04462	4.09967	4.29331	10.8351	3.23348	2.23652	3.35804	1.69353	2.34311	1.0171	1.97792	0.00339	0.031
Mrps14	105.39	87.6178	83.991	81.482	97.5667	173.534	104.066	138.821	155.368	-0.65055	6.84947	0.00338	0.031
Mrps16	37.5525	28.4267	31.8791	26.9235	34.9356	57.743	39.0126	47.9027	55.2801	-0.660533	5.33962	0.00339	0.031
Mysm1	64.8783	37.2697	34.7906	94.9985	35.0411	45.5438	28.5434	27.8223	26.671	0.706515	5.41207	0.00337	0.031
Sdhc	183.06	167.883	153.177	160.775	182.516	265.841	200.758	269.126	317.477	-0.659566	7.74219	0.00338	0.031
Selk	162.048	141.557	134.573	174.948	153.731	288.156	174.059	233.997	293.178	-0.672076	7.61906	0.00337	0.031
Tmem218	23.5114	21.1082	22.5029	24.2421	24.8134	41.5282	25.6462	35.3222	37.2005	-0.608786	4.84227	0.00338	0.031
Gm16750	7.72752	5.75987	9.91903	4.5967	5.83432	2.38901	0.888894	0.629025	0.723182	1.73055	2.11268	0.00339	0.031
Trp63	0.953609	0.711513	0.838923	2.95502	0.386611	0.914942	0.362142	0.338706	0.260346	1.46175	-0.202235	0.0034	0.031
5031439G07Rik	91.678	63.799	82.017	175.55	64.2478	91.3417	49.4489	41.0802	38.5022	0.752463	6.22274	0.00341	0.0311
Cygb	532.706	498.771	448.528	278.374	625.115	713.146	626.111	813.717	866.777	-0.790011	9.25989	0.00342	0.0312
Ptch2	0.591895	0.440461	0.29609	1.31334	0.140586	0.10166	0.098766	0.435479	0.0867819	1.79666	-1.18187	0.00342	0.0312
Col6a3	1.77569	1.15197	1.5298	5.74588	0.246025	1.47407	0.724284	0	0.202491	2.15559	0.460197	0.00342	0.0312
Atf7ip	23.5114	28.054	29.5103	43.1214	23.4779	15.9607	23.21	14.4676	9.92206	0.735737	4.52935	0.00344	0.0313
Dut	45.7404	37.3036	36.1724	37.8681	44.0737	66.6891	45.9262	58.3058	67.7477	-0.606676	5.62716	0.00344	0.0313
Col9a3	11.7064	5.5227	10.4125	37.5397	4.56904	12.1992	4.83954	4.83866	3.09522	1.32202	3.29781	0.00344	0.0313
Nhlrc2	12.923	10.2661	9.62294	23.5307	8.5406	9.30191	7.60498	6.96766	6.91362	0.711924	3.3767	0.00346	0.0314
Ogfod2	55.7039	42.9619	42.1435	44.0517	55.7775	80.8199	50.667	68.3218	75.1242	-0.593684	5.85352	0.00346	0.0314
Polr2d	25.4844	22.2941	22.0587	25.2819	27.2385	39.6983	28.0496	32.9512	36.2459	-0.548837	4.86041	0.00347	0.0315
Emx2	5.55724	4.09967	6.36594	15.9243	4.11214	5.2355	3.12759	2.27417	2.77702	1.048	2.40425	0.00347	0.0315
Sstr3	8.7469	9.79178	10.8566	8.81034	7.16988	4.93052	6.15642	3.77415	4.16553	0.798209	2.85065	0.00347	0.0315
Rpl23	61.0639	47.0954	50.7795	35.7886	57.2185	102.067	61.7617	75.5314	90.3399	-0.724813	6.03369	0.00348	0.0315
D030056L22Rik	35.3164	33.6783	28.8688	24.7346	35.744	52.8633	38.5188	50.7575	55.4825	-0.675413	5.32938	0.00349	0.0316
Htatip2	16.4744	14.0609	13.8176	12.4768	18.1707	26.5841	16.8231	21.532	23.6336	-0.65381	4.20363	0.00349	0.0316
Rpl35	24.6952	19.9224	20.5289	18.6057	21.9666	45.4421	24.7574	34.0641	39.5147	-0.730447	4.81063	0.00349	0.0316
Eid2	94.506	83.9586	84.3858	69.443	98.4102	137.597	101.959	127.74	158.059	-0.660389	6.75382	0.0035	0.0316
Polg	58.7621	61.0207	55.665	91.4415	49.3105	44.578	50.8316	41.3705	33.816	0.497641	5.73675	0.0035	0.0316
Supt6h	63.5301	64.9849	79.0561	119.897	65.97	51.6434	53.169	36.9189	45.2134	0.584511	5.98524	0.0035	0.0316
6030422M02Rik	6.93833	2.2023	2.22068	3.77586	1.44101	2.694	1.44857	1.25805	0.983528	1.22297	1.36706	0.0035	0.0316
Sgsh	2.40046	2.2023	2.46742	5.3081	1.15983	1.62656	1.58026	1.25805	1.50422	0.971522	1.11868	0.00352	0.0317
Gm15920	22.1303	20.1595	17.1732	17.4018	21.1582	35.3269	24.494	29.8061	32.5721	-0.648765	4.63176	0.00352	0.0318
2810006K23Rik	18.0528	15.7549	14.7552	10.9993	21.8963	23.941	19.3252	23.7578	27.6256	-0.711346	4.32049	0.00354	0.0318
Bhlhe22	23.8731	21.5826	21.4172	38.8531	15.8159	22.0603	14.1894	5.758	11.6577	0.836752	4.24578	0.00354	0.0318
Gm9786	5.62301	4.06579	3.99722	5.36282	6.67783	11.8434	5.46505	7.79023	7.89715	-0.809701	2.72233	0.00355	0.0319
Lpcat3	8.91131	6.70855	8.14249	29.1672	6.99415	6.96372	5.36629	5.22575	4.39695	1.02352	3.1156	0.00355	0.0319
1110004E09Rik	40.3804	34.8642	31.1388	40.8778	40.8402	62.9785	40.2307	53.9994	61.0944	-0.584056	5.50752	0.00356	0.0319
1700123O20Rik	38.3417	31.3744	29.1649	38.087	39.6804	54.9982	36.9714	51.7252	57.4207	-0.58602	5.40399	0.00356	0.0319
2310030N02Rik	20.8808	18.2622	16.3837	17.3471	21.0879	31.6672	22.1565	27.6287	30.2001	-0.619525	4.53199	0.00356	0.0319
Ccdc88c	17.0992	7.89441	8.78402	35.7886	7.41591	13.0633	4.08233	2.32255	5.00442	1.32087	3.41053	0.00356	0.0319
Cox4i1	955.253	800.215	781.136	601.292	898.907	1686.54	954.607	1334.31	1599.3	-0.785009	10.0805	0.00356	0.0319
Gabpb2	17.3294	6.60691	6.56334	20.5757	5.76402	10.3185	4.08233	4.54834	3.182	1.0997	3.08113	0.00356	0.0319
Slc16a2	16.6717	16.1615	17.4693	67.1994	16.9055	13.8258	13.3334	11.516	7.02933	1.05872	4.24066	0.00356	0.0319
Araf	364.739	334.072	293.82	367.517	408.578	559.639	379.426	491.753	510.769	-0.553066	8.695	0.00357	0.0319
Ints7	19.7298	15.6872	15.7421	30.59	14.867	11.6909	14.2223	10.2579	8.56248	0.662275	3.94694	0.00359	0.0321
Ano6	31.3047	32.2892	27.339	65.1747	30.3666	19.6713	25.745	16.5966	12.7569	0.767605	4.81825	0.0036	0.0322
Hras1	157.707	123.803	130.625	110.649	157.421	233.412	158.783	197.127	209.867	-0.61643	7.37613	0.0036	0.0322
Tnc	2.07163	3.04934	2.86221	16.4715	2.56569	1.42324	1.41565	2.46771	1.12816	1.54086	1.79872	0.0036	0.0322
Gm16517	63.4315	67.4582	61.5375	58.6627	72.7532	101.66	76.8729	86.7087	103.878	-0.569168	6.28336	0.00361	0.0322
Taf2	32.1596	36.2872	31.0401	51.5487	26.9222	23.8393	28.6421	21.6288	20.9723	0.522764	4.90589	0.00362	0.0323
Fam65b	63.6288	72.5744	77.7237	59.0457	52.3683	35.5811	53.0044	35.4673	32.4564	0.644108	5.74666	0.00363	0.0323
Pdzd2	23.3799	14.7046	22.2068	26.9235	11.3875	20.0779	6.15642	3.04835	2.97951	1.29316	3.81812	0.00363	0.0323
Wwc2	34.4615	34.2882	39.2813	63.3141	35.3925	26.7366	27.3911	22.6449	19.902	0.588299	5.04859	0.00363	0.0323
Atp5g1	411.302	330.515	332.855	246.58	384.046	617.84	439.97	568.252	605.246	-0.726245	8.79428	0.00364	0.0323
Cisd1	260.006	207.05	199.269	156.89	237.59	404.557	257.779	340.835	410.999	-0.748135	8.12486	0.00364	0.0323
Rgs12	24.2348	23.8188	26.4014	76.2286	23.4779	27.0416	16.2964	13.016	11.6577	0.906663	4.68079	0.00364	0.0323
Pan2	15.2577	10.4355	12.3864	52.479	11.6686	12.0467	10.0083	7.83862	6.0458	1.07658	3.85509	0.00365	0.0324
Ndufb3	156.721	136.983	126.727	80.1687	150.919	277.075	156.775	219.191	271.772	-0.834653	7.47733	0.00365	0.0324
Pcsk1n	979.455	845.38	856.54	499.235	1036.4	1669.92	1048.43	1389.61	1620.94	-0.817968	10.1345	0.00365	0.0324
Stard10	19.0393	17.2118	17.9135	19.5907	23.0912	31.2605	21.3993	24.8707	25.9189	-0.535335	4.48661	0.00366	0.0324
Yaf2	165.731	160.836	144.887	160.556	198.753	234.683	180.643	227.175	229.336	-0.520753	7.57502	0.00366	0.0324
Ermn	18.5461	18.3977	27.7831	35.6792	12.2661	24.2968	12.3128	10.645	11.4552	0.741425	4.21921	0.00366	0.0324
Etv1	22.5907	24.7336	25.4144	37.9775	16.8	17.2314	20.1153	15.4837	17.8771	0.548167	4.44741	0.00366	0.0324
2810428I15Rik	54.3886	40.3869	38.245	40.4948	49.416	84.7338	47.6711	66.338	77.9301	-0.663399	5.80897	0.00368	0.0324
Ap3b1	48.371	34.8303	39.5774	52.6979	34.4787	32.023	29.6298	27.1449	22.1004	0.505989	5.14088	0.00367	0.0324
Lyrm5	34.8561	32.4247	31.6817	31.6844	38.4503	56.5739	35.2924	50.0317	52.1559	-0.585427	5.34907	0.00367	0.0324
Mrpl36	59.7486	49.8059	48.4601	34.2016	56.867	92.3075	61.7617	79.112	91.4392	-0.726314	6.01799	0.00367	0.0324
Mrps28	30.4497	26.1566	25.0196	19.919	27.5548	54.9982	32.2306	40.2576	46.949	-0.72855	5.0951	0.00368	0.0324
Cspg4	6.57662	6.91184	7.55031	18.9888	6.15064	7.01455	3.39097	3.2419	3.5002	0.975999	2.76295	0.00369	0.0325
Ptpro	11.9037	17.178	13.6695	15.7601	9.55985	5.94712	11.9178	4.01608	4.28124	0.956365	3.38514	0.00368	0.0325
Naca	99.2411	85.9915	83.004	67.4183	97.1098	148.017	104.132	133.305	149.091	-0.65752	6.76841	0.00369	0.0325
Morn2	14.633	11.8586	11.6956	7.98951	14.6209	25.2117	14.7161	20.5643	21.5219	-0.794136	4.01422	0.0037	0.0325
Txn2	211.109	174.592	162.899	166.466	205.15	289.935	217.384	280.836	289.794	-0.600341	7.80993	0.0037	0.0325
A130066N16Rik	0.263065	0.135526	0.29609	2.29835	0	0.15249	0.098766	0.193546	0.0578546	2.63842	-1.30019	0.00372	0.0326
Col19a1	27.7862	26.1905	24.7729	115.903	22.564	23.636	24.2964	16.1611	17.7035	1.03218	4.96769	0.00373	0.0326
Fbn1	4.30768	2.77829	2.56612	8.37256	1.58159	3.81226	1.41565	0.919344	0.925673	1.28473	1.52112	0.00373	0.0326
Haus5	4.93246	3.79474	4.04657	13.8448	2.67113	4.37139	2.46915	2.70965	2.19847	1.05778	2.13315	0.00372	0.0326
Irak2	10.0293	8.33487	8.04379	30.0975	7.87281	7.11621	4.87246	7.01605	4.97549	0.98223	3.23136	0.00372	0.0326
Itpka	83.523	58.2425	78.0198	71.0847	58.308	56.2181	40.7574	19.6449	29.5926	0.778071	5.76722	0.00372	0.0326
March8	40.1174	42.4198	45.746	52.0412	35.2168	30.7522	31.1442	29.3222	26.4106	0.473245	5.20291	0.00372	0.0326
Prkd1	7.92482	4.16744	4.78679	13.9543	4.9908	4.11724	2.40331	2.27417	0.838891	1.28642	2.28276	0.00373	0.0326
Rhbdl2	1.18379	0.474342	0.246742	1.97001	0.175732	0.660791	0.16461	0.0483866	0.0867819	2.00422	-0.75616	0.00374	0.0327
Chchd6	87.4361	84.2296	77.9211	71.5225	88.2177	135.818	101.038	118.595	134.02	-0.597933	6.65915	0.00376	0.0328
Ephx4	68.8243	61.3934	56.9974	53.5735	78.2712	102.473	70.7823	77.854	92.4805	-0.555053	6.21562	0.00376	0.0328
Ulk4	6.47797	4.74342	5.03354	20.3021	4.21758	4.77803	3.19343	4.35479	2.42989	1.10139	2.55579	0.00376	0.0328
Zfyve26	9.73339	5.42105	6.46464	11.054	4.95566	6.55708	3.5885	3.09674	3.29771	0.840467	2.56962	0.00376	0.0328
Yeats4	30.1209	25.479	25.7105	19.3171	32.5457	46.7637	31.4076	36.0964	44.3745	-0.664019	5.04054	0.00377	0.0329
Cetn2	46.9899	47.6036	44.0681	53.2998	50.9273	79.8033	54.2884	68.5154	79.6368	-0.563688	5.87796	0.00377	0.0329
Trip12	106.245	108.523	153.622	116.176	113.629	79.0408	52.8069	35.4673	35.3491	0.895248	6.46124	0.00378	0.0329
Hivep3	31.4691	26.2244	32.4219	53.7376	29.9448	23.1277	22.4857	14.4676	14.7529	0.673699	4.75626	0.00378	0.0329
Acsf2	2.532	2.47336	2.9609	9.30285	2.10879	1.62656	1.48149	2.12901	1.15709	1.17215	1.4742	0.00379	0.033
Snhg11	1600.09	567.517	582.657	3128.93	458.978	1174.12	299.689	425.269	355.603	1.3047	9.79823	0.0038	0.033
Txlna	45.3786	46.3839	42.637	79.6214	37.3256	32.4296	38.815	34.5964	27.1338	0.534205	5.39171	0.00381	0.0331
Agxt2l2	9.99646	7.38619	7.20487	15.9243	6.43181	7.01455	5.5309	4.6935	4.07875	0.75527	2.89453	0.00382	0.0331
BC003965	70.8301	61.4612	56.7013	65.6124	67.9382	102.219	74.7988	98.3699	100.146	-0.564297	6.29015	0.00383	0.0331
Cyb5d2	29.5619	33.5767	29.4116	31.0277	38.3448	40.2574	40.955	48.7253	43.2752	-0.537798	5.23672	0.00382	0.0331
Gm16286	215.877	188.043	188.116	212.871	243.319	346.356	219.952	278.368	287.219	-0.530376	7.92609	0.00382	0.0331
Llph	13.2519	11.3842	11.5969	9.85007	14.0937	22.3652	13.7614	18.0966	22.7369	-0.730009	3.9555	0.00382	0.0331
Maf	59.4197	58.073	49.151	38.0322	77.3926	75.7877	70.2226	69.7734	86.4347	-0.633238	6.04478	0.00382	0.0331
Plagl1	12.5285	15.2467	15.9889	13.3523	7.24018	4.01558	10.3704	6.67734	8.27321	0.869362	3.3966	0.00381	0.0331
Ppil3	18.5789	18.025	17.3706	15.3223	21.9666	29.634	20.9384	25.3062	28.0884	-0.608449	4.45935	0.00381	0.0331
Slc8a2	4.63651	2.98158	3.84918	3.17391	1.82762	2.84649	1.9424	1.11289	1.18602	0.997579	1.41459	0.00381	0.0331
Cuedc2	178.95	162.259	146.022	144.304	191.162	249.322	181.17	247.739	292.166	-0.638878	7.65834	0.00383	0.0331
Dand5	23.8731	18.6349	19.2952	20.0832	27.0277	30.5489	24.9549	30.4835	28.0595	-0.5408	4.64582	0.00384	0.0332
Zfp518a	10.4897	12.2651	15.1006	15.9243	8.89206	11.5384	7.50622	5.37091	5.43833	0.730269	3.34772	0.00384	0.0332
Ano2	1.01938	1.38915	2.71416	2.68141	0.351465	1.16909	1.08643	0.14516	0.433909	1.52993	0.320677	0.00385	0.0332
Elovl2	5.29418	4.20132	5.67507	29.9333	4.74478	4.67637	4.08233	2.41933	3.06629	1.36159	2.72827	0.00385	0.0332
Fam193b	68.8572	29.2059	30.7441	108.57	25.2	47.9836	23.5063	25.4513	21.1458	0.923845	5.33702	0.00385	0.0332
Hmga1	44.2277	42.0471	39.2813	23.8591	51.9465	63.7918	50.3048	64.4509	64.9707	-0.714924	5.65474	0.00386	0.0332
Rai12	78.4919	65.5948	62.4257	64.901	75.6001	118.841	78.1568	103.16	102.894	-0.571169	6.39262	0.00386	0.0332
Nudt1	5.65589	4.7773	5.03354	5.41754	6.57239	10.4202	6.48564	8.22571	11.3974	-0.810336	2.8621	0.00386	0.0332
Ephb1	13.9753	9.28356	13.9656	31.575	8.92721	14.6899	6.81486	4.93543	5.35155	0.968934	3.54463	0.00387	0.0332
Glo1	82.1748	86.2625	80.4379	86.4618	99.6403	122.806	99.5232	113.708	128.264	-0.512515	6.65588	0.00387	0.0332
Myst3	402.226	138.576	221.377	76.6664	145.893	101.152	27.8849	18.532	18.7738	1.76732	6.99576	0.00386	0.0332
Nt5c	55.6053	44.5543	39.6268	48.539	50.9273	86.2587	52.4777	69.4831	81.6328	-0.617756	5.88934	0.00387	0.0332
Ubl5	129.79	96.6981	94.6502	59.0457	115.808	218.315	122.766	166.159	192.598	-0.828185	7.07605	0.00387	0.0332
C4b	15.4222	11.6891	13.1267	101.729	17.3272	15.1982	5.89304	7.45153	6.30615	1.55751	4.29189	0.00388	0.0332
Ethe1	48.2724	42.8602	40.7618	36.6094	43.4762	68.8748	56.56	68.4186	76.8598	-0.65399	5.76794	0.00388	0.0332
Ripk1	4.40633	2.64276	3.70113	11.1634	3.90126	2.49068	1.3498	1.0645	0.983528	1.34429	1.76125	0.00388	0.0332
Nfia	40.2818	28.3589	34.3465	141.403	30.5072	39.9525	21.3005	18.8224	21.9558	1.03671	5.29879	0.00389	0.0333
Nudt2	29.2988	26.4276	23.934	14.6109	30.0502	46.3571	30.5845	43.9834	46.8622	-0.799915	5.04998	0.00389	0.0333
Atp1b2	83.4573	79.0458	98.302	634.4	85.7574	84.1238	67.1938	79.0636	56.9	1.35764	7.01184	0.00391	0.0333
Cdk13	380.194	171.644	253.749	92.3171	158.335	148.475	45.3995	43.0156	49.726	1.34234	7.22061	0.00392	0.0333
Dcaf6	22.1303	17.6184	20.1835	24.6799	13.6017	15.2999	16.1318	12.6289	10.2692	0.554283	4.0735	0.00391	0.0333
Icosl	5.42571	3.89638	5.23093	16.7451	5.20168	3.15147	2.76545	2.08062	2.5456	1.14285	2.32725	0.00391	0.0333
Mrpl40	47.3187	38.9638	37.6035	33.7091	47.5181	66.8416	46.1237	60.8219	65.0864	-0.609999	5.64296	0.00392	0.0333
Nek9	33.0146	25.6822	25.9079	40.057	22.318	25.2626	20.5763	18.9191	15.5918	0.511973	4.63932	0.00392	0.0333
Pik3r5	1.11802	1.25362	0.986968	1.14918	0.773223	0.508301	0.49383	0.241933	0.376055	1.14485	-0.251956	0.00391	0.0333
Psmg4	10.8185	8.53816	7.05682	7.98951	10.2276	23.3818	9.34985	15.0482	15.8232	-0.838697	3.60239	0.0039	0.0333
Rabgap1l	74.8748	68.8135	72.6408	81.7556	58.8352	60.9961	52.0826	35.419	42.176	0.505002	5.91512	0.0039	0.0333
Upf3a	36.007	28.6299	27.9312	37.9228	37.185	57.8955	35.457	44.2253	51.1724	-0.560815	5.31376	0.00391	0.0333
Fus	177.174	109.641	110.639	255.007	101.855	117.977	95.836	87.2893	94.4476	0.590062	6.96167	0.00392	0.0333
Ccdc126	26.3722	33.2717	28.8195	27.1424	35.1816	39.19	39.6381	47.9995	43.362	-0.586198	5.17842	0.00393	0.0334
Sh3rf1	31.502	32.9329	35.1854	46.2406	31.421	23.026	25.4816	16.7901	16.691	0.594739	4.83156	0.00394	0.0335
Slc17a7	426.724	389.096	482.479	458.685	319.587	316.875	322.504	134.66	189.011	0.713872	8.38478	0.00395	0.0335
Zfp263	37.0263	20.8033	18.0615	46.5142	15.605	25.5167	14.7161	14.7095	15.3604	0.723352	4.4945	0.00395	0.0335
Atp1a2	171.419	138.44	179.529	767.43	161.99	171.704	94.5849	116.612	103.27	1.09341	7.62819	0.00396	0.0336
Csmd2	12.5613	8.40263	7.55031	21.6702	5.27197	11.6401	4.34571	4.35479	3.99197	0.984442	3.09388	0.00396	0.0336
Slc25a39	138.273	118.857	116.364	127.175	146.28	194.222	142.882	183.095	191.499	-0.5388	7.24997	0.00397	0.0336
Hs3st3b1	0.164415	0.169408	0.197394	1.53223	0.0351465	0	0.197532	0	0.0289273	2.82865	-1.73343	0.00397	0.0336
Sec1	5.12976	0.64375	1.03632	10.0142	0.948955	2.08403	0.625518	0.774185	0.838891	1.82646	1.21554	0.00398	0.0336
Sun1	46.2994	45.2319	50.8782	85.422	43.0545	37.2585	40.5928	31.4513	28.4066	0.542934	5.47754	0.00398	0.0336
Trim36	6.24778	4.98059	4.54005	7.0045	3.16318	4.82886	2.86421	2.08062	2.19847	0.841784	2.06915	0.00398	0.0336
Rps19bp1	29.4961	22.7684	21.812	19.919	27.836	48.7969	27.1277	34.9351	42.8702	-0.692584	4.95356	0.00399	0.0337
1810022K09Rik	12.923	10.6049	10.2645	7.38756	13.5665	22.2128	13.07	17.5159	17.5878	-0.754888	3.8215	0.00403	0.0338
Atp2c2	1.11802	0.813158	0.888271	1.80585	0.632637	0.660791	0.526752	0.14516	0.289273	1.23732	-0.297807	0.00402	0.0338
B430212C06Rik	3.97885	2.2023	3.1583	4.76087	1.79247	2.49068	1.87655	1.16128	1.2728	0.945273	1.34031	0.00402	0.0338
Btbd17	5.98472	4.91283	6.95812	30.973	3.97155	7.01455	3.95064	3.43545	3.87626	1.26728	2.88383	0.00401	0.0338
Camta1	367.962	378.423	416.797	364.289	322.715	234.581	264.923	196.691	198.904	0.581197	8.24952	0.00401	0.0338
Chrac1	20.7163	17.1102	14.0149	21.8891	22.9155	32.1246	19.8849	27.6771	26.5842	-0.577999	4.50145	0.00403	0.0338
Dctpp1	8.155	5.72599	6.06985	6.84033	9.41926	16.3165	7.177	10.5967	11.137	-0.772518	3.19218	0.00404	0.0338
Dmxl1	34.593	29.0704	31.2869	43.5045	24.4268	29.2273	24.066	18.0966	19.5548	0.497182	4.80042	0.00405	0.0338
Egr3	4.4721	4.50625	7.649	9.46702	5.02595	2.694	3.35804	1.64514	1.56207	1.08905	2.15009	0.004	0.0338
Gm11613	6.64238	6.36974	5.47767	4.15892	9.70043	9.70855	8.46096	9.29022	8.96746	-0.758306	2.96883	0.00401	0.0338
Gna12	81.7802	78.5714	101.214	124.768	82.2428	71.1621	62.4531	48.9672	39.2543	0.58446	6.23816	0.00405	0.0338
Gna13	21.5384	21.8197	27.2897	78.6364	20.9473	20.0779	18.996	15.5321	16.5464	0.852905	4.6825	0.00403	0.0338
Gpx3	13.9095	11.147	8.24118	15.2129	19.9281	22.0094	11.8519	16.645	21.7822	-0.70554	3.97771	0.00402	0.0338
Mmp14	4.83381	3.65921	4.73745	28.6199	4.21758	3.15147	3.42389	3.48383	2.66131	1.3985	2.6016	0.00404	0.0338
Nab2	15.0933	9.7579	12.1891	25.8291	9.20838	12.4534	8.39511	5.90316	6.79791	0.764971	3.51304	0.00401	0.0338
Ncan	65.8977	55.9046	66.571	258.4	53.2118	68.7223	43.8192	44.0318	43.6513	0.964906	6.19704	0.00405	0.0338
Rab3d	11.6077	6.91184	7.89574	20.5757	8.68118	7.52286	4.04941	3.19351	3.182	1.02692	2.98156	0.00405	0.0338
Rabac1	232.911	212.2	220.883	173.307	234.849	379.142	261.763	334.883	385.543	-0.673825	8.10021	0.00403	0.0338
Sap130	12.0681	11.6891	13.6695	19.3171	9.87616	6.2521	11.1276	4.74188	4.33909	0.862773	3.35259	0.00403	0.0338
Sbds	91.119	85.4494	73.8746	85.9145	104.139	128.092	92.6425	116.224	135.64	-0.541551	6.67786	0.00401	0.0338
Ttll4	11.1802	6.77632	7.45161	15.6507	5.65858	8.64112	4.60908	2.5161	3.73162	0.936959	2.84262	0.00405	0.0338
Zfp760	7.23428	5.04836	5.62572	12.3673	5.09624	5.33716	2.86421	2.66126	1.64886	1.00699	2.37343	0.00403	0.0338
Pebp1	361.747	343.051	322.689	215.552	376.595	575.905	428.249	507.091	593.443	-0.733718	8.7171	0.00406	0.0338
Zap70	2.36758	2.575	2.46742	6.18366	1.23013	2.59234	1.38272	1.11289	1.24387	1.04861	1.21335	0.00406	0.0338
Rpl39	14.7974	10.3339	10.2151	5.69115	12.7933	26.4317	14.2882	19.4514	23.5179	-0.954106	3.96476	0.00407	0.0339
Rdh14	51.4291	52.0421	47.7693	48.3201	54.8637	77.4142	62.486	70.6444	78.5954	-0.543083	5.93225	0.00409	0.034
Ssr2	86.4825	77.1484	65.8308	68.6769	88.7097	123.263	87.5725	106.596	116.635	-0.562676	6.52521	0.00409	0.034
Arl4c	52.9418	51.5678	48.164	36.6642	64.0369	72.8904	62.5518	67.6444	72.81	-0.584698	5.89901	0.0041	0.034
Eny2	68.7914	61.4612	57.4415	57.4588	75.108	97.3396	74.8976	79.3539	90.1664	-0.517525	6.21354	0.0041	0.034
Rps24	27.0957	22.3618	24.2301	17.0735	26.7816	45.2896	27.6545	37.1125	42.0892	-0.716051	4.92825	0.0041	0.034
Sdr39u1	89.8695	89.5152	82.5599	77.4873	99.9566	134.7	101.828	127.644	123.086	-0.54043	6.70041	0.0041	0.034
Snx3	255.173	209.354	206.671	221.298	253.758	379.193	251.886	338.125	371.918	-0.597621	8.12324	0.0041	0.034
Gm561	34.593	24.1237	24.4768	13.5165	32.5105	58.7088	30.5845	44.1285	50.0731	-0.879413	5.14389	0.00411	0.0341
Eid1	111.342	100.73	93.8607	70.5922	119.322	166.875	116.149	143.127	166.534	-0.658731	6.9394	0.00411	0.0341
Fam150b	36.1056	36.4905	30.0038	20.521	37.7122	49.1527	41.9097	63.4832	62.5119	-0.792672	5.42614	0.00411	0.0341
Mrpl21	50.048	42.7924	42.1435	34.53	47.6235	79.0916	50.9633	65.5154	78.4219	-0.668941	5.79069	0.00412	0.0341
Mrpl52	24.5637	17.4151	19.8874	11.6012	21.1933	42.4431	24.1318	33.677	38.9361	-0.854585	4.72677	0.00413	0.0341
Prkrip1	33.8696	28.1556	28.1779	23.5855	31.1749	53.9816	34.4364	46.4995	51.6063	-0.681293	5.22366	0.00413	0.0341
Tbc1d1	19.5983	12.7734	13.5708	32.943	13.8126	13.1142	11.3252	5.85477	6.59542	0.844095	3.80258	0.00413	0.0341
Zfc3h1	126.403	59.4961	71.9006	115.465	67.7273	81.379	26.5681	27.1449	24.8485	0.976847	6.01913	0.00413	0.0341
Dennd2c	0.460363	0.64375	0.493484	1.64168	0.421758	0.406641	0.065844	0.0967731	0.0867819	1.78446	-0.940875	0.00414	0.0342
Samd10	56.4931	53.6684	49.003	38.3606	65.6536	73.4495	65.844	78.6765	71.624	-0.588312	5.96174	0.00414	0.0342
0610010O12Rik	67.6076	55.3286	53.4443	70.428	65.1616	112.182	65.9757	89.6119	105.7	-0.599923	6.25905	0.00416	0.0342
Arhgap4	3.38696	1.86349	1.72719	7.66117	1.79247	2.38901	0.691362	0.870958	0.607473	1.40175	1.17065	0.00415	0.0342
Chst15	11.2131	12.6378	13.9656	22.4363	11.528	8.18365	9.67907	4.54834	3.96304	0.891607	3.41718	0.00416	0.0342
Rapgef3	21.1767	23.7849	24.7235	66.5427	22.2126	18.3497	19.0289	16.9837	11.1949	0.809724	4.58191	0.00415	0.0342
Rbm34	31.1732	30.9	28.2766	31.3013	36.3766	46.8145	33.6463	45.7737	45.9076	-0.538429	5.21137	0.00415	0.0342
Atp6v1g2	1191.95	1057.92	972.657	861.061	1282.64	1620.82	1299.04	1628.16	1757.59	-0.645517	10.3607	0.00417	0.0342
Gm2464	2.49911	1.76184	1.87524	7.98951	1.40586	2.28735	1.11935	0.580639	0.781037	1.367	1.11735	0.00417	0.0342
Inppl1	10.0622	9.21579	8.83336	23.3118	9.5247	5.03218	7.44037	4.25802	3.23986	0.985076	3.12363	0.00417	0.0342
1600029O15Rik	2.59776	0.779277	1.57915	1.91529	0.386611	1.11826	0.625518	0.387092	0.781037	1.29528	0.245556	0.00418	0.0343
Agbl5	7.76041	7.65724	7.59965	16.6904	6.85357	5.28633	5.86012	4.35479	3.76055	0.797376	2.84074	0.00419	0.0343
Zfp931	31.5349	30.4934	22.947	24.0232	33.2134	44.3747	35.457	42.2898	38.3287	-0.57541	5.08801	0.00419	0.0343
Surf1	57.7427	47.1632	47.6706	56.6927	59.8545	92.7141	55.0785	73.2572	78.8269	-0.542434	5.98915	0.00419	0.0344
Gabarap	161.423	124.379	123.618	99.431	148.107	240.426	159.375	198.433	229.972	-0.682673	7.38546	0.00419	0.0344
1300014I06Rik	42.1561	39.9803	35.1854	33.928	48.6076	51.8975	48.4283	57.4832	55.1933	-0.544608	5.53892	0.00421	0.0344
Slk	76.1572	70.4737	81.6716	130.787	68.149	67.8074	55.5724	46.4027	54.9619	0.507437	6.15295	0.00421	0.0344
Chrd	41.7615	18.7704	19.2952	90.3471	18.8034	29.6848	14.4528	17.3224	13.8562	1.02298	4.79501	0.00422	0.0345
Dad1	175.464	141.659	143.209	105.286	158.159	277.787	175.672	238.159	292.918	-0.757559	7.5921	0.00422	0.0345
Mtx2	112.427	108.929	90.653	76.2834	114.121	156.252	127.309	158.901	172.06	-0.655646	6.97872	0.00423	0.0345
Ndufc2	319.591	270.646	252.96	185.893	286.128	519.738	333.994	434.124	533.072	-0.774234	8.46825	0.00423	0.0345
Npas1	7.92482	7.08125	6.66203	11.1087	4.81507	6.40459	5.20168	2.99997	2.89273	0.792241	2.59651	0.00425	0.0347
Tmbim1	21.4398	13.2138	16.6798	66.1597	13.2151	21.1453	9.41569	10.887	8.88068	1.05306	4.24332	0.00425	0.0347
Rps21	39.657	29.6464	30.9908	21.2871	36.9038	69.5864	36.8397	46.4511	61.7019	-0.779418	5.39441	0.00427	0.0348
0610009D07Rik	86.2852	78.2326	77.6744	52.2601	84.1056	142.985	91.8524	126.434	142.12	-0.733291	6.63866	0.00427	0.0348
Abcc1	11.4433	9.58849	10.1658	17.1829	8.82177	6.81123	8.39511	5.27413	4.71515	0.722758	3.17576	0.00428	0.0348
Adam17	9.79916	6.84408	7.59965	26.048	6.60754	6.81123	6.05765	5.90316	3.35557	0.974651	3.07198	0.00427	0.0348
Aes	705.441	603.804	583.89	559.922	801.586	973.549	739.165	882.184	925.471	-0.568728	9.56953	0.00428	0.0348
Itgb4	3.15678	2.77829	4.5894	7.55172	3.09289	2.59234	1.74487	1.30644	1.38851	1.04169	1.62713	0.00428	0.0348
Mt3	230.313	145.25	161.863	137.627	194.184	384.174	193.153	269.174	336.54	-0.771116	7.84826	0.0043	0.0348
Ovgp1	2.59776	1.11809	1.33241	5.36282	0.492051	1.88071	0.49383	0.919344	0.491764	1.49109	0.671791	0.00429	0.0348
Smpd3	26.6682	33.9832	34.1984	31.8486	25.7975	13.0125	24.0001	13.4515	10.0378	0.804687	4.56162	0.00429	0.0348
Tmed9	196.805	174.253	138.027	163.073	198.613	303.71	189.17	240.965	269.284	-0.592818	7.71205	0.0043	0.0348
Ttc33	67.9364	70.4059	66.0775	70.9205	77.6035	100.949	83.1281	96.2408	108.738	-0.525355	6.37998	0.0043	0.0348
Ppil1	23.347	20.3967	17.6174	22.3268	23.6536	36.801	22.9796	32.8061	32.225	-0.58818	4.70081	0.00431	0.0349
Tmcc3	33.3106	25.75	31.0895	58.0607	23.7239	30.9555	22.0577	19.1611	19.0631	0.577689	4.8352	0.00431	0.0349
Rab11b	211.011	223.415	198.529	183.43	256.148	290.037	262.487	314.464	305.733	-0.560926	7.98061	0.00432	0.035
Nkiras1	190.294	184.892	167.39	136.861	198.683	285.818	212.512	269.803	322.539	-0.673206	7.79624	0.00434	0.0351
Dtd1	76.8149	73.0826	70.4202	71.9603	85.4411	106.794	89.2845	99.4827	114.321	-0.521624	6.46661	0.00435	0.0351
Gar1	23.8402	19.2786	20.0848	26.2669	28.6444	41.1724	23.9014	26.8545	34.1921	-0.555742	4.76695	0.00435	0.0351
4933424B01Rik	23.1497	12.875	13.9162	24.2421	11.6335	13.0633	10.3704	11.8547	8.90961	0.633489	3.83379	0.00436	0.0351
Ctnnal1	11.9694	5.65823	5.62572	25.3913	4.67448	9.30191	4.1811	2.22578	3.182	1.23616	2.92445	0.00436	0.0351
Rwdd1	50.5742	43.3684	44.0188	42.3553	50.7867	82.0906	52.9715	59.8058	72.9257	-0.570838	5.80537	0.00436	0.0351
Ube2r2	72.4743	65.8997	58.3792	59.9213	74.1591	107.048	75.4572	89.8054	100.985	-0.554521	6.30364	0.00436	0.0351
Cep110	18.8091	8.0977	10.1658	29.9333	6.46695	15.6557	3.25928	4.3064	3.87626	1.23057	3.41025	0.00437	0.0352
Gabrg1	9.89781	14.5352	14.2617	36.4453	9.27867	7.16704	9.94245	11.5644	7.57895	0.882004	3.70008	0.00437	0.0352
Ikzf2	2.56488	1.86349	1.33241	7.66117	0.948955	1.88071	0.921816	1.01612	1.2728	1.29578	1.06819	0.00437	0.0352
Leprotl1	81.4843	81.7563	75.8485	60.1949	97.3558	105.523	96.9224	120.579	119.441	-0.599179	6.56608	0.00437	0.0352
Kctd16	1.5455	2.37171	2.27003	6.2931	1.65189	1.0166	1.61318	1.0645	0.549619	1.24433	1.00872	0.00438	0.0352
Trappc2l	40.5777	31.9503	33.853	30.2069	36.6578	66.7908	41.0208	50.0801	62.5119	-0.660635	5.46808	0.00438	0.0352
Dopey2	37.3881	48.5184	59.0207	59.0457	40.7699	26.8891	38.7492	18.2417	15.91	0.785583	5.24378	0.00439	0.0353
Ndufb7	139.885	123.397	116.956	114.261	122.872	237.529	144.396	203.417	246.518	-0.705938	7.34951	0.00439	0.0353
2310022B05Rik	20.8808	26.4954	29.0169	108.132	22.9507	17.638	20.2141	20.6127	18.8027	1.00699	4.90632	0.0044	0.0353
Vstm2b	67.772	51.805	48.1147	54.6132	81.0127	80.5149	61.8605	72.6282	85.5091	-0.540113	6.08149	0.0044	0.0353
Wbp4	94.21	88.9053	81.9183	86.6259	104.596	141.918	98.766	120.628	132.024	-0.521398	6.7326	0.0044	0.0353
Enpp2	52.9089	54.3122	63.0673	101.51	45.7959	52.8633	49.0867	38.9028	31.82	0.532547	5.73788	0.00442	0.0353
Foxo6	15.5208	16.9069	18.6537	25.8291	13.2854	12.4025	11.8519	5.99993	11.8313	0.692138	3.86222	0.00442	0.0353
Slc15a2	7.79329	4.70954	5.77376	37.5945	6.0452	5.48965	3.62142	3.53222	4.71515	1.35659	3.03118	0.00442	0.0353
1110002E22Rik	4.0775	1.86349	2.51677	3.94003	2.28452	1.47407	1.28396	0.967731	1.01246	1.04302	1.13049	0.00442	0.0354
Camta2	326.266	323.874	366.412	310.66	295.687	147.458	234.767	135.047	110.647	0.781619	7.96036	0.00442	0.0354
2810002N01Rik	36.566	26.9359	29.0662	32.3411	36.8687	51.5926	35.2265	43.4027	49.7549	-0.558044	5.25932	0.00443	0.0354
Ccdc164	6.51085	5.79375	7.10617	16.6357	5.9749	5.13384	4.21402	3.5806	3.44235	0.872879	2.6575	0.00443	0.0354
Pcsk2	59.9459	73.5908	72.9369	76.5022	57.4294	52.965	52.0168	30.1932	31.7043	0.590877	5.80458	0.00443	0.0354
9430020K01Rik	78.196	42.2842	61.3894	197.713	66.0051	60.2337	21.6627	30.5319	21.6665	1.10925	5.92528	0.00444	0.0354
2610018G03Rik	8.9442	2.575	3.60243	9.24813	1.89791	4.82886	2.10701	1.35482	2.08276	1.21853	1.99371	0.00445	0.0354
Ndufa13	224.295	176.083	169.462	142.388	197.418	360.436	211.689	292.448	343.83	-0.72519	7.89731	0.00445	0.0354
Ube2a	95.1965	89.9556	82.8066	70.8111	98.129	130.481	107.227	135.773	143.682	-0.612066	6.74978	0.00445	0.0354
4933417D19Rik	1.61127	1.2875	0.986968	2.07946	0.492051	1.16909	0.65844	0.483866	0.549619	1.07381	0.11426	0.00445	0.0354
BC002230	10.5884	13.2477	13.4228	18.4415	10.7197	7.2687	9.48154	6.53218	6.364	0.683991	3.40529	0.00446	0.0355
Ppap2b	78.5906	85.9237	112.613	671.83	101.398	77.6684	61.7288	81.8217	70.2065	1.36121	7.09595	0.00446	0.0355
Dhx33	42.6494	44.8592	47.6212	49.524	38.5908	20.637	36.313	18.7256	15.9679	0.748352	5.12019	0.00446	0.0355
Kcnmb2	38.4403	44.4865	38.8865	31.0825	50.6812	54.1341	50.6999	59.6606	58.6935	-0.586756	5.59079	0.00447	0.0355
Lyar	16.9348	15.7888	13.2747	17.0187	19.1548	23.2294	19.0289	23.661	25.051	-0.574447	4.28364	0.00447	0.0355
Plcb1	155.405	166.528	194.383	227.756	161.428	106.794	132.182	97.8376	93.1748	0.562675	7.19909	0.00447	0.0355
Rfxap	57.0193	53.0247	48.4601	56.6927	63.5449	88.3427	59.3584	69.2895	81.6039	-0.511263	6.01251	0.00447	0.0355
Trappc2	70.1725	72.1678	66.3736	64.2991	76.5842	107.709	80.3955	102.725	110.734	-0.564298	6.39993	0.00447	0.0355
Btbd8	4.70228	2.91382	2.81286	4.70615	2.17908	2.74483	1.9424	0.967731	1.33066	0.967343	1.4416	0.00448	0.0355
2610318N02Rik	1.41397	1.38915	1.57915	1.14918	2.38996	3.45645	1.87655	2.5161	2.69024	-0.954532	1.10335	0.00449	0.0355
Polr2l	16.8033	11.3165	11.9423	12.039	13.7774	26.7875	15.8355	22.7901	24.3568	-0.74346	4.13267	0.00449	0.0355
Cntn3	9.43744	8.02994	6.1192	11.2181	6.25608	4.98135	5.76135	2.90319	2.63238	0.859668	2.65898	0.00449	0.0355
Map4k3	74.809	86.0592	85.8662	95.8193	67.3758	60.437	67.8193	47.5156	42.3206	0.507652	6.11448	0.0045	0.0355
Jup	16.5402	16.8392	21.2692	54.066	20.6661	12.3517	12.3787	11.3225	8.41784	0.911063	4.21341	0.0045	0.0356
Ednrb	12.6929	18.2961	22.7496	112.072	18.4168	13.4191	15.3087	14.9514	10.0378	1.30507	4.61357	0.0045	0.0356
2410003K15Rik	15.8496	14.027	14.6071	15.979	16.8352	26.33	18.6009	20.9514	25.1089	-0.596574	4.24081	0.00451	0.0356
Lrrn4	0.460363	1.11809	1.28306	1.09445	0.351465	0.0508301	0.65844	0.14516	0.202491	1.65279	-0.587016	0.00451	0.0356
Slbp	74.2171	80.5704	69.5319	78.8006	86.3901	104.71	93.5643	108.483	125.776	-0.54476	6.53009	0.00451	0.0356
Adc	121.207	124.142	110.343	87.6657	146.315	149.542	147.886	185.998	190.949	-0.639834	7.16028	0.00452	0.0356
Clpp	103.516	87.5161	78.0198	83.5067	98.9022	157.319	99.0623	130.595	142.12	-0.586304	6.77977	0.00452	0.0356
Kif27	0.822077	1.32138	1.72719	6.23838	1.05439	1.11826	0.82305	0.290319	0.491764	1.55783	0.576499	0.00452	0.0356
Atp6v1d	400.056	411.356	361.033	351.155	439.015	577.023	480.53	592.929	684.767	-0.624676	8.91982	0.00453	0.0356
B3gat3	138.142	115.164	115.722	107.256	150.427	203.27	132.544	163.547	198.759	-0.583767	7.21636	0.00454	0.0356
BC005624	125.646	101.679	94.8476	119.514	123.259	187.563	123.523	151.16	175.936	-0.5513	7.07075	0.00453	0.0356
Helz	41.7286	54.9221	52.9508	70.428	44.9172	37.6143	39.1443	25.8384	28.8116	0.550766	5.44404	0.00453	0.0356
Nphp3	6.67526	2.9477	3.0596	16.7451	3.16318	4.67637	1.9424	1.98385	1.53315	1.3154	2.1651	0.00454	0.0356
Trhde	16.869	18.872	20.3809	26.7594	16.9406	15.4524	12.4445	7.98378	7.49217	0.702652	3.97001	0.00454	0.0356
Zkscan16	4.99823	6.26809	6.66203	7.88006	4.81507	1.72822	4.11525	2.17739	2.31418	0.983811	2.19392	0.00454	0.0356
Itgb1bp1	39.0322	35.6434	34.5439	33.5997	39.2235	62.3177	41.8439	53.6123	53.718	-0.561621	5.46402	0.00455	0.0356
Pigy	57.6769	53.5668	48.7562	47.1162	60.1005	77.4651	63.0456	80.2249	79.7525	-0.554593	5.99703	0.00455	0.0356
Prorsd1	7.06986	7.1829	5.92181	6.2931	8.85692	15.0965	7.96713	9.82247	10.6163	-0.721654	3.14919	0.00455	0.0356
Rps27a	43.8003	38.4217	36.7152	24.2969	44.0737	77.8209	44.3789	54.1445	68.7023	-0.741367	5.60763	0.00455	0.0356
Snrpd1	40.9065	35.4063	30.1025	23.3666	38.2745	61.3011	41.9756	52.0155	61.4994	-0.713543	5.44252	0.00455	0.0356
Rps29	41.0052	28.6299	30.3493	18.8793	33.8109	65.1134	39.0784	53.0317	64.0161	-0.834011	5.40367	0.00456	0.0356
Col4a2	43.1426	20.6339	25.4144	175.66	25.4812	35.7336	20.4446	21.2417	15.4761	1.28624	5.29259	0.00457	0.0357
Manf	47.3187	37.0665	37.5541	34.0922	41.4026	63.9443	48.2637	66.5315	73.7935	-0.671463	5.66737	0.00458	0.0358
Tceal8	40.5777	38.0829	35.6789	37.5945	41.754	68.9765	44.5435	49.2575	63.6979	-0.574711	5.55752	0.00459	0.0358
Rps15	67.4103	55.7352	55.9611	46.7331	63.5097	113.046	66.4366	83.5636	96.8486	-0.646931	6.1881	0.00459	0.0358
Sbno2	6.0176	4.67566	6.76073	16.0885	5.72888	4.11724	4.14817	2.17739	2.19847	1.05083	2.47948	0.00459	0.0358
Stmn1	104.93	83.1793	84.4351	108.077	106.318	193.358	95.0788	131.708	161.414	-0.617551	6.89544	0.0046	0.0359
Fkbp2	128.31	99.1714	95.3905	109.226	117.811	191.172	118.552	163.256	195.288	-0.627189	7.09412	0.00461	0.0359
Taf10	49.1602	39.9803	43.3772	34.6942	49.5917	75.5335	50.4694	61.0154	64.855	-0.590737	5.71852	0.00462	0.0359
Kirrel2	1.9401	2.50724	2.07263	7.38756	1.15983	2.64317	0.98766	0.532252	1.01246	1.32613	1.12324	0.00463	0.036
Pkn1	16.2771	11.0454	12.7812	33.5997	10.8954	13.6225	9.71199	7.01605	7.49217	0.788961	3.71564	0.00464	0.0361
Nudt19	95.0321	98.5615	96.3774	74.4228	113.664	143.646	115.589	136.257	136.768	-0.56791	6.82927	0.00464	0.0361
Sox9	31.2718	26.7326	36.2711	235.472	36.0954	25.1609	23.6051	29.1771	20.8566	1.3761	5.5639	0.00464	0.0361
Akap8	66.8513	55.498	54.2832	137.19	51.595	58.7088	43.7534	44.7576	35.2624	0.616909	5.88175	0.00466	0.0362
Pnpla3	14.074	6.0648	5.52702	15.7054	4.74478	6.60791	4.54324	5.41929	4.51266	0.883319	2.87194	0.00466	0.0362
Pdcd6	110.783	91.3109	88.531	78.1439	105.896	158.793	113.976	135.482	150.104	-0.595834	6.85927	0.00468	0.0363
Slc39a12	6.51085	8.53816	8.48793	49.0315	7.94311	6.91289	5.79427	5.90316	5.26477	1.29425	3.42852	0.00468	0.0363
Rnf187	863.707	813.497	784.738	677.63	963.154	1260.74	988.055	1165.73	1356.11	-0.620119	9.96431	0.00468	0.0363
Zfp36l2	8.05635	6.64079	7.15552	33.1072	7.38076	6.91289	4.70785	4.79027	3.73162	1.13831	3.10902	0.00469	0.0363
Vldlr	40.1831	33.4072	40.4657	53.7924	29.98	32.5313	29.8603	26.3223	24.2121	0.459227	5.09407	0.0047	0.0364
Arvcf	37.8813	36.6599	42.5877	59.4288	33.5649	23.9918	32.8232	28.161	22.0715	0.543201	5.12338	0.0047	0.0364
Ap2s1	192.432	154.839	153.671	113.112	185.363	303.202	183.31	246.82	286.901	-0.711076	7.67961	0.00471	0.0364
Aven	12.3312	11.0454	10.8073	10.7256	14.1992	19.6713	13.0371	17.274	17.6746	-0.616903	3.8358	0.00471	0.0364
Bccip	91.7767	65.6286	60.8959	79.9498	85.1951	138.715	77.4326	110.708	122.565	-0.605837	6.53953	0.00471	0.0364
Zfp207	164.744	111.64	102.891	246.416	100.449	124.28	97.0212	86.8055	69.6858	0.595983	6.89794	0.00473	0.0365
Otx1	1.7428	0.677632	1.57915	9.24813	1.26527	1.11826	0.757206	0.822571	0.549619	1.65493	0.89133	0.00473	0.0365
Ssfa2	21.3411	17.1441	22.7003	53.1904	20.4904	20.0779	10.3704	12.3386	7.28968	0.89941	4.30083	0.00473	0.0365
Ryr2	71.9811	44.5543	57.6389	97.078	38.4503	71.0097	25.2512	19.9836	25.1957	0.84299	5.60045	0.00474	0.0365
Ccdc32	114.236	112.114	104.026	76.1739	128.144	167.739	131.326	154.934	169.398	-0.625924	7.02936	0.00474	0.0365
Syngap1	3.05813	2.71053	2.36872	3.61169	2.0385	1.98237	1.31688	0.774185	1.09924	0.945415	1.09929	0.00475	0.0365
Alkbh1	2.95948	1.96513	1.97394	3.22864	1.40586	0.609961	1.38272	1.0645	1.24387	1.0125	0.86281	0.00476	0.0366
Map3k3	16.1127	12.5023	15.5941	37.5945	14.0234	12.3517	10.1729	10.6934	6.27722	0.801563	3.8604	0.00476	0.0366
Srek1ip1	19.6312	17.3813	16.8278	15.2676	20.3498	32.2263	20.0166	25.5481	31.8489	-0.660422	4.48867	0.00476	0.0366
Vps13a	19.3352	16.5003	19.5913	33.3808	13.6368	18.7055	11.4898	10.3063	13.1908	0.613889	4.08844	0.00476	0.0366
Spag7	87.3703	84.6023	75.4537	58.5532	88.8503	131.904	98.1734	119.757	133.904	-0.645932	6.63109	0.00478	0.0367
Syt16	19.0722	22.7007	22.3548	37.6492	19.0143	16.6214	18.1729	11.7579	9.89313	0.650007	4.27209	0.00477	0.0367
Pdxp	127.027	111.572	107.333	99.5405	137.317	174.449	136.462	150.772	171.047	-0.540149	7.09251	0.0048	0.0368
Grpel1	98.5835	99.0359	91.6893	87.2279	109.446	145.73	113.844	140.902	133.066	-0.522872	6.83768	0.0048	0.0368
1700019E19Rik	17.1978	12.9089	12.4851	14.8298	16.9055	26.1267	15.4404	22.6933	27.3074	-0.682921	4.22354	0.00483	0.0369
Cacybp	243.828	250.216	223.055	207.672	265.391	349.914	283.426	378.431	408.135	-0.623636	8.20104	0.00482	0.0369
Cfl1	1183.26	1087.8	1019.24	851.156	1198.6	1797.3	1325.84	1636.87	1903.91	-0.673338	10.4018	0.00483	0.0369
Itpa	45.3786	43.775	38.7878	27.1424	49.4511	63.8934	52.0168	61.9348	66.7353	-0.660209	5.66669	0.00482	0.0369
Prelid1	118.346	103.136	100.671	71.8508	128.214	161.284	121.219	161.224	173.361	-0.661006	7.00791	0.00482	0.0369
Zscan20	7.23428	5.15	4.29331	7.77061	3.33892	3.76143	4.27986	2.32255	2.57453	0.812034	2.17696	0.00483	0.0369
Glb1l	3.65002	4.57401	3.50374	14.9393	4.81507	1.27075	2.27162	1.54837	0.867819	1.45176	1.99058	0.00484	0.037
Stk38	29.8907	13.6882	15.446	52.6432	13.2151	24.246	9.38277	8.95151	8.07071	1.0124	4.21414	0.00484	0.037
Nr3c1	56.3616	48.2135	53.395	123.618	49.0645	53.4224	36.9714	33.6287	35.0599	0.630423	5.71992	0.00486	0.0371
Rpp14	52.8102	53.9056	44.2655	42.2459	58.6243	77.7701	57.5477	74.5153	68.3841	-0.547257	5.89559	0.00486	0.0371
Zmym4	42.5836	43.4023	41.8474	51.6582	36.2009	34.412	31.4405	24.29	26.7867	0.468175	5.19768	0.00486	0.0371
Prox2	1.67704	0.677632	1.4311	2.51724	0.632637	1.27075	0.395064	0.290319	0.289273	1.38106	0.0592076	0.00487	0.0371
Dctn6	95.7555	79.8928	79.8951	74.8058	95.1064	149.237	93.1034	118.983	129.826	-0.57498	6.68279	0.00488	0.0372
Pdap1	72.5401	53.804	46.6836	41.6439	70.0821	102.626	63.0456	78.7733	92.1623	-0.661596	6.12632	0.00488	0.0372
Frrs1	1.5455	0.880921	0.592181	2.68141	0.773223	0.508301	0.230454	0.629025	0.3182	1.39296	-0.0921219	0.00489	0.0372
Homer3	25.6159	17.9911	22.3055	37.7039	17.1515	22.4669	15.3746	8.61281	10.4428	0.716616	4.26752	0.00489	0.0372
Fau	66.5553	56.7517	56.2078	37.9775	63.8963	111.115	68.4119	86.2732	96.3857	-0.700633	6.18025	0.00492	0.0374
Gm17596	29.2659	25.1063	21.4666	17.7301	25.8327	42.9514	28.8397	42.2415	48.5111	-0.75681	4.99778	0.00494	0.0375
Plk5	10.9501	4.67566	5.97116	23.9685	4.92051	8.28531	4.27986	2.37094	2.11169	1.24519	2.82671	0.00493	0.0375
Rsl24d1	42.1232	34.7964	33.8037	32.4505	41.2971	57.8955	41.35	54.4833	63.0326	-0.606466	5.49836	0.00494	0.0375
Wscd2	14.7316	17.0086	17.4693	13.8448	11.9147	8.64112	11.6215	7.25798	6.94255	0.702371	3.61215	0.00494	0.0375
Bnip3	198.68	231.852	200.058	190.818	235.938	305.031	256.594	326.851	337.784	-0.589178	8.00621	0.00496	0.0375
Phf3	45.6746	44.9948	54.4313	49.524	43.0545	35.8861	28.4775	23.9513	26.7577	0.554287	5.28657	0.00496	0.0375
Snrpd3	56.1643	48.0102	50.0393	52.0412	52.9658	83.1072	63.2761	73.354	89.4721	-0.576351	5.99699	0.00495	0.0375
Uchl5	108.744	110.793	101.312	88.8148	126.211	158.539	126.058	145.837	154.877	-0.543863	6.97764	0.00495	0.0375
2400001E08Rik	51.6922	47.7053	47.2758	42.0817	60.4871	68.4681	55.2102	72.5314	66.8799	-0.527902	5.84819	0.00496	0.0376
Tcte1	43.6358	40.8612	39.4787	44.9273	52.7197	63.0293	47.8686	53.1284	57.3628	-0.458963	5.62998	0.00496	0.0376
Bbs9	7.82617	7.55559	8.83336	18.6057	6.11549	7.21787	5.92596	5.27413	4.57051	0.751107	2.96362	0.00497	0.0376
Kif1a	703.665	866.42	1113.1	829.157	683.599	479.633	624.629	427.979	457.312	0.648727	9.42457	0.00497	0.0376
Phldb1	50.1467	19.2786	29.3623	45.0367	14.2343	38.885	9.67907	8.85474	7.86822	1.13836	4.58386	0.00497	0.0376
Slc17a6	1.5455	0.914803	4.29331	1.6964	0.773223	0.914942	1.02058	0.241933	0.694255	1.46855	0.487637	0.00497	0.0376
Lphn3	26.997	29.3076	23.8353	54.6132	27.0979	18.4005	22.5187	14.1289	12.6412	0.708824	4.63609	0.00498	0.0376
2210016L21Rik	125.021	105.067	99.9799	100.252	127.722	176.533	125.005	146.127	178.163	-0.563435	7.05393	0.00499	0.0376
Zmat2	136.267	107.54	105.211	108.187	136.509	210.132	125.63	151.692	202.346	-0.608087	7.16866	0.00499	0.0377
Atpaf2	48.3052	48.2135	41.9461	47.937	52.2277	63.2835	59.951	70.2089	64.1318	-0.496823	5.79895	0.005	0.0377
Dlg2	91.5136	114.283	123.42	120.773	98.2696	44.1714	82.9964	49.5478	40.7007	0.754739	6.40279	0.005	0.0377
Sh3tc2	1.97298	1.32138	1.5298	5.3081	1.37071	0.508301	1.11935	1.01612	0.549619	1.28514	0.697244	0.005	0.0377
2700081O15Rik	21.7357	19.0753	21.3185	26.9783	17.9247	16.0115	15.605	9.19344	9.57493	0.62459	4.11288	0.00502	0.0377
Cthrc1	24.8267	20.9727	22.1574	22.0532	24.954	38.7834	25.6462	34.0157	36.4195	-0.584266	4.81083	0.00502	0.0377
[truncated: 13,029 more rows]
