# Supplementary material for: Pro-cognitive restoration of experience-dependent parvalbumin inhibitory neuron plasticity in neurodevelopmental disorders
Source: Research Square preprint supplement (doi:10.21203/rs.3.rs-5624085/v1), 2025-01-16
Supplement: Supplementary file 2 [file 9d750295a28f0b32f3f47625.xlsx]

## Sheet: Table 1
Supplementary Table 2
Figure 1d
CA3
One-way ANOVA
ANOVA table	DF	F (DFn, DFd)	p
Treatment (between columns)	3	F (3, 17) = 16.28	P<0.0001
Residual (within columns)	17
Total	20
Bonferroni's multiple comparisons test
Comparison	p
Ctrl vs Tbr1	0.0003
Ctrl vs Bcl11a	0.0184
Ctrl vs Meis2	<0.0001
CA2
One-way ANOVA
ANOVA table	DF	F (DFn, DFd)	p
Treatment (between columns)	3	F (3, 12) = 11.51	0.0008
Residual (within columns)	12
Total	15
Bonferroni's multiple comparisons test
Comparison	p
Ctrl vs Tbr1	0.0007
Ctrl vs Bcl11a	0.0017
Ctrl vs Meis2	0.0022
Figure 2b
Violin plot
Descriptive Statistics
Group	n cells	Mean	SEM
Cntnap2+/+ -naïve	107	9104.22	503.451
Cntnap2+/+ -social	122	12407	622.27
Cntnap2-/- -naïve	63	9683.37	870.864
Cntnap2-/- -social	69	6419.12	695.409
Two-way ANOVA
ANOVA table	F	DFn, DFd	p
Interaction	23.25	1, 357	P<0.0001
Genotype	0.0008016	1, 357	0.9774
naive vs social	15.77	1, 357	P<0.0001
Bonferroni's multiple comparisons test
Comparison	p
Cntnap2+/+ -naïve vs social	0.0004
Cntnap2-/- -naïve vs social	0.0168
Cntnap2+/+ naïve vs Cntnap2-/- naïve	>0.9999
cumulative data
Descriptive Statistics
Group	n cells	n mice	Mean	SEM
Cntnap2+/+ -naïve	107	3	9104.22	503.451
Cntnap2+/+ -social	122	3	12407	622.27
Cntnap2-/- -naïve	63	4	9683.37	870.864
Cntnap2-/- -social	69	3	6419.12	695.409
Kolmogorov-Smirnov test
Group	Mean rank diff.	P
Cntnap2+/+ -naïve vs social	47.91	0.0032
Cntnap2-/- -naïve vs social	-62	0.0039
Cntnap2+/+ naïve vs Cntnap2-/- naïve	-0.5251	>0.9999
Figure 2d
Descriptive Statistics
Group	n	Mean	SEM
Cntnap2+/+ -naïve	3	17.9895	0.655001
Cntnap2+/+ -social	3	22.7503	0.697309
Cntnap2-/- -naïve	3	15.0011	0.506769
Cntnap2-/- -social	4	15.4419	0.445239
Two-way ANOVA
ANOVA table	F	DFn, DFd	p
Interaction	14.28	1, 9	0.0044
Genotype	20.7	1, 9	0.0014
naive vs social	81.11	1, 9	P<0.0001
Bonferroni's multiple comparisons test
Comparison	p
Cntnap2+/+ -naïve vs social	0.0018
Cntnap2-/- -naïve vs social	>0.9999
Cntnap2+/+ naïve vs Cntnap2-/- naïve	0.0356
Cntnap2+/+ social vs Cntnap2-/- social	0.0001
Figure 2e
Descriptive Statistics
Group	n	Mean	SEM
Cntnap2+/+ Ctrl	4	42.5062	1.24742
Cntnap2+/+ Meis2	4	51.2858	1.41385
Cntnap2-/- Ctrl	4	34.4062	1.77362
Cntnap2-/- Meis2	4	45.539	2.53286
Two-way ANOVA
ANOVA table	F	DFn, DFd	p
Interaction	0.4222	1, 12	0.5281
Genotype	30.23	1, 12	0.0001
naive vs social	14.62	1, 12	0.0024
Bonferroni's multiple comparisons test
Comparison	p
Ctrl:WT vs. Ctrl:KO	0.0491
Ctrl:WT vs. Meis2:WT	0.03
Ctrl:KO vs. Meis2:KO	0.0057
Meis2:WT vs. Meis2:KO	0.2668
Figure 3a
CA2 PN sEPSC Frequency
Group	n cells	n mice	Mean	Std. Deviation
+/+|Ctrl	9	9	14.196	15.694
+/+|Meis2	9	9	8.171	6.67
-/-|Ctrl	8	8	21.856	19.22
-/-|Meis2	8	5	5.341	6.359
Comparison Group	Kolmogorov-Smirnov d	p value
+/+|Ctrl vs +/+|Meis2	0.528	<0.0001
+/+|Ctrl vs -/-|Ctrl	0.188	0.045
-/-|Ctrl vs -/-|Meis2	0.669	<0.0001
CA2 PN sEPSC Amplitude
Group	n cells	n mice	Mean	Std. Deviation
+/+|Ctrl	9	9	14.401	7.979
+/+|Meis2	9	9	11.555	4.285
-/-|Ctrl	8	8	22.095	14.124
-/-|Meis2	8	5	11.358	2.875
Comparison Group	Kolmogorov-Smirnov d	p value
+/+|Ctrl vs +/+|Meis2	0.445	<0.0001
+/+|Ctrl vs -/-|Ctrl	0.346	<0.0001
-/-|Ctrl vs -/-|Meis2	0.772	<0.0001
Figure 3b
CA2 PN sIPSC Frequency
Group	n cells	n mice	Mean	Std. Deviation
+/+|Ctrl	9	9	10.366	6.033
+/+|Meis2	9	9	11.299	5.538
-/-|Ctrl	8	8	7.699	4.553
-/-|Meis2	8	5	14.968	5.431
Comparison Group	Kolmogorov-Smirnov d	p value
+/+|Ctrl vs +/+|Meis2	0.138	0.286
+/+|Ctrl vs -/-|Ctrl	0.386	<0.0001
-/-|Ctrl vs -/-|Meis2	0.217	0.016
CA2 PN sIPSC Amplitude
Group	n cells	n mice	Mean	Std. Deviation
+/+|Ctrl	9	9	13.467	8.774
+/+|Meis2	9	9	11.091	8.053
-/-|Ctrl	8	8	13.557	8.334
-/-|Meis2	8	5	14.694	10.491
Comparison Group	Kolmogorov-Smirnov d	p value
+/+|Ctrl vs +/+|Meis2	0.148	0.215
+/+|Ctrl vs -/-|Ctrl	0.079	0.909
-/-|Ctrl vs -/-|Meis2	0.128	0.372
Figure 3c
CA2 PN mEPSC Frequency
Group	n cells	n mice	Mean	Std. Deviation
+/+|Ctrl	9	9	6.593	7.02
+/+|Meis2	9	9	4.171	3.92
-/-|Ctrl	8	8	12.196	8.711
-/-|Meis2	8	5	3.512	5.901
Comparison Group	Kolmogorov-Smirnov d	p value
+/+|Ctrl vs +/+|Meis2	0.168	0.114
+/+|Ctrl vs -/-|Ctrl	0.297	0.0003
-/-|Ctrl vs -/-|Meis2	0.207	0.025
CA2 PN mEPSC Amplitude
Group	n cells	n mice	Mean	Std. Deviation
+/+|Ctrl	9	9	10.849	5.236
+/+|Meis2	9	9	9.664	3.124
-/-|Ctrl	8	8	12.197	6.059
-/-|Meis2	8	5	12.054	3.437
Comparison Group	Kolmogorov-Smirnov d	p value
+/+|Ctrl vs +/+|Meis2	0.046	0.996
+/+|Ctrl vs -/-|Ctrl	0.119	0.233
-/-|Ctrl vs -/-|Meis2	0.152	0.06
Figure 3d
CA2 PN mIPSC Frequency
Group	n cells	n mice	Mean	Std. Deviation
+/+|Ctrl	9	9	8.733	5.363
+/+|Meis2	9	9	11.108	5.953
-/-|Ctrl	8	8	9.289	6.952
-/-|Meis2	8	5	15.457	8.808
Comparison Group	Kolmogorov-Smirnov d	p value
+/+|Ctrl vs +/+|Meis2	0.104	0.674
+/+|Ctrl vs -/-|Ctrl	0.072	0.961
-/-|Ctrl vs -/-|Meis2	0.197	0.046
CA2 PN mIPSC Amplitude
Group	n cells	n mice	Mean	Std. Deviation
+/+|Ctrl	9	9	10.944	3.35
+/+|Meis2	9	9	9.241	2.2678
-/-|Ctrl	8	8	11.71	3.71
-/-|Meis2	8	5	14.82	6.154
Comparison Group	Kolmogorov-Smirnov d	p value
+/+|Ctrl vs +/+|Meis2	0.18	0.054
+/+|Ctrl vs -/-|Ctrl	0.081	0.858
-/-|Ctrl vs -/-|Meis2	0.279	0.0003
Figure 3e
PV IN mEPSC Frequency
Group	n cells	n mice	Mean	Std. Deviation
+/+|Ctrl	10	3	9.342	10.449
+/+|Meis2	12	3	10.317	12.961
-/-|Ctrl	9	3	9.956	10.622
-/-|Meis2	15	6	10.001	12.667
Comparison Group	Kolmogorov-Smirnov d	p value
+/+|Ctrl vs +/+|Meis2	0.138	0.286
+/+|Ctrl vs -/-|Ctrl	0.118	0.474
-/-|Ctrl vs -/-|Meis2	0.118	0.474
PV IN mEPSC Amplitude
Group	n cells	n mice	Mean	Std. Deviation
+/+|Ctrl	10	3	10.51	4.507
+/+|Meis2	12	3	15.717	12.069
-/-|Ctrl	9	3	9.544	4.529
-/-|Meis2	15	6	12.987	6.732
Comparison Group	Kolmogorov-Smirnov d	p value
+/+|Ctrl vs +/+|Meis2	0.485	<0.0001
+/+|Ctrl vs -/-|Ctrl	0.158	0.158
-/-|Ctrl vs -/-|Meis2	0.505	<0.0001
Figure 3g
EPSC Train
Group	n cells	n mice
+/+|Ctrl	12	8
+/+|Meis2	12	9
-/-|Ctrl	10	6
-/-|Meis2	11	6
Two-way RM ANOVA	F (DFn, DFd)	p value
Current train x Condition	F (27, 369) = 2.511	<0.0001
Current train	F (1.232, 50.50) = 297.4	<0.0001
Condition	F (3, 41) = 2.747	P=0.0551
Tukey's posthoc/Comparison Group	Stim Train #	p value
+/+|Ctrl vs +/+|Meis2	1	>0.9999
+/+|Ctrl vs -/-|Ctrl	1	>0.9999
-/-|Ctrl vs -/-|Meis2	1	>0.9999
+/+|Ctrl vs +/+|Meis2	2	0.9266
+/+|Ctrl vs -/-|Ctrl	2	0.8539
-/-|Ctrl vs -/-|Meis2	2	0.9998
+/+|Ctrl vs +/+|Meis2	3	0.9688
+/+|Ctrl vs -/-|Ctrl	3	0.3259
-/-|Ctrl vs -/-|Meis2	3	0.9987
+/+|Ctrl vs +/+|Meis2	4	0.9857
+/+|Ctrl vs -/-|Ctrl	4	0.2204
-/-|Ctrl vs -/-|Meis2	4	0.9747
+/+|Ctrl vs +/+|Meis2	5	>0.9999
+/+|Ctrl vs -/-|Ctrl	5	0.0806
-/-|Ctrl vs -/-|Meis2	5	0.9151
+/+|Ctrl vs +/+|Meis2	6	0.936
+/+|Ctrl vs -/-|Ctrl	6	0.102
-/-|Ctrl vs -/-|Meis2	6	0.3414
+/+|Ctrl vs +/+|Meis2	7	0.9874
+/+|Ctrl vs -/-|Ctrl	7	0.0301
-/-|Ctrl vs -/-|Meis2	7	0.0843
+/+|Ctrl vs +/+|Meis2	8	0.9801
+/+|Ctrl vs -/-|Ctrl	8	0.0316
-/-|Ctrl vs -/-|Meis2	8	0.0265
+/+|Ctrl vs +/+|Meis2	9	0.9961
+/+|Ctrl vs -/-|Ctrl	9	0.0047
-/-|Ctrl vs -/-|Meis2	9	0.0036
+/+|Ctrl vs +/+|Meis2	10	0.9862
+/+|Ctrl vs -/-|Ctrl	10	0.0192
-/-|Ctrl vs -/-|Meis2	10	0.0094
IPSC Train
Group	n cells	n mice
+/+|Ctrl	12	8
+/+|Meis2	12	9
-/-|Ctrl	10	6
-/-|Meis2	11	6
Two-way RM ANOVA	F (DFn, DFd)	p value
Current train x Condition	F (27, 369) = 2.237	0.0005
Current train	F (9, 369) = 505.3	<0.0001
Condition	F (3, 41) = 4.666	0.0068
Tukey's posthoc/Comparison Group	Stim Train #	p value
+/+|Ctrl vs +/+|Meis2	1	>0.9999
+/+|Ctrl vs -/-|Ctrl	1	>0.9999
-/-|Ctrl vs -/-|Meis2	1	>0.9999
+/+|Ctrl vs +/+|Meis2	2	0.9941
+/+|Ctrl vs -/-|Ctrl	2	0.6102
-/-|Ctrl vs -/-|Meis2	2	0.0404
+/+|Ctrl vs +/+|Meis2	3	0.8253
+/+|Ctrl vs -/-|Ctrl	3	0.0772
-/-|Ctrl vs -/-|Meis2	3	0.0008
+/+|Ctrl vs +/+|Meis2	4	0.7554
+/+|Ctrl vs -/-|Ctrl	4	0.0218
-/-|Ctrl vs -/-|Meis2	4	0.0058
+/+|Ctrl vs +/+|Meis2	5	0.4545
+/+|Ctrl vs -/-|Ctrl	5	0.0064
-/-|Ctrl vs -/-|Meis2	5	0.0025
+/+|Ctrl vs +/+|Meis2	6	0.6538
+/+|Ctrl vs -/-|Ctrl	6	0.0103
-/-|Ctrl vs -/-|Meis2	6	0.0107
+/+|Ctrl vs +/+|Meis2	7	0.6082
+/+|Ctrl vs -/-|Ctrl	7	0.006
-/-|Ctrl vs -/-|Meis2	7	0.0151
+/+|Ctrl vs +/+|Meis2	8	0.8251
+/+|Ctrl vs -/-|Ctrl	8	0.0031
-/-|Ctrl vs -/-|Meis2	8	0.0124
+/+|Ctrl vs +/+|Meis2	9	0.8196
+/+|Ctrl vs -/-|Ctrl	9	0.0122
-/-|Ctrl vs -/-|Meis2	9	0.0717
+/+|Ctrl vs +/+|Meis2	10	0.8292
+/+|Ctrl vs -/-|Ctrl	10	0.0028
-/-|Ctrl vs -/-|Meis2	10	0.0331
E/I Ratio Across Train
Group	n cells	n mice
+/+|Ctrl	12	8
+/+|Meis2	12	9
-/-|Ctrl	10	6
-/-|Meis2	11	6
Two-way RM ANOVA	F (DFn, DFd)	p value
Current train x Condition	F (27, 378) = 2.861	<0.0001
Current train	F (9, 378) = 3.111	0.0013
Condition	F (3, 42) = 4.900	0.0052
Tukey's posthoc/Comparison Group	Stim Train #	p value
+/+|Ctrl vs +/+|Meis2	1	0.9995
+/+|Ctrl vs -/-|Ctrl	1	0.8662
-/-|Ctrl vs -/-|Meis2	1	0.9757
+/+|Ctrl vs +/+|Meis2	2	0.9991
+/+|Ctrl vs -/-|Ctrl	2	0.735
-/-|Ctrl vs -/-|Meis2	2	0.9096
+/+|Ctrl vs +/+|Meis2	3	0.9998
+/+|Ctrl vs -/-|Ctrl	3	0.5968
-/-|Ctrl vs -/-|Meis2	3	0.7848
+/+|Ctrl vs +/+|Meis2	4	0.9998
+/+|Ctrl vs -/-|Ctrl	4	0.3578
-/-|Ctrl vs -/-|Meis2	4	0.5702
+/+|Ctrl vs +/+|Meis2	5	>0.9999
+/+|Ctrl vs -/-|Ctrl	5	0.0257
-/-|Ctrl vs -/-|Meis2	5	0.0648
+/+|Ctrl vs +/+|Meis2	6	0.9993
+/+|Ctrl vs -/-|Ctrl	6	0.0193
-/-|Ctrl vs -/-|Meis2	6	0.0257
+/+|Ctrl vs +/+|Meis2	7	0.9997
+/+|Ctrl vs -/-|Ctrl	7	0.0255
-/-|Ctrl vs -/-|Meis2	7	0.0175
+/+|Ctrl vs +/+|Meis2	8	0.9906
+/+|Ctrl vs -/-|Ctrl	8	0.0111
-/-|Ctrl vs -/-|Meis2	8	0.0025
+/+|Ctrl vs +/+|Meis2	9	0.9998
+/+|Ctrl vs -/-|Ctrl	9	0.0004
-/-|Ctrl vs -/-|Meis2	9	0.0001
+/+|Ctrl vs +/+|Meis2	10	>0.9999
+/+|Ctrl vs -/-|Ctrl	10	0.0008
-/-|Ctrl vs -/-|Meis2	10	0.0001
Figure 3h
paired t-test	Baseline Mean	Post Mean	p value
+/+|Ctrl	99.6186	85.5067	<0.0001
+/+|Ctrl	97.3359	80.4581	<0.001
+/+|Ctrl	98.4564	74.3211	<0.0001
+/+|Ctrl	102.479	113.333	0.177
+/+|Ctrl	99.9272	43.8092	<0.0001
+/+|Ctrl	100	73.9254	0.004
+/+|Ctrl	99.9741	59.9192	<0.001
+/+|Ctrl	100.109	81.2106	<0.001
+/+|Ctrl	98.6629	93.047	0.052
+/+|Ctrl	98.4591	40.1501	<0.0001
paired t-test	Baseline Mean	Post Mean	p value
-/-|Ctrl	101.283	70.6131	<0.0001
-/-|Ctrl	98.2899	95	>0.9999
-/-|Ctrl	99.7557	98.7133	>0.9999
-/-|Ctrl	98.2803	98.6333	0.845514
-/-|Ctrl	97.9842	72.6765	<0.0001
-/-|Ctrl	99.1377	87.8359	0.0549902
-/-|Ctrl	103.641	94.9964	0.42225
-/-|Ctrl	100	69.8008	<0.001
-/-|Ctrl	98.9547	91.5929	0.083723
paired t-test	Baseline Mean	Post Mean	p value
+/+|Meis2	100	58.8029	<0.0001
+/+|Meis2	101.243	64.5361	<0.0001
+/+|Meis2	96.7934	34.442	<0.0001
+/+|Meis2	97.5637	56.9539	<0.0001
+/+|Meis2	99.7557	90.7133	0.024
+/+|Meis2	101.218	72.6158	0.00527319
+/+|Meis2	95.8189	83.6017	0.041
+/+|Meis2	101.652	50.5071	<0.0001
+/+|Meis2	92.7948	47.7648	<0.001
paired t-test	Baseline Mean	Post Mean	p value
-/-|Meis2	100	45.3802	<0.0001
-/-|Meis2	101.706	49.7893	<0.0001
-/-|Meis2	105.543	53.608	<0.0001
-/-|Meis2	101.026	67.1451	0.002
-/-|Meis2	97.5637	56.9539	<0.0001
-/-|Meis2	90.7409	41.678	<0.0001
-/-|Meis2	98.1782	91.5583	0.009
-/-|Meis2	101.661	82.8944	<0.0001
-/-|Meis2	101.101	85.7013	<0.0001
-/-|Meis2	101.574	87.33	<0.0001
Figure 3i
PV IN AP Spiking
Group	n cells	n mice
+/+|Ctrl	9	4
+/+|Meis2	12	5
-/-|Ctrl	9	4
-/-|Meis2	10	4
Two-way RM ANOVA	F (DFn, DFd)	p value
Current step x Condition	F (57, 684) = 2.788	<0.0001
Current step	F (19, 684) = 231.9	<0.0001
Condition	F (3, 36) = 9.347	0.0001
Tukey's posthoc/Comparison Group	Current Step pA	p value
+/+|Ctrl vs +/+|Meis2	10	0.8502
+/+|Ctrl vs -/-|Ctrl	10	>0.9999
-/-|Ctrl vs -/-|Meis2	10	>0.9999
+/+|Ctrl vs +/+|Meis2	20	0.291
+/+|Ctrl vs -/-|Ctrl	20	>0.9999
-/-|Ctrl vs -/-|Meis2	20	0.9909
+/+|Ctrl vs +/+|Meis2	30	0.0325
+/+|Ctrl vs -/-|Ctrl	30	0.9997
-/-|Ctrl vs -/-|Meis2	30	0.7147
+/+|Ctrl vs +/+|Meis2	40	0.0325
+/+|Ctrl vs -/-|Ctrl	40	0.9017
-/-|Ctrl vs -/-|Meis2	40	0.196
+/+|Ctrl vs +/+|Meis2	50	0.1007
+/+|Ctrl vs -/-|Ctrl	50	0.4297
-/-|Ctrl vs -/-|Meis2	50	0.0163
+/+|Ctrl vs +/+|Meis2	60	0.3828
+/+|Ctrl vs -/-|Ctrl	60	0.1368
-/-|Ctrl vs -/-|Meis2	60	0.0111
+/+|Ctrl vs +/+|Meis2	70	0.4332
+/+|Ctrl vs -/-|Ctrl	70	0.0573
-/-|Ctrl vs -/-|Meis2	70	0.0027
+/+|Ctrl vs +/+|Meis2	80	0.6261
+/+|Ctrl vs -/-|Ctrl	80	0.027
-/-|Ctrl vs -/-|Meis2	80	0.0021
+/+|Ctrl vs +/+|Meis2	90	0.7026
+/+|Ctrl vs -/-|Ctrl	90	0.0047
-/-|Ctrl vs -/-|Meis2	90	0.0009
+/+|Ctrl vs +/+|Meis2	100	0.7248
+/+|Ctrl vs -/-|Ctrl	100	0.0029
-/-|Ctrl vs -/-|Meis2	100	0.0007
+/+|Ctrl vs +/+|Meis2	110	0.4406
+/+|Ctrl vs -/-|Ctrl	110	0.0034
-/-|Ctrl vs -/-|Meis2	110	0.0008
+/+|Ctrl vs +/+|Meis2	120	0.6339
+/+|Ctrl vs -/-|Ctrl	120	0.0034
-/-|Ctrl vs -/-|Meis2	120	0.0022
+/+|Ctrl vs +/+|Meis2	130	0.6494
+/+|Ctrl vs -/-|Ctrl	130	0.0015
-/-|Ctrl vs -/-|Meis2	130	0.0025
+/+|Ctrl vs +/+|Meis2	140	0.6105
+/+|Ctrl vs -/-|Ctrl	140	0.0021
-/-|Ctrl vs -/-|Meis2	140	0.0045
+/+|Ctrl vs +/+|Meis2	150	0.5479
+/+|Ctrl vs -/-|Ctrl	150	0.0012
-/-|Ctrl vs -/-|Meis2	150	0.0055
+/+|Ctrl vs +/+|Meis2	160	0.6876
+/+|Ctrl vs -/-|Ctrl	160	0.001
-/-|Ctrl vs -/-|Meis2	160	0.0109
+/+|Ctrl vs +/+|Meis2	170	0.6571
+/+|Ctrl vs -/-|Ctrl	170	0.0015
-/-|Ctrl vs -/-|Meis2	170	0.0121
+/+|Ctrl vs +/+|Meis2	180	0.7535
+/+|Ctrl vs -/-|Ctrl	180	0.0007
-/-|Ctrl vs -/-|Meis2	180	0.0111
+/+|Ctrl vs +/+|Meis2	190	0.801
+/+|Ctrl vs -/-|Ctrl	190	0.0003
-/-|Ctrl vs -/-|Meis2	190	0.0049
+/+|Ctrl vs +/+|Meis2	200	0.8502
+/+|Ctrl vs -/-|Ctrl	200	0.0006
-/-|Ctrl vs -/-|Meis2	200	0.01
PV IN Rheobase
Group	n cells	n mice
+/+|Ctrl	14	5
+/+|Meis2	14	5
-/-|Ctrl	12	4
-/-|Meis2	12	5
Two-way ANOVA	F (DFn, DFd)	p value
Meis2 Expression x Condition	F (1, 48) = 0.5174	0.4754
Meis2 Expression	F (1, 48) = 39.42	<0.0001
Condition	F (1, 48) = 1.286	0.2625
Fisher's LSD/Comparison Group	p value
+/+|Ctrl vs +/+|Meis2	0.0002
+/+|Ctrl vs -/-|Ctrl	0.1963
-/-|Ctrl vs -/-|Meis2	<0.0001
Figure 4c
Novel Object Location
Descriptive Statistics
Group	n	location	Mean	SEM
Cntnap2+/+ Ctrl	9	fam	2.45037	0.759067
		novel	6.01804	0.970469
Cntnap2+/+ Meis2	7	fam	3.68475	1.20773
		novel	5.34091	1.24777
Cntnap2-/- Ctrl	7	fam	1.99373	0.801831
		novel	2.24566	0.881521
Cntnap2-/- Meis2	10	fam	2.68828	0.770566
		novel	5.7693	1.35121
Two-way ANOVA
ANOVA table	F	DFn, DFd	p
Interaction	3.137	3, 29	0.0405
Genotype	26.26	1, 29	<0.0001
objects	1.199	3, 29	0.3275
Bonferroni's multiple comparisons test
Comparison	p
WT+Ctrl	0.0004
WT+Meis2	0.2984
KO+Ctrl	>0.9999
KO+Meis2	0.0012
Discrimination index
Descriptive Statistics
Group	n	Mean	SEM
Cntnap2+/+ Ctrl	9	0.5124	0.0937
Cntnap2+/+ Meis2	7	0.23	0.08312
Cntnap2-/- Ctrl	7	0.02932	0.118
Cntnap2-/- Meis2	10	0.4004	0.1287
One-way ANOVA
ANOVA table	DF	F (DFn, DFd)	p
Treatment (between columns)	3	F (3, 29) = 3.370	0.0318
Residual (within columns)	29
Total	32
Bonferroni's multiple comparisons test
Comparison	p
WT+Ctrl vs. WT+Meis2	0.5521
WT+Ctrl vs. KO+Ctrl	0.0346
WT-Meis2 vs. KO+Meis2	>0.9999
KO vs. KO+Meis2	0.1576
Figure 4f
Social habituation
Descriptive Statistics
Group	n	location	Mean	SEM
Cntnap2+/+ Ctrl	9	emp	137.662	10.0523
		emp	127.48	11.5352
Cntnap2+/+ Meis2	7	emp	152.151	15.3915
		emp	155.298	11.3117
Cntnap2-/- Ctrl	7	emp	109.561	12.951
		emp	114.199	14.7879
Cntnap2-/- Meis2	10	emp	132.302	8.16958
		emp	132.739	7.93287
Two-way ANOVA
ANOVA table	F	DFn, DFd	p
Interaction	0.2603	3, 29	0.8534
Genotype	0.005376	1, 29	0.9421
emp vs emp	3.02	3, 29	0.0457
Bonferroni's multiple comparisons test
Comparison, emp vs emp	p
WT+Ctrl	>0.9999
WT+Meis2	>0.9999
KO+Ctrl	>0.9999
KO+Meis2	>0.9999
social recognition
Descriptive Statistics
Group	n	location	Mean	SEM
Cntnap2+/+ Ctrl	9	emp	102.514	9.53927
		stimulus	198.946	12.6452
Cntnap2+/+ Meis2	7	emp	98.4134	3.82159
		stimulus	254.121	23.1506
Cntnap2-/- Ctrl	7	emp	107.861	19.7513
		stimulus	164.608	15.1656
Cntnap2-/- Meis2	10	emp	64.216	7.5205
		stimulus	251.258	17.831
Two-way ANOVA
ANOVA table	F	DFn, DFd	p
Interaction	8.013	3, 29	0.0005
Genotype	140.4	1, 29	<0.0001
emp vs emp	2.277	3, 29	0.1006
Bonferroni's multiple comparisons test
Comparison, emp vs stimulus	p
WT+Ctrl	0.0001
WT+Meis2	<0.0001
KO+Ctrl	0.0686
KO+Meis2	<0.0001
social discrimination
Descriptive Statistics
Group	n	location	Mean	SEM
Cntnap2+/+ Ctrl	9	fam	90.7991	9.42164
		novel	184.435	20.87
Cntnap2+/+ Meis2	7	fam	112.237	10.7601
		novel	170.993	12.4142
Cntnap2-/- Ctrl	7	fam	107.561	20.7172
		novel	132.042	21.8797
Cntnap2-/- Meis2	10	fam	110.566	6.06244
		novel	171.308	17.7074
Two-way ANOVA
ANOVA table	F	DFn, DFd	p
Interaction	1.599	3, 29	0.211
Genotype	28.78	1, 29	<0.0001
emp vs emp	0.7299	3, 29	0.5425
Bonferroni's multiple comparisons test
Comparison, fam vs novel	p
WT+Ctrl	0.0004
WT+Meis2	0.0778
KO+Ctrl	>0.9999
KO+Meis2	0.0191
Figure 4i
cFos+GFP+/GFP+
Descriptive Statistics
Group	n	Mean	SEM
Cntnap2+/+ Ctrl	7	6.07313	0.452523
Cntnap2+/+ Meis2	10	4.30383	0.75091
Cntnap2-/- Ctrl	7	2.39553	1.00494
Cntnap2-/- Meis2	8	7.23317	1.41458
Two-way ANOVA
ANOVA table	F	DFn, DFd	p
Interaction	11.19	1, 28	0.0023
Genotype	2.414	1, 28	0.1315
emp vs emp	0.1436	1, 28	0.7076
Tukey's multiple comparisons test
Comparison	p
WT+Ctrl vs KO+Ctrl	0.0835
WT+Ctrl vs WT+Meis2	0.5711
KO+Ctrl vs KO+Meis2	0.0108
WT+Meis2 vs KO+Meis2	0.1386
Figure 5c
Mann-Whitney U test
Group	n mice	Median	SD	p
KO+Ctrl	9	0.538	6.64086
KO+Meis2	12	0	0.16631
Mann-Whitney U test results	U=26	(df=19)		0.032
		Mean	SEM
KO+Ctrl	9	2.78578	2.21362
KO+Meis2	12	0.08375	0.04801
Extended data Figure 1a
Unpaired t test with Welch's correction
Group	n mice	Mean	SEM	p
shNT	5	1	0.05349	0.0006
shRNA	5	0.5668	0.05786
	t=5.498	df=7.951
Extended data Figure 1b
Unpaired t test
Group	n mice	Mean	SEM	p
Dsp	2	1	0.361	0.0096
Bok	2	70.43	6.845
	t=10.13	df=2
Extended data Figure 1d
Bcl11a
Unpaired t test with Welch's correction
Group	n mice	Mean	SEM	p
shNT	3	1	0.2539	0.011
shRNA	4	23.02	3.919
	t=5.606	df=3.025
Herc1
Unpaired t test with Welch's correction
Group	n mice	Mean	SEM	p
shNT	6	1	0.1151	0.0371
shRNA	7	3.047	0.7678
	t=2.637	df=6.269
Meis2
Unpaired t test with Welch's correction
Group	n mice	Mean	SEM	p
shNT	3	1	0.03037	0.036
shRNA	3	1.795	0.1634
	t=4.781	df=2.138
Tbr1
Unpaired t test with Welch's correction
Group	n mice	Mean	SEM	p
shNT	5	1	0.1025	0.0424
shRNA	5	3.713	0.9262
	t=2.911	df=4.098
Extended data Figure 1e
CA3
Unpaired t test with Welch's correction
Group	n mice	Mean	SEM	p
Ctrl	3	39.09	2.903	0.0222
Herc1	3	52.96	1.741
	t=4.098	df=3.274
CA2
Unpaired t test with Welch's correction
Group	n mice	Mean	SEM	p
Ctrl	3	43.24	1.879	0.0335
Herc1	3	51.74	1.899
	t=3.183	df=4.000
Figure S3a
EPSC Train PPR
Group	n cells	n mice
+/+|Ctrl	8	4
+/+|Meis2	8	7
-/-|Ctrl	9	4
-/-|Meis2	9	6
Two-way RM ANOVA	F (DFn, DFd)	p value
Current train x Condition	F (24, 240) = 0.9430	0.5433
Current train	F (3.916, 117.5) = 1.766	0.1417
Condition	F (3, 30) = 1.084	0.3709
IPSC Train PPR
Group	n cells	n mice
+/+|Ctrl	8	4
+/+|Meis2	8	7
-/-|Ctrl	9	4
-/-|Meis2	9	6
Two-way RM ANOVA	F (DFn, DFd)	p value
Current train x Condition	F (24, 272) = 0.7868	0.7528
Current train	F (3.534, 120.1) = 6.151	0.0669
Condition	F (3, 34) = 1.497	0.2328
Figure S3c
IPSC PPR +/+|Ctrl
Baseline Mean	Post Mean
0.7344	0.72558
0.685754	0.781996
0.750155	0.838338
0.851997	0.964069
0.543599	0.579555
0.760818	0.802109
1.15083	1.3916
0.795955	0.930111
0.478468	0.392389
Paired t test
p value	t value	df
0.0464	2.354	8
IPSC PPR -/-|Ctrl
Baseline Mean	Post Mean
0.789023	0.815959
0.914882	0.937178
0.86274	0.842467
0.881386	0.91655
0.80778	0.873959
0.881974	0.911917
0.582914	0.315465
0.659278	0.757402
Paired t test
p value	t value	df
0.978	0.028	7
IPSC PPR +/+|Meis2
Baseline Mean	Post Mean
0.675866	0.783938
0.692728	0.763324
0.813141	0.819189
0.878441	0.866796
0.798597	0.78658
0.684488	0.798597
0.994802	1.12408
0.795049	0.841088
0.699209	0.717414
Paired t test
p value	t value	df
0.022	2.808	8
IPSC PPR -/-|Meis2
Baseline Mean	Post Mean
0.9915	1.21437
0.898622	1.19538
0.49441	0.52067
0.445238	0.499172
0.770129	0.869516
0.556782	0.832516
0.839846	0.862432
0.876405	0.885687
0.850314	0.973468
0.878417	1.09027
Paired t test
p value	t value	df
0.003	3.876	9
EPSC PPR +/+|Ctrl
Baseline Mean	Post Mean
0.940179	0.937555
0.853414	0.759676
1.27805	1.17929
1.2931	1.32173
1.01109	0.955991
1.23289	1.20458
1.07557	1.07639
0.933845	1.19481
0.443659	0.524526
Paired t test
p value	t value	df
0.785	0.2809	8
EPSC PPR -/-|Ctrl
Baseline Mean	Post Mean
0.453101	0.621214
1.19484	1.17907
1.07816	0.925681
1.07475	1.02966
0.734733	0.79809
1.12136	0.937037
0.556702	0.59733
0.638525	0.670183
Paired t test
p value	t value	df
0.782	0.2875	7
EPSC PPR +/+|Meis2
Baseline Mean	Post Mean
0.899694	0.930416
0.80775	0.934388
0.916993	0.935375
0.847023	0.962954
0.890209	0.8619
0.780433	0.637079
0.96883	0.822768
0.851056	1.11525
0.693526	0.724416
Paired t test
p value	t value	df
0.511	0.6874	8
EPSC PPR -/-|Meis2
Baseline Mean	Post Mean
0.880037	0.881859
0.738642	0.73713
0.693436	0.687573
0.569706	0.579314
0.770129	0.805745
0.968778	1.11078
0.993015	1.02002
0.992231	1.05832
1.08242	1.0412
Paired t test
p value	t value	df
0.178	1.475	8
Figure S3d
PV IN Resting Membrane Potential
Group	n cells	n mice
+/+|Ctrl	14	5
+/+|Meis2	14	5
-/-|Ctrl	12	4
-/-|Meis2	12	5
Two-way ANOVA	F (DFn, DFd)	p value
Meis2 Expression x Condition	F (1, 49) = 0.2630	0.6104
Meis2 Expression	F (1, 49) = 0.1497	0.7005
Condition	F (1, 49) = 0.09867	0.7548
PV IN Threshold
Group	n cells	n mice
+/+|Ctrl	14	5
+/+|Meis2	14	5
-/-|Ctrl	12	4
-/-|Meis2	12	5
Two-way ANOVA	F (DFn, DFd)	p value
Meis2 Expression x Condition	F (1, 48) = 0.8285	0.3673
Meis2 Expression	F (1, 48) = 0.0003815	0.9845
Condition	F (1, 48) = 7.372	0.0092
Fisher's LSD/Comparison Group	p value
+/+|Ctrl vs +/+|Meis2	0.5153
+/+|Ctrl vs -/-|Ctrl	0.208
-/-|Ctrl vs -/-|Meis2	0.5294
Figure S4a
CA2 PN sEPSC Frequency
Group	n cells	n mice	Mean	Std. Deviation
+/+|Ctrl	7	7	14.075	15.2865
+/+|Tbr1	3	3	3.48193	4.59935
Kolmogorov-Smirnov d	p value
0.693	<0.0001
CA2 PN sEPSC Amplitude
Group	n cells	n mice	Mean	Std. Deviation
+/+|Ctrl	7	7	14.4622	7.97582
+/+|Tbr1	3	3	9.53261	3.03202
Kolmogorov-Smirnov d	p value
0.633	<0.0001
CA2 PN sIPSC Frequency
Group	n cells	n mice	Mean	Std. Deviation
+/+|Ctrl	7	7	9.79551	5.77078
+/+|Tbr1	4	4	11.5376	6.34341
Kolmogorov-Smirnov d	p value
0.187	0.21
CA2 PN sIPSC Amplitude
Group	n cells	n mice	Mean	Std. Deviation
+/+|Ctrl	7	7	14.0324	6.50544
+/+|Tbr1	4	4	10.8048	4.6687
Kolmogorov-Smirnov d	p value
0.164	0.168
Figure S4b
CA2 PN mEPSC Frequency
Group	n cells	n mice	Mean	Std. Deviation
+/+|Ctrl	7	7	5.82847	6.99256
+/+|Tbr1	4	4	2.0274	2.42812
Kolmogorov-Smirnov d	p value
0.207	0.025
CA2 PN mEPSC Amplitude
Group	n cells	n mice	Mean	Std. Deviation
+/+|Ctrl	7	7	11.1464	5.36839
+/+|Tbr1	4	4	9.28707	2.24735
Kolmogorov-Smirnov d	p value
0.1683	0.114
CA2 PN mIPSC Frequency
Group	n cells	n mice	Mean	Std. Deviation
+/+|Ctrl	7	7	8.34964	7.43275
+/+|Tbr1	4	4	13.6388	7.34063
Kolmogorov-Smirnov d	p value
0.7244	<0.0001
CA2 PN mIPSC Amplitude
Group	n cells	n mice	Mean	Std. Deviation
+/+|Ctrl	7	7	10.3991	3.65191
+/+|Tbr1	4	4	8.62146	2.99079
Kolmogorov-Smirnov d	p value
0.138	0.286
Figure S4c
EPSC Train
Group	n cells	n mice
+/+|Ctrl	8	5
+/+|Tbr1	2	2
Two-way RM ANOVA	F (DFn, DFd)	p value
Current train x Condition	F (9, 117) = 2.364	0.0172
Current train	F (1.299, 16.89) = 44.30	<0.0001
Condition	F (1, 13) = 0.2778	0.607
Bonferroni's posthoc/Stim Train #	p value
1	>0.9999
2	>0.9999
3	0.0082
4	0.0311
5	0.0371
6	>0.9999
7	>0.9999
8	>0.9999
9	>0.9999
10	>0.9999
IPSC Train
Group	n cells	n mice
+/+|Ctrl	8	5
+/+|Tbr1	2	2
Two-way RM ANOVA	F (DFn, DFd)	p value
Current train x Condition	F (9, 72) = 1.222	0.2952
Current train	F (9, 72) = 67.92	<0.0001
Condition	F (1, 8) = 4.786	0.0601
Bonferroni's posthoc/Stim Train #	p value
1	>0.9999
2	0.028
3	0.0115
4	0.011
5	0.0695
6	0.1218
7	0.1357
8	0.201
9	0.1082
10	0.1429
E/I Ratio Across Train
Group	n cells	n mice
+/+|Ctrl	8	5
+/+|Tbr1	2	2
Two-way RM ANOVA	F (DFn, DFd)	p value
Current train x Condition	F (9, 72) = 0.7533	0.6592
Current train	F (9, 72) = 0.3846	0.9389
Condition	F (1, 8) = 0.2250	0.6479
EPSC Train PPR
Group	n cells	n mice
+/+|Ctrl	8	5
+/+|Tbr1	2	2
Two-way RM ANOVA	F (DFn, DFd)	p value
Current train x Condition	F (8, 64) = 2.722	0.012
Current train	F (3.080, 24.64) = 1.467	0.2475
Condition	F (1, 8) = 0.4691	0.5127
Bonferroni's posthoc/Stim Train #	p value
1	0.514
2	0.9977
3	>0.9999
4	0.9992
5	0.1466
6	>0.9999
7	0.9999
8	0.9804
9	0.2041
IPSC Train PPR
Group	n cells	n mice
+/+|Ctrl	8	5
+/+|Tbr1	2	2
Two-way RM ANOVA	F (DFn, DFd)	p value
Current train x Condition	F (8, 72) = 0.2959	0.9652
Current train	F (1.877, 16.89) = 0.4804	0.6149
Condition	F (1, 9) = 1.424	0.2632
Figure S4d
PV IN Resting Membrane Potential
Group	n cells	n mice
+/+|Ctrl	9	4
+/+|Tbr1	6	3
Unpaired t test	df	p value
1.891	13	0.083
PV IN Threshold
Group	n cells	n mice
+/+|Ctrl	9	4
+/+|Tbr1	6	3
Unpaired t test	df	p value
1.195	13	0.253
PV IN Rheobase
Group	n cells	n mice
+/+|Ctrl	9	4
+/+|Tbr1	5	3
Unpaired t test	df	p value
1.168	12	0.265
PV IN AP Spiking
Group	n cells	n mice
+/+|Ctrl	9	4
+/+|Tbr1	2	2
Two-way RM ANOVA	F (DFn, DFd)	p value
Current step x Condition	F (19, 171) = 0.7293	0.7851
Current step	F (1.365, 12.28) = 51.13	<0.0001
Condition	F (1, 9) = 0.02647	0.8743
Tukey's posthoc/Current Step pA	p value
10	>0.9999
20	>0.9999
30	>0.9999
40	>0.9999
50	>0.9999
60	>0.9999
70	>0.9999
80	>0.9999
90	>0.9999
100	>0.9999
110	>0.9999
120	>0.9999
130	>0.9999
140	>0.9999
150	0.9995
160	0.9999
170	0.9988
180	0.9989
190	0.9986
200	0.9989
Extended data Figure 6d
Novel Object Recognition
Descriptive Statistics
Group	n	location	Mean	SEM
Cntnap2+/+ Ctrl	9	fam	3.53173	1.05915
		novel	9.10577	1.7533
Cntnap2+/+ Meis2	7	fam	3.70189	1.062
		novel	9.4452	2.20158
Cntnap2-/- Ctrl	7	fam	2.63854	1.04201
		novel	9.09753	2.09193
Cntnap2-/- Meis2	10	fam	4.53796	1.29247
		novel	9.47259	1.98464
Two-way ANOVA
ANOVA table	F	DFn, DFd	p
Interaction	0.1512	3, 29	0.9281
Genotype	48.32	1, 29	<0.0001
objects	0.1124	3, 29	0.9521
Bonferroni's multiple comparisons test
Comparison	p
WT+Ctrl	0.0046
WT+Meis2	0.0109
KO+Ctrl	0.0037
KO+Meis2	0.0086
Discrimination index
Descriptive Statistics
Group	n	Mean	SEM
Cntnap2+/+ Ctrl	9	0.5059	0.09733
Cntnap2+/+ Meis2	7	0.463	0.07753
Cntnap2-/- Ctrl	7	0.5921	0.1301
Cntnap2-/- Meis2	10	0.4154	0.1023
One-way ANOVA
ANOVA table	DF	F (DFn, DFd)	p
Treatment (between columns)	3	F (3, 29) = 0.5074	0.6803
Residual (within columns)	29
Total	32
Bonferroni's multiple comparisons test
Comparison	p
WT+Ctrl vs. WT+Meis2	>0.9999
WT+Ctrl vs. KO+Ctrl	>0.9999
WT-Meis2 vs. KO+Meis2	>0.9999
KO vs. KO+Meis2	>0.9999
